# Supplementary material for: Prenatal interleukin 6 elevation increases glutamatergic synapse density and disrupts hippocampal connectivity in offspring
Source: PubMed Central journal article supplement — Immunity. 2021 Nov 9;54(11):2611–2631.e8. doi: 10.1016/j.immuni.2021.10.006 (PMC8585508; doi:10.1016/j.immuni.2021.10.006), 2021-11-09

# Immunity

## Prenatal interleukin 6 elevation increases glutamatergic synapse density and disrupts hippocampal connectivity in offspring

### Graphical abstract

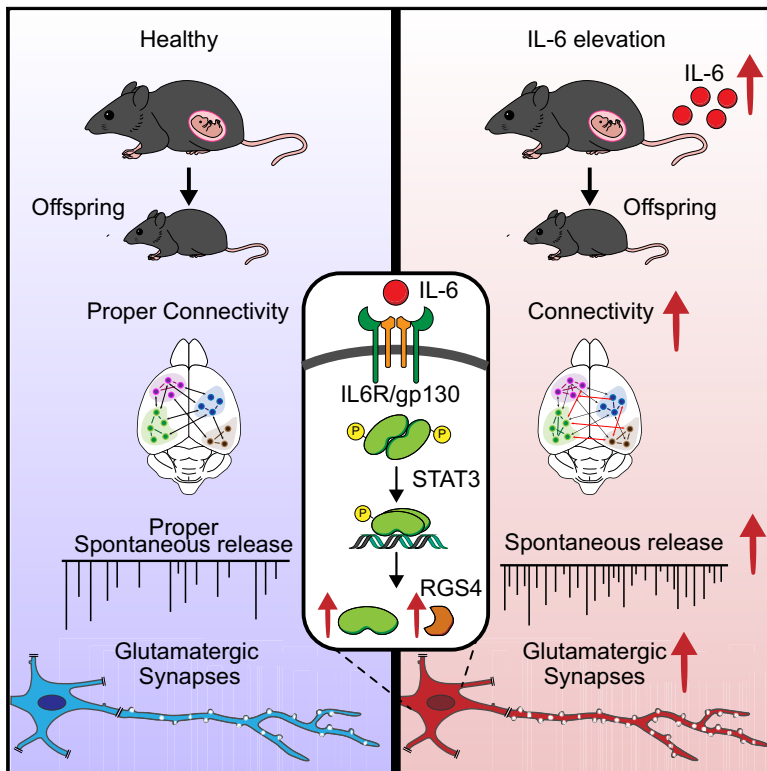

### Authors

Filippo Mirabella, Genni Desiato, Sara Mancinelli, ..., Simona Lodato, Michela Matteoli, Davide Pozzi

### Correspondence

michela.matteoli@hunimed.eu (M.M.),  
davide.pozzi@  
humanitasresearch.it (D.P.)

### In brief

Prenatal inflammation is a risk factor for different neurodevelopmental disorders, but the mechanisms by which brain connectivity is affected remain unclear. Mirabella et al. demonstrate that transient maternal elevation of IL-6 induces an abnormal, long-lasting increase of excitatory synapses and brain connectivity in the offspring, providing a mechanistic link between maternal immune activation and defects in newborn brain development.

### Highlights

- Prenatal IL-6 causes increases in excitatory synapses and brain connectivity in adults
- IL-6 activates genetic programs of synaptogenesis in developing neurons
- Transcription factor STAT3 is activated in neurons upon IL-6 elevation
- The STAT3 downstream gene *Rgs4* is responsible for the increase in excitatory synapses

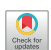

## Article

# Prenatal interleukin 6 elevation increases glutamatergic synapse density and disrupts hippocampal connectivity in offspring

Filippo Mirabella,<sup>1,2</sup> Genni Desiato,<sup>2,9,11</sup> Sara Mancinelli,<sup>2,11</sup> Giuliana Fossati,<sup>2</sup> Marco Rasile,<sup>1</sup> Raffaella Morini,<sup>2</sup> Marija Markicevic,<sup>3</sup> Christina Grimm,<sup>3</sup> Clara Amegandjin,<sup>4,5</sup> Alberto Termanini,<sup>6</sup> Clelia Peano,<sup>7,8</sup> Paolo Kunderfranco,<sup>6</sup> Graziella di Cristo,<sup>4,5</sup> Valerio Zerbi,<sup>3,10</sup> Elisabetta Menna,<sup>2,9</sup> Simona Lodato,<sup>1,2</sup> Michela Matteoli,<sup>2,9,\*</sup> and Davide Pozzi<sup>1,2,12,\*</sup>

<sup>1</sup>Department of Biomedical Sciences, Humanitas University, Via Rita Levi Montalcini 4, 20090 Pieve Emanuele, Milan, Italy

<sup>2</sup>IRCCS Humanitas Research Hospital, via Manzoni 56, 20089 Rozzano, Milan, Italy

<sup>3</sup>Neuroscience Center Zürich, ETH Zürich and University of Zürich, Zürich 8057, Switzerland

<sup>4</sup>Department of Neurosciences, Université de Montréal, Montréal, QC, Canada

<sup>5</sup>CHU Sainte-Justine Research Center, Montréal, QC, Canada

<sup>6</sup>Bioinformatic Unit, Humanitas Clinical and Research Center, 20089 Rozzano, Milan, Italy

<sup>7</sup>Institute of Genetic and Biomedical Research, UoS Milan, National Research Council, 20089 Rozzano, Milan, Italy

<sup>8</sup>Genomic Unit, Humanitas Clinical and Research Center, 20089 Rozzano, Milan, Italy

<sup>9</sup>Institute of Neuroscience – National Research Council, 20139 Milan, Italy

<sup>10</sup>Neural Control of Movement Lab, Department of Health Sciences and Technology, ETH Zürich, Zürich 8057, Switzerland

<sup>11</sup>These authors contributed equally

<sup>12</sup>Lead contact

\*Correspondence: [michela.matteoli@hunimed.eu](mailto:michela.matteoli@hunimed.eu) (M.M.), [davide.pozzi@humanitasresearch.it](mailto:davide.pozzi@humanitasresearch.it) (D.P.)

<https://doi.org/10.1016/j.immuni.2021.10.006>

## SUMMARY

Early prenatal inflammatory conditions are thought to be a risk factor for different neurodevelopmental disorders. Maternal interleukin-6 (IL-6) elevation during pregnancy causes abnormal behavior in offspring, but whether these defects result from altered synaptic developmental trajectories remains unclear. Here we showed that transient IL-6 elevation via injection into pregnant mice or developing embryos enhanced glutamatergic synapses and led to overall brain hyperconnectivity in offspring into adulthood. IL-6 activated synaptogenesis gene programs in glutamatergic neurons and required the transcription factor STAT3 and expression of the RGS4 gene. The STAT3-RGS4 pathway was also activated in neonatal brains during poly(I:C)-induced maternal immune activation, which mimics viral infection during pregnancy. These findings indicate that IL-6 elevation at early developmental stages is sufficient to exert a long-lasting effect on glutamatergic synaptogenesis and brain connectivity, providing a mechanistic framework for the association between prenatal inflammatory events and brain neurodevelopmental disorders.

## INTRODUCTION

Synapse formation during brain development is a complex and hierarchically regulated event ensuring proper brain connectivity (Lu et al., 2009; McAllister, 2007; Williams et al., 2010) and correct excitatory/inhibitory (E/I) balance in the adulthood (Cline, 2005; Gatto and Broadie, 2010). Defects in this process result in altered brain development (Courchesne et al., 2007; Supekar et al., 2013) and neurodevelopmental disorders (Melom and Litleton, 2011; Penzes et al., 2011).

Beyond activation of highly specialized genetic programs (Shen and Scheiffele, 2010), environmental factors critically contribute to the process of synapse formation (Grabrucker, 2013). Among them, inflammatory states occurring at early stages of neurodevelopment are recognized as main environmental insults negatively affecting the entire brain developmental trajectory (Bergink et al., 2014; Fontana et al., 2021; Knesel

et al., 2014; Li et al., 2009; Onore et al., 2012; Potvin et al., 2008). Although the underlying mechanisms are still undefined, soluble inflammatory mediators are thought to be key players in this process (Bauer et al., 2007; Deverman and Patterson, 2009; McAfoose and Baune, 2009).

Interleukin-6 (IL-6) is a pleiotropic proinflammatory cytokine that exerts several actions on the mature nervous system (Balschun et al., 2004; Erta et al., 2012), modulating a plethora of brain processes, including energy homeostasis (Timper et al., 2017; Wallenius et al., 2002), adult neurogenesis (Monje et al., 2003; Vallières et al., 2002), and axonal regeneration (Cafferty et al., 2004; Leibinger et al., 2013a, 2013b; Pieraut et al., 2011). IL-6 also plays key roles during brain development, and mouse embryos prenatally exposed to IL-6 display behavioral defects at adult stages (Choi et al., 2016; Shin Yim et al., 2017; Smith et al., 2007). A tight association between elevated IL-6 during pregnancy, altered brain connectivity, and working memory in newborns has been

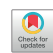



reported in humans (Rudolph et al., 2018; Spann et al., 2018). Whether IL-6 affects synaptogenesis trajectories is unknown.

We describe a pro-synaptogenic effect of IL-6 specifically involving glutamatergic synapses. The enhanced excitatory synapses persist at mature stages and associate with brain hyperconnectivity. This process depends on activation of signal transducer and activator of transcription-3 (STAT3) and involves its downstream target gene regulator of G protein signaling 4 (RGS4). Therefore, a transient increase in IL-6, consequent to inflammatory processes occurring at early phases of neurodevelopment, is sufficient to disturb the process of excitatory synaptogenesis, resulting in abnormal brain connectivity in adulthood.

## RESULTS

### Transient prenatal IL-6 elevation enhances hippocampal glutamatergic synapses and functional connectivity in adulthood

We assessed whether transient prenatal IL-6 elevation affects the density of synaptic contacts in the offspring. A single intraperitoneal (i.p.) injection of 5  $\mu$ g of IL-6 (Choi et al., 2016; Galagher et al., 2013; Smith et al., 2007) or vehicle (as a control) was administered to pregnant mice on gestational day 15 (GD15) (Figure 1A), when the hippocampus is already formed (Urbán and Guillemot, 2014), neurogenesis is peaking, and synaptogenesis and astrogenesis have not yet started (Angevine, 1965; Finlay and Darlington, 1995; Reemst et al., 2016).

The density of excitatory and inhibitory synaptic puncta was evaluated in the hippocampal CA1 region of mice on post-natal day 15 (P15) through immunofluorescence analysis of the glutamate vesicular transporter (VGLUT) and GABA vesicular transporter (VGAT) (Figure 1B). The area of VGLUT- but not

VGAT-positive puncta was enhanced significantly in the hippocampus of mice exposed prenatally to IL-6 (Figure 1C). To evaluate possible functional changes, glutamatergic and GABAergic basal transmission was recorded simultaneously by whole-cell patch-clamp technique in pyramidal CA1 neurons (Figure 1D). We found a substantial increase in the frequency of miniature excitatory postsynaptic currents (mEPSCs) in mice exposed prenatally to IL-6 (Figure 1E). Miniature inhibitory postsynaptic currents (mIPSCs) were not altered (Figure 1F), resulting in E/I imbalance of neurotransmission (Figure 1G).

Maternal IL-6 elevation triggers activation of peripheral cells and modulates immune molecules and the gut microbiota in the mother (Choi et al., 2016; Kim et al., 2017; Shin Yim et al., 2017). To bypass any possible indirect signaling from the mother, IL-6 or vehicle was injected intracerebroventricularly (i.c.v.) into embryos at embryonic day 15 (E15) (Figure 1H). Consistent with the results obtained upon i.p. injection, i.c.v. administration of IL-6, acting locally in the embryonic brain without inducing an immune response in the mother (Choi et al., 2016), promotes an increase of glutamatergic synapses (Figure 1H).

The increase in excitatory synapse density in mice exposed prenatally to IL-6 was confirmed using the recombinant antibody-like protein fibronectin intrabodies generated with mRNA display (FingRs), which binds endogenous PSD-95 (PSD95.FingR-GFP). GD14 cortical progenitors were co-electroporated with PSD95.FingR-EGFP to selectively target excitatory neurons and a TdTomato-expressing vector to visualize dendritic branches. Pregnant dams were subsequently injected i.p. with vehicle or IL-6 at GD15, and the offspring was analyzed at P20 (Figure 1I). In line with the results obtained in the hippocampus, the density of endogenous PSD-95 clusters in cortical dendritic branches of mice exposed prenatally to IL-6 was

### Figure 1. Transient prenatal exposure of embryos to IL-6 on E15 increases glutamatergic synapses and brain connectivity in the offspring at post-natal stages

- (A) Experimental workflow: i.p. injection of vehicle or IL-6 on GD15. Male offspring was analyzed on P15.
- (B) Immunofluorescence analysis of vesicular glutamate transporter (VGLUT1; green) and vesicular GABA transporter (VGAT; red) puncta in the *stratum radiatum* of the CA1 hippocampal region of offspring on P15. Right panels: high-magnification images relative to the dotted squares. Scale bars, 5  $\mu$ m.
- (C) Quantitative analysis of VGLUT1 (vehicle, n = 5 mice; IL-6, n = 7 mice; 3 independent experiments) and VGAT area under the two conditions. Vehicle, n = 6 mice; IL-6, n = 7 mice; 3 independent experiments; Mann-Whitney test; \*\*p = 0.0025.
- (D) Electrophysiological traces of mEPSCs and mIPSCs recorded in CA1 pyramidal hippocampal neurons in acute brain slices established from P15 male offspring.
- (E and F) Analysis of frequency and amplitude of mEPSCs (vehicle, n = 18 cells, 4 mice; IL-6, n = 19 cells, 6 mice; 3 independent experiments; Mann-Whitney test; \*\*\*\*p = 0.00002) and mIPSCs (vehicle, n = 12 cells, 3 mice; IL-6, n = 8 cells, 4 mice; 3 independent experiments).
- (G) Quantitative analysis of the E/I ratio, calculated as the ratio between mEPSC and mIPSC frequency recorded at the single-cell level. Vehicle, n = 12 cells, 3 mice; IL-6, n = 8 cells, 3 mice; 3 independent experiments; Mann-Whitney test; \*\*\*p = 0.0007.
- (H) Top panel: experimental workflow; i.c.v. injection of vehicle or IL-6 into E15 embryos. The offspring was analyzed on P15. Bottom panels: immunofluorescence analysis of Vglut-1-positive puncta (green) in the *stratum radiatum* of the CA1 hippocampal region of P15 offspring. Scale bar, 10  $\mu$ m. Also shown is quantitative analysis of Vglut-1 area in the CA1 hippocampal region under the two conditions. Vehicle, n = 7 injected mice; IL-6, n = 8 injected mice; Mann-Whitney test; \*\*\*p = 0.0003.
- (I) Top panel: experimental workflow; *in utero* co-electroporation of PSD95.FingR-GFP and TdTomato in E14 embryos, followed by i.p. injection of vehicle or IL-6 in the mother on GD15. The male offspring was analyzed at P20 for synaptic density in the cortex. Bottom panels: representative dendritic segment of cortical neurons expressing PSD95.FingR-GFP of embryos exposed to vehicle or IL-6. Scale bar, 5  $\mu$ m. Also shown is quantitative analysis of PSD-95 cluster density along the dendrite. Vehicle, n = 25; IL-6, n = 48, number of mice (vehicle, n = 5; IL-6, n = 11), number of independent experiments (vehicle, n = 4; IL-6, n = 5); \*p = 0.0295; Mann-Whitney test.
- (J) Randomized non-parametric statistics of whole-brain functional connectome mapping indicate a shift toward hyperconnectivity in IL-6 male mice.
- (K) Circos plot showing the anatomical location of hyperconnected edges (n = 242) in IL-6 mice compared with vehicle-treated mice (p < 0.05, uncorrected; vehicle, n = 9 mice; IL-6, n = 7 mice; 3 independent experiments).
- (L) Dual regression analysis in 15 rs networks (RSNs) reveals a significant increase in dorsal hippocampal network strength in the IL-6-treated group compared with vehicle ctrl mice (p = 0.017, Bonferroni corrected).
- (M) Multivariate ANOVA, Bonferroni corrected across 15 RSNs. The bar plots represents mean  $\pm$  SEM; \*\*p = 0.017.
- See also Figures S1 and S2.

increased significantly relative to vehicle-exposed mice (Figure 1I).

The selective increase in excitatory but not inhibitory synapses in mice exposed to prenatal IL-6 elevation persisted up to P30 (Figures S1A–S1C). An abnormal number of excitatory synapses and/or altered E/I balance within local microcircuits, occurring in many models of neurodevelopmental disorders (Durand et al., 2007; Lee et al., 2015; Sala et al., 2001), is often associated with macroscale alterations in functional connectivity, detectable by resting-state fMRI (Ajram et al., 2017; Filipello et al., 2018; Pagani et al., 2019; Zhou et al., 2019). Hence, we determined whether the transient prenatal IL-6 elevation affects brain connectivity in adulthood. We acquired resting-state fMRI (rs-fMRI) scans in 16 mice (9 treated and 7 controls) at 14 weeks of age using standardized pipelines for anesthesia control, data acquisition, and preprocessing (Figure S1D; Zerbi et al., 2015, 2018). To probe the existence of aberrant functional connections, blood-oxygen-level-dependent (BOLD) time series were extracted from 165 regions of interest (ROIs) using Allen's Common Coordinate Framework, and their connectivity couplings were measured using regularized Pearson's correlation coefficients. Randomized permutation testing (5,000 permutations) revealed an overall hyperconnectivity phenotype of IL-6 mice compared with controls (Figure 1J). The spatial distribution of the hyperconnected edges was widespread (242 of 2,724 edges were identified as significantly hyperconnected at  $p < 0.05$ ), and the strongest contribution was given by hippocampal-midbrain, hippocampal-parietal, hippocampal-cortical subplate, prefrontal-parietal, and somatomotor-thalamic connections among all (Figure 1K). Only 36 edges (1.3%) were found to be hypoconnected in the IL-6 group compared with vehicle controls (Figure S1D).

Next we examined whether excessive excitatory neurotransmission prompts large-scale rs network (RSN) reconfiguration. The connectivity strength within 15 maximally independent RSNs was measured using a dual regression approach, as described elsewhere (Filippini et al., 2009); for a complete list and spatial distribution of the networks please refer to our previous study (Zerbi et al., 2015). Statistical analysis was conducted by comparing the connectivity strength within all voxels that constitute each RSN. In the dorsal hippocampal network, connectivity was significantly higher in the IL-6 group compared with controls ( $p = 0.017$ ; Figures 1L and 1M). The temporal association network also showed moderate increases in connectivity in the IL-6 group without reaching statistical significance ( $p = 0.09$ ). Conversely, a reduction in connectivity approaching significance was seen in the primary and secondary somatosensory networks ( $p = 0.066$  and  $p = 0.130$ , respectively; Figure S1E). None of the other networks were affected. These data suggest that excitatory neurotransmission after IL-6 exposure can be detected with rs-fMRI in the form of increased synchronicity, especially within elements of the hippocampal network. The structural integrity of major axonal bundles was quantified by extracting fractional anisotropy (FA) values from seven white-matter structures, as described previously (Zerbi et al., 2013b, 2019). Not all white matter tracts exhibited significant differences between IL-6 mice and vehicle controls (Figure S1F), indicating that prenatal IL-6 does not compromise the macroscopic characteristics of anatomical connections but, rather, impairs their function. In line with the altered brain connectivity primarily involving the hip-

pocampal region, mice exposed prenatally to IL-6 showed a lower discrimination index in the object location memory test (Figure S1G), indicating a specific impairment of spatial memory, without defective performance in the novel object recognition, open field, and elevated plus maze tests (Figures S1H–S1J).

No major anatomical alterations, including cortical architecture or lamination, were observed under any experimental condition (Figures S2A and S2B). In addition, no sign of astrogliosis or inflammation (Figures S2C–S2H), including the transcriptional amount of mRNA coding for inflammatory mediators (Figures S2I and S2J), was detected in the offspring brain. These data demonstrate that transient prenatal exposure to IL-6 results, in the offspring, in a selective increase in glutamatergic inputs associated with altered hippocampus-related functional connectivity and behavior, with no major morphological defects or inflammatory signs.

### Prenatal IL-6 engages molecular programs of synaptogenesis in developing hippocampal neurons

The long-lasting effects produced by IL-6 suggest involvement of a transcriptional mechanism. To investigate the molecular programs activated by prenatal IL-6, pregnant mothers were injected with the cytokine or vehicle on GD15, and embryonic hippocampi were dissociated and analyzed through 10X single-cell sequencing after 24 h (GD16). This time window allowed us to investigate the early transcriptome rearrangements induced by IL-6 with single-cell resolution (Mancinelli and Lodato, 2018; Figure 2A).

We profiled 10,877 cells isolated from five pooled hippocampi under control conditions or upon IL-6 administration (control [ctrl], 5,892; IL-6, 4,985). The median number of genes detected per cell was 3,948 for IL-6 and 4,042 for ctrl conditions. Unsupervised clustering analysis identified 14 transcriptionally independent clusters that were assigned to distinct cell types according to the expression of known signature genes (Figure 2B; Figures S3A and S3B; Table S1). The most abundant clusters (*cornu ammonis* excitatory neuron 1 (CA-ExN1), CA-ExN2, and CA-ExN3) displayed enrichment of CA neuron-specific genes at different stages of their differentiation (e.g., *Cntn2*, *Neurod2*, *Bhlhe22*, *Arpp21*, *Ndrg1*, *Crym*, *Emx1*, and *Sstr2*), and one cluster (radial glia [RG]) expressed cycling glia-specific markers (*Hes5*, *Vim*, and *Mt3*) (Figure 2C; Table S1). We also identified a cell cluster expressing specific markers of dentate gyrus (DG-ExN; e.g., *Prox1*, *Calb2*, and *Kcnk1*) and Cajal-Retzius neurons (CA-CR; e.g., *Rspo1*, *Rspo3*, and *Reln*; Figure 2C). Two clusters were clearly ascribed to the GABAergic lineage, expressing prototypical markers of medial ganglionic eminence (MGE)-derived (*Sst*, *Sp9*, and *Maf*) and caudal ganglionic eminence (CGE)-derived (*Adarb2*, *Htr3a*, and *Cxcl14*) cortical and hippocampal GABAergic neurons (Figure 2C; Table S1; Mancinelli and Lodato, 2018; Tomassy et al., 2010). At this stage of development, besides being the most abundant cell types identified, neuronal clusters are also the main cells affected by IL-6. Indeed, differential expression analysis revealed that the subtype displaying the highest number of deregulated genes was CA-ExN1 (Figures 2D and 2E; Figures S3D and S3E; Table S2), corresponding to the excitatory pyramidal neurons of the CA periventricular stratum (differentially expressed genes [DEGs], ctrl versus IL-6 = 460). In contrast, non-neuronal subtypes were modified only to a very low extent (Figures 2D and 2E). Gene Ontology analysis of DEGs in neuronal clusters

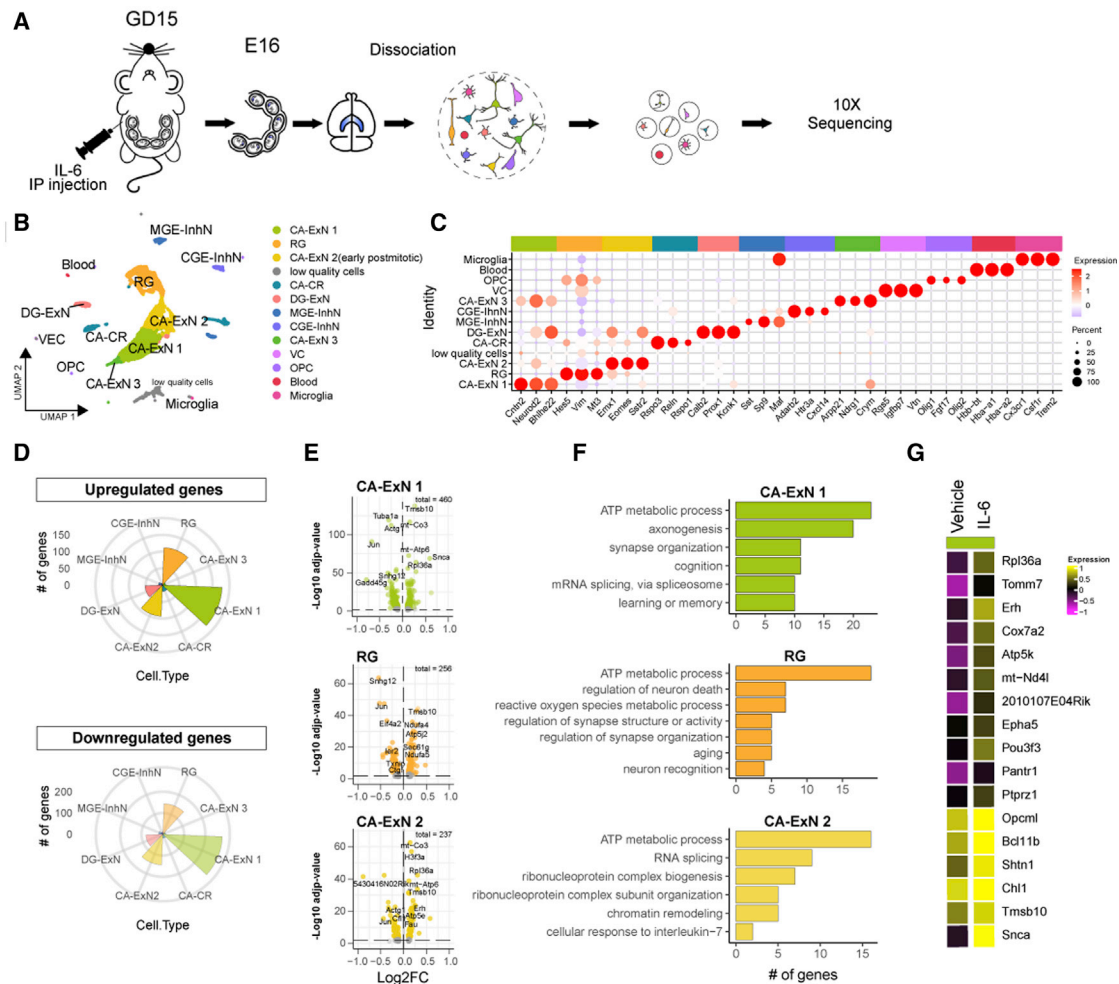

**Figure 2. Single-cell sequencing of embryonic brains exposed to IL-6 reveals a deep transcriptional rearrangement in neuronal populations and engagement of key biological processes in synaptogenesis**

(A) Experimental workflow: maternal i.p. injection of vehicle or IL-6 was performed on GD15. 24 h later, embryonic hippocampi were dissected, and single-cell dissociation was sequenced.

(B) Uniform manifold approximation and projection (UMAP) plot showing the cell type population identified.

(C) Dot plot showing selected cell type markers used for cluster annotation.

(D) Rose plots showing the number of upregulated or downregulated genes upon IL-6 treatment in all different cell types.

(E) Volcano plots showing the correlation between statistical significance ( $-\log_{10}$ -adjusted p value) and the fold change of the deregulated genes in selected cell types of interest.

(F) Bar plots showing Gene Ontology enrichment for selected and most significant biological processes.

(G) Average heatmap of the top upregulated genes in the CA-ExN1 cell type.

i.p., intraperitoneal(ly); Hp, hippocampus; CA, *cornu ammonis*; ExN, excitatory neuron; RG, radial glia; CR, Cajal-Retzius; DG, dentate gyrus; MGE-InhN, medial ganglionic eminence-derived inhibitory interneuron; CGE-InhN, caudal ganglionic eminence-derived InhN; VC, vascular cell; OPC, oligodendrocyte precursor cell. See also Figure S3.

revealed enrichment of key biological processes related to axonogenesis (GO:0007409,  $\log_{10}$  false discovery rate [FDR] =  $-9.5768$ ) and synapse organization (GO:0050808,  $\log_{10}$  FDR =  $-3.1784$ ) (Figure 2F; Figure S3F). Particularly, in CA-ExN1, IL-6 induced increased expression of genes associated previously with cortical spine maturation (*Opoml*; Zhang et al., 2019b) and axon formation (*Shn1*; Zhang et al., 2019a) (Figure 2G). Specific pathways associated with energetic metabolism were also upregulated (e.g., GO:0046034, ATP metabolic process; GO:0006091, generation of precursor metabolites and energy; GO:0007005, mitochondrion organization; GO:0022900, electron transport chain), sug-

gesting that extensive reprogramming of cellular metabolism occurs in neurons upon prenatal IL-6 challenge.

### IL-6 selectively enhances glutamatergic synaptogenesis through direct action on neurons

To investigate the putative pro-synaptogenic role of IL-6 at the cellular and molecular levels, we exploited primary neuronal cultures, in which synapses develop from immature (4–7 days *in vitro* [DIV]) to mature (13–14 DIV) stages (Matteoli et al., 1995). Primary cultures of hippocampal neurons established from IL-6-exposed E18 embryos (Figure 3A) showed a higher

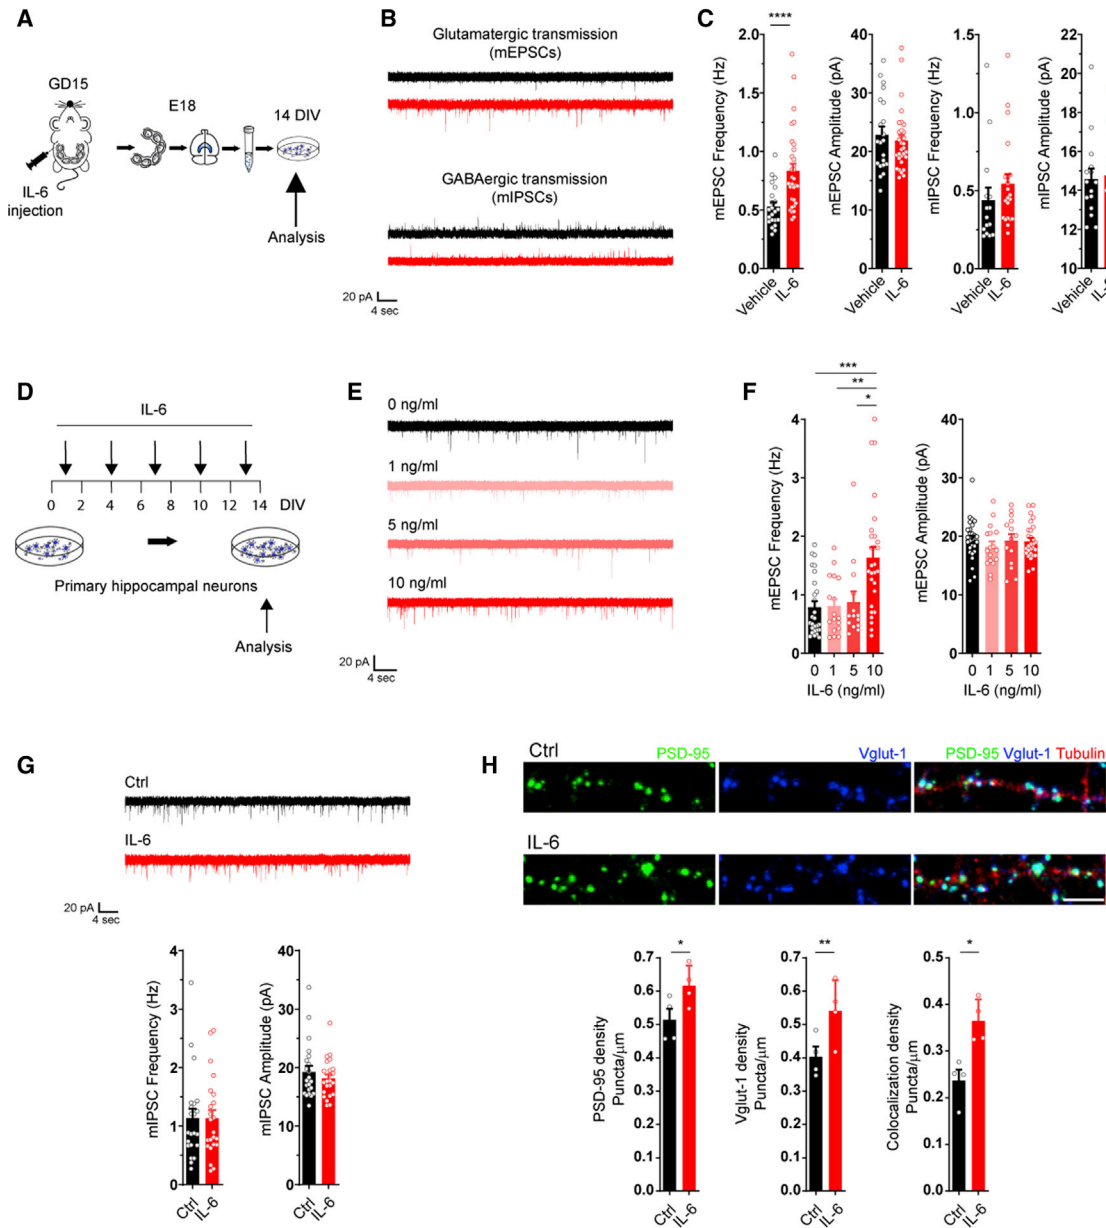

**Figure 3. The proinflammatory cytokine IL-6 selectively increases glutamatergic synaptogenesis in developing neurons**

(A) Experimental workflow: a single pulse of vehicle or IL-6 was injected i.p. into a pregnant mother on GD15, and primary hippocampal neurons were established on E18. Cultured neurons were assayed at 14 DIV through patch-clamp recording.

(B and C) Representative traces of glutamatergic and GABAergic synaptic basal transmission (B) followed by quantitative analysis (C) of the frequency and amplitude of mEPSCs and mIPSCs in hippocampal cultures established from vehicle- or IL-6-exposed embryos. mEPSCs: vehicle,  $n = 21$  cells; IL-6,  $n = 31$  cells; Mann-Whitney test; \*\*\*\* $p = 0.00004$ . mIPSCs: vehicle,  $n = 15$  cells; IL-6,  $n = 21$  cells; Mann-Whitney test; 4 independent experiments.

(D) Experimental workflow: different concentrations of IL-6 were incubated throughout *in vitro* development of hippocampal neurons, from 1 DIV up to 13 DIV, adding the cytokine every 3 days, and then analyzed at 14 DIV.

(E and F) Electrophysiological traces (E) and quantitative analysis (F) of mEPSC frequency (left panel) and amplitude (right panel) in neuronal cultures at 14 DIV upon chronic treatment with IL-6 at the indicated concentrations. Cells: Ctrl,  $n = 27$ ; 1 ng/mL,  $n = 17$ ; 5 ng,  $n = 14$ ; 10 ng,  $n = 28$ ; 3 independent experiments; one-way ANOVA on ranks followed by Dunn's multiple comparisons test; \*\*\* $p = 0.0005$ , \*\* $p = 0.0062$ , \* $p = 0.0376$ .

(G) Electrophysiological traces of mIPSCs of neuronal cultures at 14 DIV upon chronic treatment with IL-6 at 10 ng/mL. Bottom panel: quantitative analysis of the amplitude and frequency of mIPSCs. Cells: Ctrl,  $n = 22$ ; IL-6,  $n = 23$ ; 3 independent experiments; Mann-Whitney test.

(H) Immunofluorescence analyses of PSD-95-positive (green) and VGLUT1-positive (blue) punctum density along dendritic processes (beta III tubulin, red) under ctrl conditions and after chronic treatment with IL-6 (10 ng/mL). Scale bar, 10  $\mu\text{m}$ . Bottom panels: bar graphs showing postsynaptic (left graph), presynaptic (center panel), and colocalizing punctum density (right panel). Four independent experiments. Dendrites analyzed: ctrl,  $n = 62$ ; IL-6,  $n = 71$ ; paired *t* test; \* $p = 0.0341_{\text{PSD95 density}}$ , \*\* $p = 0.0089_{\text{Vglut density}}$ , \* $p = 0.0173_{\text{Coloc density}}$ .

See also [Figure S4](#).

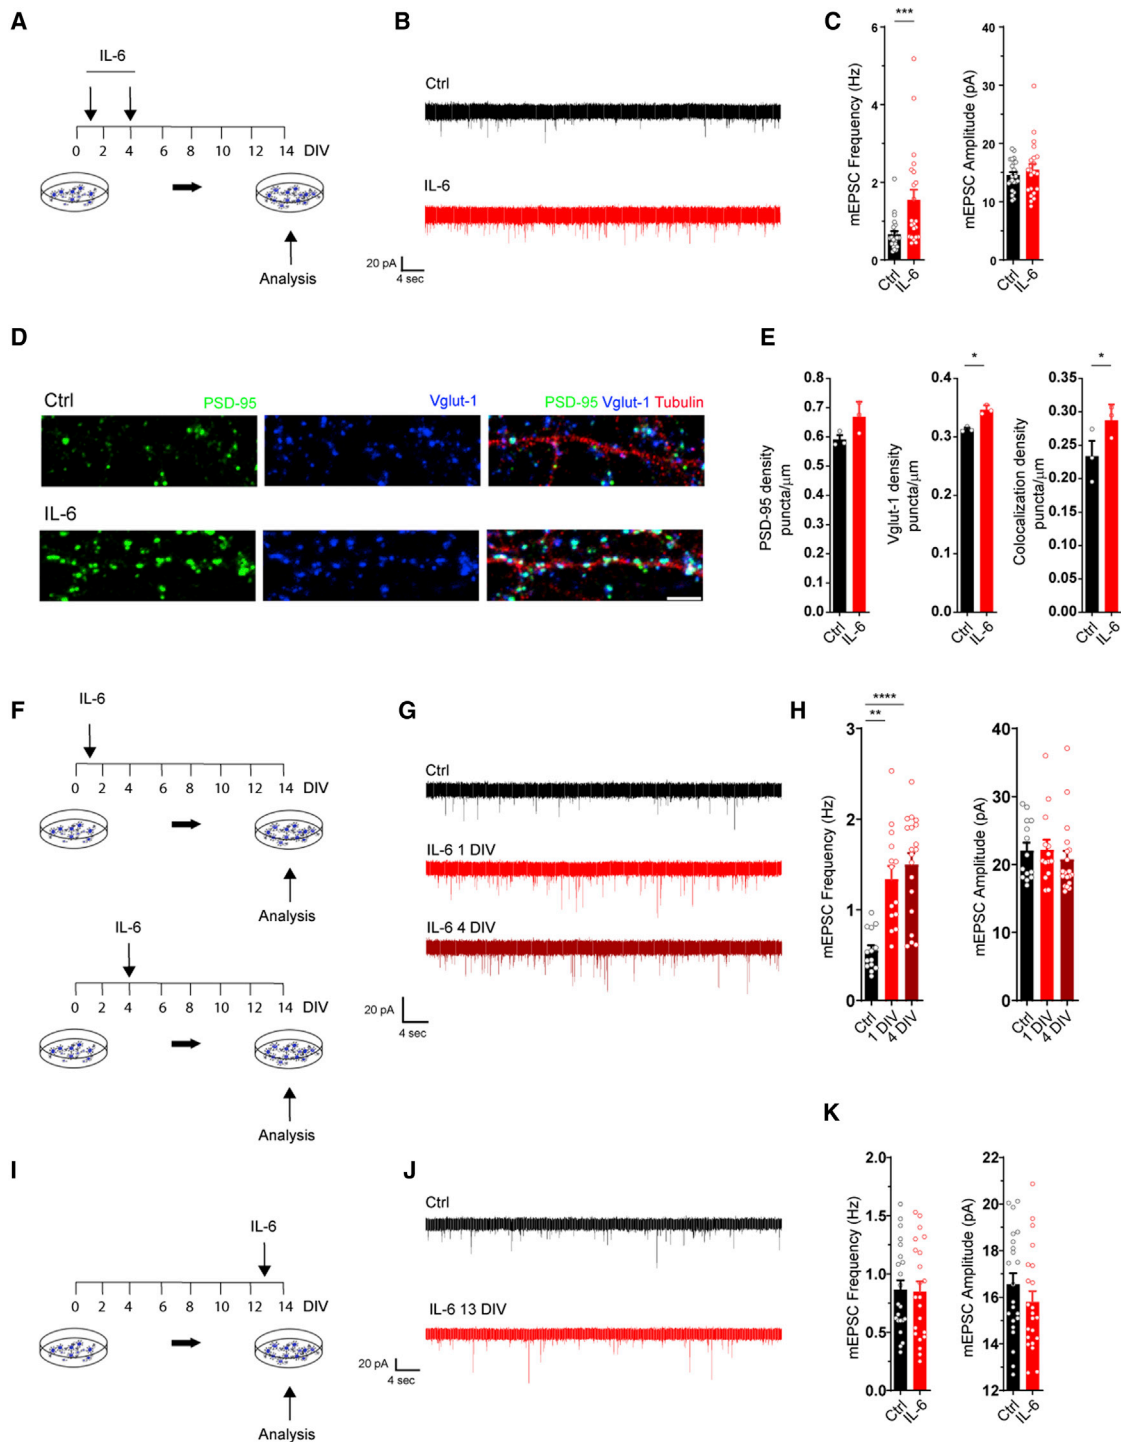

**Figure 4. A transient elevation of IL-6 at the early stage of neuronal development is sufficient to promote glutamatergic synaptogenesis**

(A) Experimental workflow: IL-6 at 10 ng/mL was added at early stages of neuronal development at 1 and 4 DIV. Neurons were assayed at 14 DIV.

(B) Electrophysiological traces of mEPSCs in neuronal cultures at 14 DIV under ctrl conditions and upon short (1–4 DIV) treatment with IL-6.

(C) Quantitative analysis of mEPSC frequency and amplitude under ctrl conditions and upon IL-6 treatment. Cells: ctrl, n = 24; IL-6, n = 22; 3 independent experiments; Mann-Whitney test; \*\*\*p = 0.0007.

(D) Immunofluorescence analysis of glutamatergic synaptic density using presynaptic (VGLUT1, blue) and postsynaptic (PSD-95, green) markers along a dendritic branch stained with beta III tubulin (red). Scale bar, 10  $\mu$ m.

(E) Quantitative analysis of PSD-95 (left panel) and VGLUT1 (center panel) and colocalizing punctum density (right panel) under both conditions (3 independent experiments). Dendrites analyzed: ctrl, n = 133; IL-6, n = 153; paired t test; \*p = 0.0328<sub>Vglut density</sub>, \*p = 0.0373<sub>Coloc density</sub>.

(legend continued on next page)



mEPSC but not mIPSC frequency (Figures 3B and 3C). Thus, the effect of IL-6 is sculpted intrinsically in neurons, even after their isolation from the brain context.

To assess whether IL-6 promotes synapse formation through specific action on neurons, primary cultures of embryonic hippocampal neurons were exposed to different IL-6 concentrations (1, 5, and 10 ng/mL) from 1–14 DIV, refreshing IL-6 every 3 days (Figure 3D), and analyzed through patch-clamp recording at 14 DIV (Figure 3E). Again, the frequency of mEPSCs, but not mIPSCs, was increased significantly upon incubation with IL-6 at 10 ng/mL (Figures 3F and 3G), reflecting an E/I imbalance even *in vitro*. No changes in passive membrane properties were observed (Figure S4A), indicating that the overall health state of neurons was not affected by the cytokine at this concentration. The increased glutamatergic basal transmission was accompanied by a higher number of mature excitatory synapses (Figure 3H) with no effect on the density of inhibitory synapses (Figures S4B and S4C).

The increase in mEPSCs frequency might, in principle, result from different mechanisms, including enhanced release probability at presynaptic terminals or homeostatic compensatory mechanisms (e.g., synaptic scaling) (Vereyken et al., 2007; Wierenga et al., 2006). We excluded these possibilities because short-term plasticity in synaptically connected neurons (Figure S4D; Maximov et al., 2007) and neuronal excitability (Bedogni et al., 2016; Pozzi et al., 2013) were not altered upon IL-6 treatment (Figures S4E, S4G, and S4H). Notably, the amplitude of postsynaptic currents (EPSCs) evoked by a single action potential was significantly higher in neurons exposed to IL-6 treatment (Figure S4F), in line with the increase in glutamatergic inputs (Chao et al., 2007).

To rule out a possible contribution of astrocytes to the enhanced excitatory neurotransmission, hippocampal cultures were grown in the presence of the anti-proliferative agent cytosine arabinoside (Ara-C), which reduces the astrocytic component by 97%, comparable with that of 1 DIV cultures (Figures S4I–S4K). Even under these conditions, IL-6 enhanced mEPSCs frequency (Figure S4L), indicating a negligible role of astrocytes. Furthermore, the lack of changes in the total number of cells as well as in the ratio between astrocytes and neurons in cultures chronically exposed to IL-6 (Figure S4M) excluded a role of the cytokine in changing the overall cellular composition of the culture. Finally, because primary neuronal cultures do not contain microglia unless added specifically (Figure S4N; Filipello et al., 2018), a role of these immune cells in the IL-6 effect can be ruled out.

### A single pulse of IL-6 at stages preceding synaptogenesis is sufficient to promote a long-lasting increase in glutamatergic synaptic transmission

To identify developmental stages more sensitive to IL-6, neuronal cultures were incubated with the cytokine at early stages of

neuronal development (1–4 DIV; Figure 4A). This treatment was sufficient to increase mEPSC frequency (Figures 4B and 4C) and glutamatergic synapse density at 14 DIV in hippocampal (Figures 4D and 4E) and cortical neurons (Figure S5A). Furthermore, even a single pulse of IL-6, applied before (1 DIV) or during (4 DIV) synaptogenesis (Figures 4F–4H) was sufficient to enhance excitatory transmission. Conversely, transient (Figures 4I–4K) or prolonged (Figure S5B) treatment at synaptically mature stages (13–21 DIV) failed to increase glutamatergic transmission. No modulation of synaptic transmission was observed upon acute application of IL-6 (Figure S5C). Transient IL-6 treatment was effective even in neuronal cultures established from embryos at E15 (Figure S5D), a stage far preceding onset of gliogenesis (Bedogni et al., 2016), when the amount of astrocytes is even lower (Figures S5E and S5F). Unlike IL-6, different proinflammatory cytokines, such as interferon  $\gamma$  (INF $\gamma$ ), tumor necrosis factor alpha (TNF- $\alpha$ ), and IL-1 $\beta$ , failed to enhance excitatory transmission (Figure S5G), indicating specificity of IL-6 as a pro-synaptogenic molecule.

Thus, transient IL-6 elevation at stages preceding synapse formation promotes long-lasting, selective enhancement of glutamatergic synapses without a crucial contribution from glial cells.

### STAT3 activity is required for the IL-6-dependent increase in glutamatergic synapses

IL-6 is known to activate a cascade of molecular events converging on activation of STAT3 (Heinrich et al., 2003). Accordingly, we found that STAT3 transcript and protein were enhanced in neuronal cultures upon IL-6 treatment at early stages of development (Figures 5A–5D), which also occurred in Ara-C-treated cultures (Figures 5C and 5D), indicating neuron-specific STAT3 activation. A significant increase in mean fluorescence intensity of the protein was also detected in the hippocampus upon prenatal IL-6 treatment for 24 h (Figure 5E), confirming STAT3 activation *in vivo* (Figures 5F and 5G).

STAT3 undergoes phosphorylation at two specific residues, tyrosine-705 (Tyr-705) and serine-727 (Ser-727), according to the kind of stimulation (Chung et al., 1997a, 1997b; Lim and Cao, 1999; Wen et al., 1995). A transient increase in phosphorylation at Tyr-705 (Figure 5H) was detected after acute IL-6 application to neuronal cultures (Figure 5I), whereas Ser-727 remained unaltered (Figure 5J). Accordingly, STAT3 phosphorylation at Tyr-705 was enhanced in embryonic cortices upon *i.c.v.* injection with IL-6 (Figure S5H).

IL-6-dependent signaling can be classified as classical or *trans*-signaling, according to which receptor, membrane-bound (mIL-6R) or soluble protein (sIL-6R), dimerizes with  $\beta$ -receptor subunit glycoprotein 130 (gp130), triggering a cascade of intracellular events (Hunter and Jones, 2015; Jones et al., 2001, 2011; Rothaug et al., 2016). In our cultures, expression of both receptors was up-regulated significantly upon IL-6 elevation (Figure S5I), whereas

(F) Experimental workflow: a single exposure of IL-6 10 ng/mL was applied at 1 DIV (top panel) or 4 DIV (bottom panel), and neurons were assayed at 14 DIV. (G and H) Representative traces (G) and quantitative analysis (H) of mEPSC frequency and amplitude at 14 DIV under ctrl conditions and upon single IL-6 exposure at the indicated time points. Cells: ctrl, n = 14; IL-6, 1 DIV, n = 14; IL-6, 4 DIV, n = 19; 3 independent experiments; one-way ANOVA on ranks followed by Dunn's multiple comparisons test; \*\*p = 0.0011; \*\*\*\*p = 0.00001.

(I) Experimental workflow: a single exposure of IL-6 (10 ng/mL) was performed at 13 DIV, and neurons were assayed at 14 DIV.

(J and K) Representative traces (J) and quantitative analysis (K) of mEPSC frequency and amplitude recorded at 14 DIV under ctrl conditions and upon single IL-6 exposure at later stages of development. Cells: ctrl, n = 22; IL-6, n = 22; 3 independent experiments.

See also Figures S5 and S6.

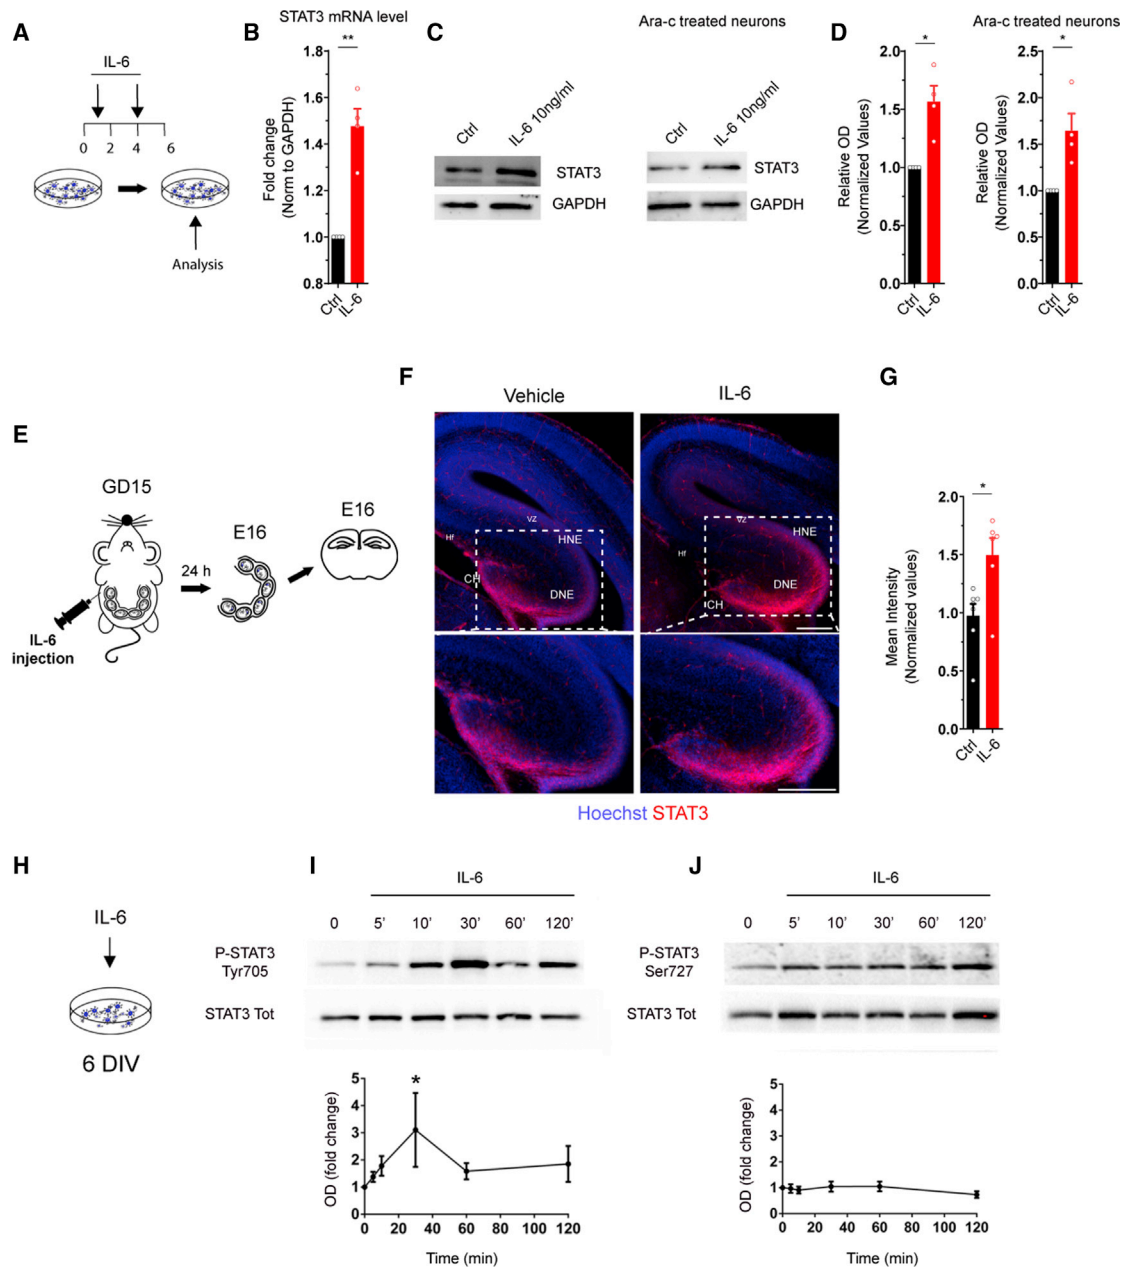

**Figure 5. IL-6 increases STAT3 transcript and protein in neurons and induces selective phosphorylation at Tyr-705**

(A) Experimental workflow: IL-6 at 10 ng/mL was added at 1 and 4 DIV, and neurons were collected at 6 DIV for the analysis.

(B) qPCR analysis of *Stat3* mRNA in ctrl and IL-6-treated cultures (4 independent experiments, one-sample t test, \*\* $p = 0.008$ ).

(C) Western blot analysis of STAT3 protein in ctrl and IL-6-treated neuronal cultures in the absence (with astrocytes, left panel) or presence of Ara-C (no astrocytes, right panel).

(D) Quantitative analysis of the optical density of STAT3 immunoreactive bands normalized by GAPDH in untreated (left graphs) and Ara-C-treated cultures (right graphs). Four independent experiments; one-sample t test; Ctrl cultures, \* $p = 0.025$ ; Ara-C cultures, \* $p = 0.041$ .

(E) Experimental workflow: a single pulse of vehicle (saline, as a ctrl) or IL-6 was injected i.p. into pregnant mothers on GD15 and the Hp of the embryo was analyzed 24 h after injection through immunofluorescence.

(F) Immunofluorescence of hippocampal regions stained with STAT3 (red) and Hoechst (blue), established from embryos on E16 exposed to vehicle or IL-6 on GD15 via maternal i.p. injection. VZ, ventricular zone; HNE, hippocampal neuroepithelium; DNE, dentate neuroepithelium; CH, cortical hem. Inset panels: higher magnification of the selected area. Scale bars, 250  $\mu\text{m}$ .

(G) Quantitative analysis of normalized STAT3 mean intensity in the Hp under the two conditions (vehicle,  $n = 7$  embryos; IL-6,  $n = 6$  embryos; Three independent experiments (3 litters); Student's t test; \* $p = 0.0129$ ).

(H) Cultured neurons at 6 DIV were treated acutely with IL-6 and collected at different time points for western blot analysis.

(legend continued on next page)

downregulation of IL-6R reduced constitutive STAT3 phosphorylation and prevented its activation upon IL-6 (Figure S5J), indicating specificity of this receptor for activation of IL-6-dependent intracellular pathways. A time course analysis showed that transcriptional expression of IL-6R and gp130 mRNA was stable at 5 and 10 DIV and underwent significant downregulation at 14 DIV (Figure S5K). *In vivo*, transcriptional expression of IL-6R increases steadily from E16 to P0 in the hippocampus and cortex, whereas gp130 undergoes strong downregulation at birth (Figures S5L and S5M). To discriminate which of the two pathways, classical or *trans*-signaling, was predominant in developing neurons, we exploited the recombinant soluble form of the GP130 receptor (sGP130) to interfere with the *trans*-signaling pathway (Jostock et al., 2001). We found that sGP130 did not affect IL-6-mediated phosphorylation of STAT3 in cultured neurons (Figure S5N), whereas in raw 264.7 cells, a monocyte/macrophage-like cell line known to produce and secrete high amounts of sIL-6R (Schumacher et al., 2015), sGP130 reduced STAT3 activation (Figure S5O). Accordingly, sIL-6R was detected only in the extracellular medium of raw 264.7 cells and not in cultured neurons at any developmental stage (Figure S5P). Hence, IL-6 primarily engaged classical signaling in developing neurons.

To assess the contribution of STAT3 activation to glutamatergic synaptogenesis, we used Stattic, a drug that selectively prevents STAT3 phosphorylation (Schust et al., 2006). Cultured neurons were transiently exposed to IL-6 (Figure S6A) in the presence of vehicle or 1  $\mu$ M Stattic, a concentration effective in blocking STAT3 phosphorylation (Figures 6A and 6B), without affecting neuronal survival (Figure S6B) or synaptic basal transmission (Figure S6C). Stattic occluded enhancement of mEPSC frequency (Figures 6C and 6D) and substantially prevented the increase in glutamatergic density (Figures 6E and 6F) induced by IL-6. Stattic also prevented the increase in glutamatergic transmission induced by chronic treatment with IL-6 (Figures S6D–S6F) without affecting the overall increase in the total amount of STAT3 protein (Figure S6G), indicating that IL-6-mediated upregulation of the transcription factor is not self-sustained by STAT3. Moreover, IL-6 did not change expression of a panel of pre- and postsynaptic proteins or expression of the transcription factor nuclear factor  $\kappa$ B (NF- $\kappa$ B), involved in many immune-dependent processes (Figure S6H). Finally, the transcription factor STAT3 is only induced transiently by IL-6 because transient application of IL-6 at early stages of development did not result in sustained upregulation of STAT3 protein at later stages (Figure S6I).

To demonstrate that STAT3 activation per se is sufficient to increase glutamatergic synapses in a neuron-autonomous fashion, we took advantage of two STAT3 mutant forms: the mutant Y705F, mimicking a constitutively unphosphorylated state of the protein (inactive form), and the mutant Y705E, mimicking a constitutively phosphorylated state (active form). Both STAT3 phospho mutants were translated as fusion proteins bearing a Myc tag, and the synaptic analysis was performed in sparse transfected neurons expressing the fusion proteins (Figure 6G). Analysis of PSD-95-positive punctum density in transfected neurons showed that Y705E, but not Y705F, significantly

increases PSD-95 density (Figure 6H). Thus, transient activation of STAT3 in neurons is required for the IL-6 effect on glutamatergic synapses.

### IL-6 promotes glutamatergic synaptogenesis through a STAT3-dependent genomic effect involving RGS4 activity

Recent evidence has shown cytoplasmic effects of STAT3 in neurons (Nicolas et al., 2012); hence, to exclude possible non-genomic mechanisms, the fungal metabolite galiellalactone, a selective STAT3 inhibitor able to prevent STAT3 binding to DNA (Weidler et al., 2000), was employed. 4  $\mu$ M galiellalactone was sufficient to block STAT3 genomic activity (Figure 6I) without affecting neuronal survival (Figure S7A), IL-6-dependent STAT3 phosphorylation (Figure S7B), or basal synaptic transmission (Figure S7C). 4  $\mu$ M galiellalactone (Figure S7D) was able to block the increase in mEPSC frequency induced by IL-6 (Figures 6J and 6K), demonstrating that the pro-synaptogenic effect of IL-6 required STAT3 genomic activity.

To identify the molecular pathways involved in IL-6-induced glutamatergic synaptogenesis, we investigated the overall transcriptional rearrangement induced by IL-6 through STAT3 activation by 10X single-cell transcriptomics. We assessed genome-wide expression profiling of 3,687 single cells isolated from cultured hippocampal neurons under ctrl conditions or upon IL-6 application (ctrl, 1,865; IL-6, 1,822) at 5 DIV (Figure S7E). The median number of genes detected per cell was 5,229 for IL-6 and 4,714 for ctrl, and the median number of transcripts (unique molecular identifiers [UMIs]) per cell was 22,011 and 17,572, respectively. Unsupervised clustering analysis identified eight distinct populations according to their gene transcriptional profiles (Figures 7A and 7C). In agreement with *in vivo* data, the clusters were represented under the two experimental conditions and overlapped substantially (Figure 7B), suggesting that changes in transcriptional profiling within each single cluster, rather than modifications of the distinct cell identities, occurred upon IL-6 treatment.

We systematically classified the cells by comparing their transcriptional profiles with the newly identified neuronal and non-neuronal markers from single-cell analysis performed in the developing hippocampus (Figure 2; Table S1) and by pre-existing signature gene sets of endogenous neuronal and glial types (Cahoy et al., 2008; Cembrowski et al., 2016; Harris et al., 2018; Lein et al., 2007) (see STAR Methods for details). We defined eight main transcriptionally distinct cell types reflecting the diversity of neuronal and non-neuronal classes found in the hippocampus (Cembrowski et al., 2016; Pelkey et al., 2017).

Based on this enrichment analysis, we found that two of the eight clusters belonged to the astrocyte lineage (cluster 1 [c1] and c2), expressing glial specific marker genes, including *Gfap* and *Aqp4*, with one of them showing markers of cycling cells (c2) (Figure S7F; Table S3). c0, c3, c4, c5, c6, and c7 displayed enrichment of neuron-specific genes, among others *Map2*, *Grin2b*, and *Syt4*, expressed in hippocampal neurons. Among them, c0 and c3 expressed specific markers for CA pyramidal

(I and J) Time course analysis of STAT3 phosphorylation at Tyr-705 (I) and Ser-727 (J) upon acute (30-min) IL-6 treatment at 6 DIV in cultured neurons. Values were normalized (bottom panels) against the total amount of STAT3 (4 independent experiments, Wilcoxon signed-rank test, \* $p = 0.0313$ ). See also Figure S5.

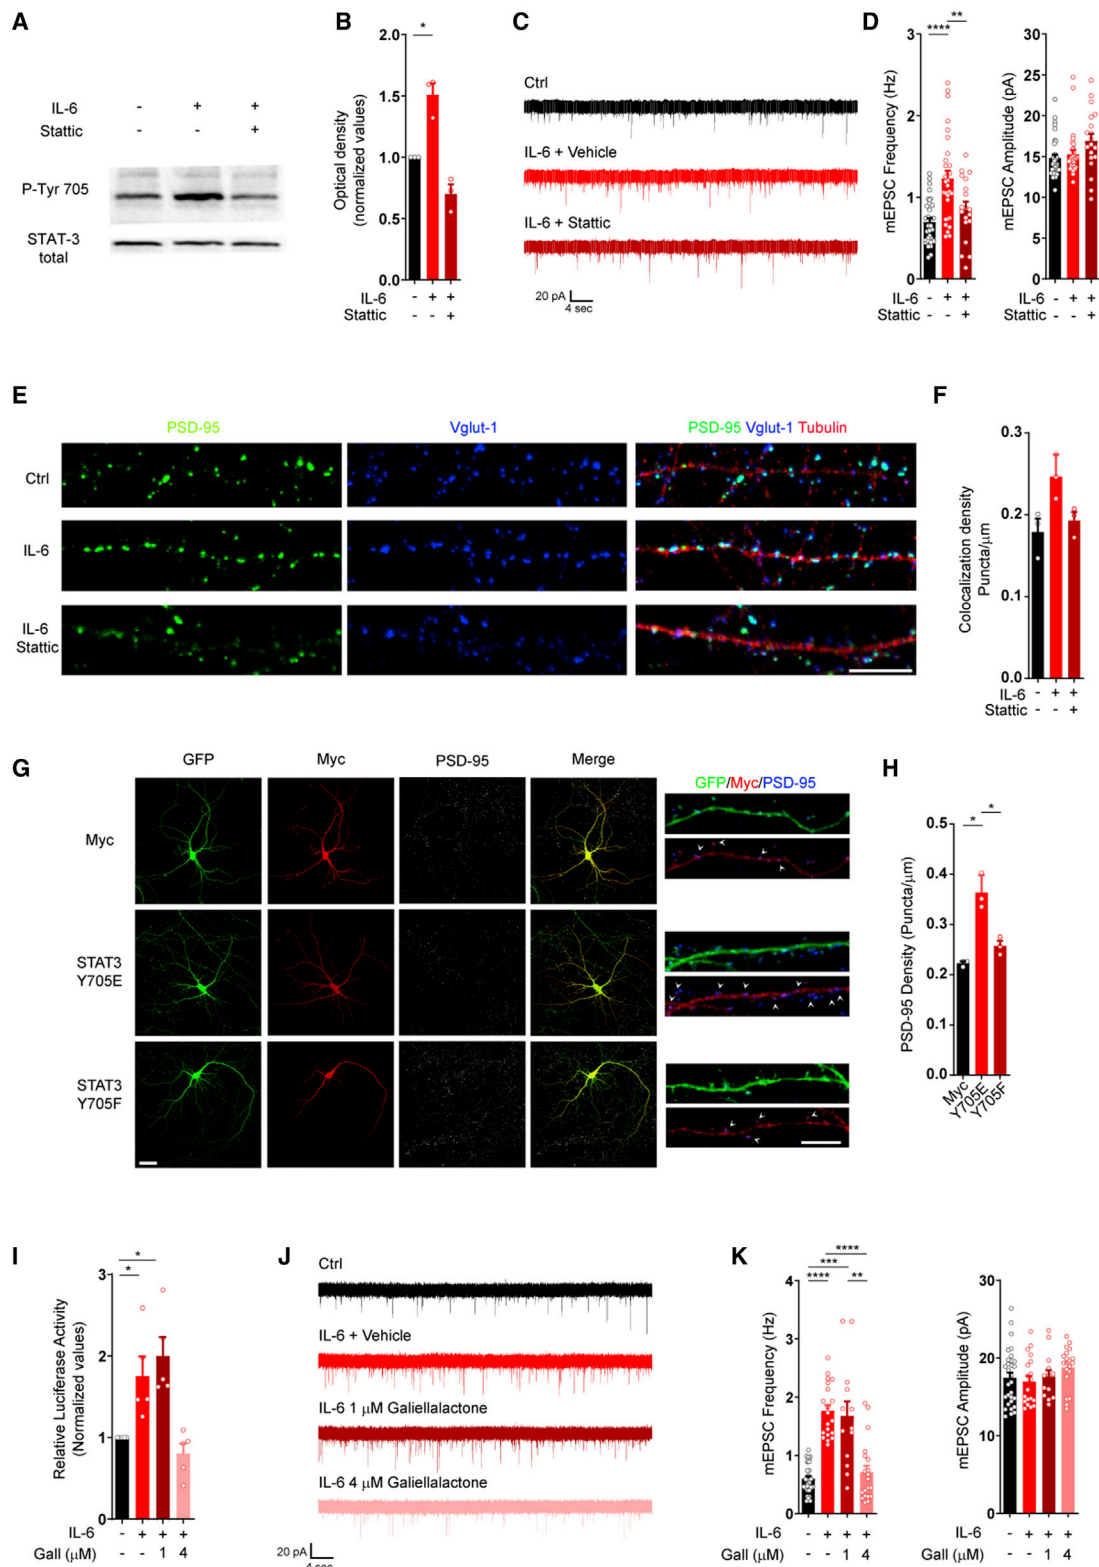

Mirabella et al., Fig 6

(legend on next page)

neurons (*Opcml* and *Crym*), and c4 and c5 showed enriched expression for DG neuronal markers (e.g., *Prox1*, *Calb2*, and *Sema3c*) (Figure S7F) and c7 for CR neurons. Only one cluster could be clearly ascribed to the GABAergic lineage (c6), expressing prototypical markers of GABAergic neurons, including *Gad2*, *ErbB4*, and *Lhx6* (Figures 7A and 7C; Figure S7F; Table S3; Mancinelli and Lodato, 2018). In terms of relative abundance of distinct cellular populations, the single-cell sequencing data also provided evidence that our *in vitro* culture system supports development of the different classes, while, at large, respecting the ratio of excitatory and inhibitory neurons and glial cells, which is appropriate for the developmental stage of the analysis (Lodato and Arlotta, 2015; Mancinelli and Lodato, 2018; Pelkey et al., 2017)

To further investigate the transcriptional changes induced by transient IL-6 application, we performed differential expression analysis between IL-6-stimulated and ctrl conditions. We identified 63 DEGs (adjusted p value cut-off of 0.05 and a log-fold changes (logfc) threshold of 0.20), with 55 upregulated and 8 downregulated upon IL-6 treatment (Table S4). As expected, *Stat3* gene expression was upregulated significantly ( $p \leq 0.05$ ), but only in the CA-ExN clusters (c0 and c3), indicating predominant involvement of CA pyramidal neurons upon IL-6 stimulation. IL-6-mediated *Stat3* expression was not subjected to any significant modifications in DG-ExN, astrocyte, or GABAergic clusters (Figures 7D and 7E).

To identify possible *Stat3* co-regulated genes, we combined an unbiased correlation analysis within neuronal clusters where *Stat3* was upregulated significantly (c0 and c3) with a differential analysis between IL-6-stimulated cultures and ctrls. Only four genes showed significant correlation with *Stat3* expression upon IL-6 treatment (Figure 7E, bottom). Among them, the highest correlation (positive) was found between *Stat3* and *Rgs4* (Pearson r correlation value = 0.31), indicating that, in clusters where *Stat3* was upregulated, *Rgs4* expression was increased concomitantly (Figures 7F and 7G), ranking at the top of significantly correlated

genes. This gene was highly enriched in neuronal clusters (Figure 7G). Furthermore, when we analyzed the promoter region of *Rgs4* using bioinformatics tools for transcription factor binding sites prediction (Khan et al., 2018; Sandelin et al., 2004), we found distinct putative sites containing Stat3 response elements predicted with a relative profile score threshold of 80% (Figure S7G). These results suggest that *Rgs4* could be a downstream target gene of STAT3 upon IL-6 stimulation.

The data obtained through the single-cell sequencing approach were then validated through qPCR quantitation of *Rgs4* mRNA transcripts in cultured neurons in which *Rgs4* was upregulated significantly upon IL-6 treatment via STAT3 genomic activity (Figure 7H). Also, STAT3-dependent RGS4 transcriptional elevation occurred in a cell-autonomous fashion because the only expression of the active form of STAT3 enhances RGS4 mRNA expression in N2A cell lines (Figure 7I-J).

To provide a causal link between RGS4 upregulation and the IL-6-mediated increase in glutamatergic synapses, neuronal cultures treated with IL-6 were incubated with the recently identified small molecule CCG-63802, a selective RGS4 inhibitor (Blazer et al., 2010; Figure S7H), at a dose not toxic to hippocampal neurons (Figure S7I). Inhibition of RGS4 prevented the IL-6-dependent enhancement of glutamatergic transmission at 14 DIV (Figures 7K and 7L), demonstrating that STAT3-dependent RGS4 elevation is required for the increase of glutamatergic synaptic contacts induced by IL-6.

To investigate whether STAT3 and RGS4 are engaged in *in vivo* models of prenatal inflammation, pregnant mice were injected i.p. on GD15 with IL-6 or polyinosinic:polycytidylic acid (poly(I:C)) (Figure 7M), a synthetic analog of viral double-stranded RNA, a well-established model of maternal immune activation (Choi et al., 2016; Corradini et al., 2018; Hsiao and Patterson, 2011; Shin Yim et al., 2017; Smith et al., 2007). Poly(I:C) was used at 2 mg/kg or 20 mg/kg, and expression of STAT3 and RGS4 mRNA was evaluated 24 h after injection in embryonic hippocampi (Figure 7M). Similar to IL-6 injection, poly(I:C), applied at

### Figure 6. STAT3 genomic activity is causally linked to the IL-6-dependent increase in glutamatergic synapses

(A) Western blot analysis of STAT3 phosphorylation in cultured neurons at 6 DIV treated acutely (30 min) with IL-6 in the absence or presence of Stattic (1  $\mu$ M). (B) Quantification of STAT3 phosphorylation normalized to total STAT3 protein amount. Ctrl, n = 3; IL-6, n = 3; 3 independent experiments; one-sample t test; \* $p = 0.019$ .

(C and D) Electrophysiological traces (C) and quantitative analysis (D) of mEPSC frequency and amplitude in cultured neurons at 14 DIV under ctrl conditions and upon application of IL-6 (see scheme in Figure S6A) in the presence of vehicle or 1  $\mu$ M Stattic. Ctrl, n = 33 cells; IL-6, n = 30 cells; IL-6, Stattic, n = 19 cells; 3 independent experiments; one-way ANOVA followed by Tukey's multiple comparisons test; \*\*\*\* $p = 0.000004$ , \*\* $p = 0.006$ .

(E) Immunofluorescence analysis of glutamatergic synaptic density through antibodies against presynaptic (VGLUT1, blue) and postsynaptic (PSD-95, red) markers along dendritic branches (beta III tubulin, red). Scale bar, 10  $\mu$ m.

(F) Quantitative analysis of colocalizing punctum density under the different conditions. Three independent experiments; dendrites analyzed: Ctrl, n = 117; IL-6, n = 130; IL-6 + Stattic, n = 88; one-way ANOVA on ranks followed by Turkey's multiple comparisons test).

(G) Representative images of hippocampal neurons expressing GFP together with myc alone (top panels), myc-flagged STAT3-phosphomutant Y705E (center panels), and myc-flagged STAT3-phosphomutant Y705F (bottom panels). Neurons were stained with antibodies against myc (red) and with PSD-95 (blue) to evaluate the density of postsynaptic puncta along the GFP-expressing (green) dendritic branches. High-magnification images are shown on the right; arrows indicate PSD-95-positive puncta. Scale bars: left panel, 20  $\mu$ m; right panel, 10  $\mu$ m.

(H) Quantitative analysis of PSD-95-positive punctum density and size under the three different conditions with respect to ctrl conditions. Three independent experiments; dendrites: Y705E = 33; Y705F = 30; Myc = 35; one-way ANOVA on ranks followed by Turkey's multiple comparisons test; Myc-T705E, \* $p = 0.034$ ; Myc-T705F, \* $p = 0.018$ .

(I) STAT3 luciferase reporter assay performed in cultured neurons stimulated with IL-6 for 48 h alone and in the presence of galiellalactone (1 and 4  $\mu$ M). Five independent experiments; one-sample t test; IL-6, \* $p = 0.0353$ ; IL-6 + galiellalactone (Gall; 1  $\mu$ M), \* $p = 0.0122$ .

(J and K) Representative electrophysiological traces (J) and quantitative analysis (K) of mEPSC frequency and amplitude in cultured neurons at 14 DIV under ctrl conditions and upon application of IL-6 with vehicle or Gall (Figure S7D). Cells: ctrl, n = 30; IL-6, n = 20; IL-6, Gall (1  $\mu$ M), n = 13; IL-6, Gall (4  $\mu$ M), n = 20; 3 independent experiments; one-way ANOVA on ranks followed by Dunn's multiple comparisons test; ctrl versus IL-6, \*\*\*\* $p = 1.01 \times 10^{-7}$ ; ctrl versus IL-6 + Gall (1  $\mu$ M), \*\*\*\* $p = 3.53 \times 10^{-4}$ ; IL-6 versus IL-6 + Gall (4  $\mu$ M), \*\*\*\* $p = 6.56 \times 10^{-6}$ ; IL-6 + Gall (1  $\mu$ M) versus IL-6 + Gall (4  $\mu$ M), \*\* $p = 0.0027$ .

See also Figures S6 and S7.

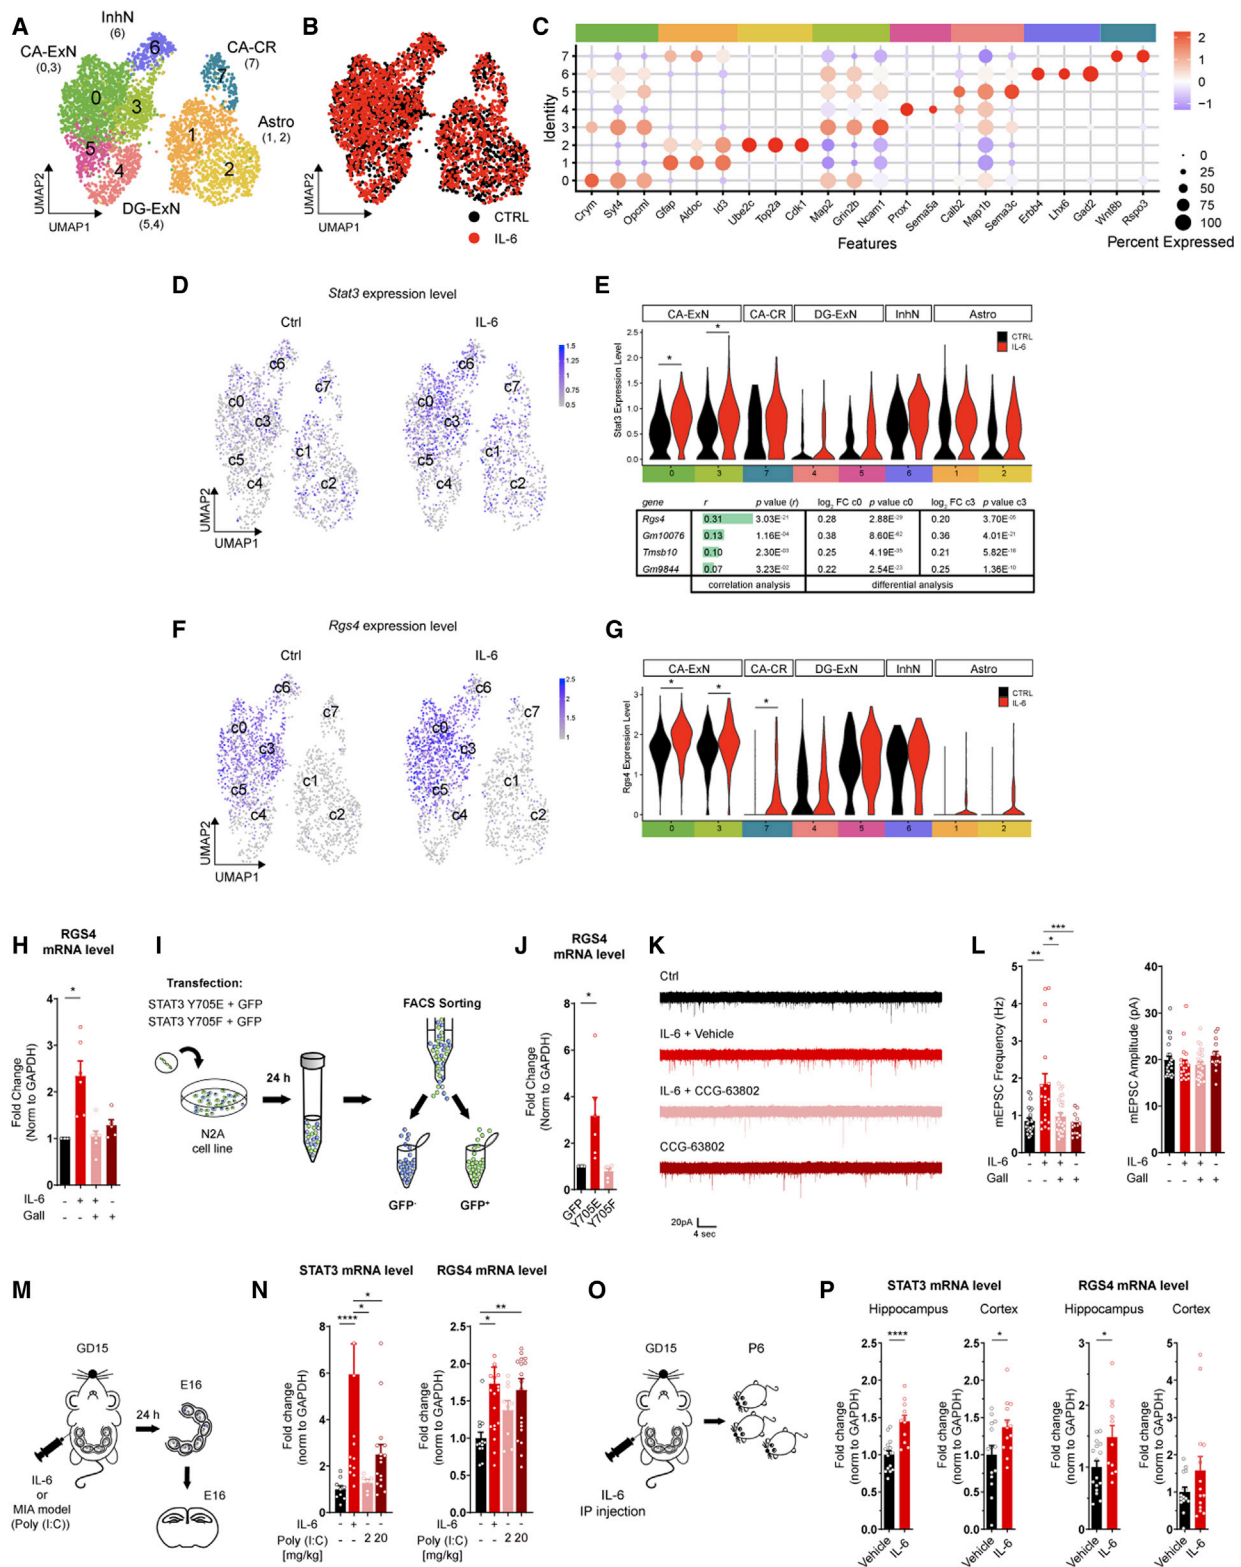

**Figure 7. *Rgs4* is upregulated in specific neuronal clusters upon IL-6 treatment and is required to increase glutamatergic synaptogenesis** (A) UMAP of all detected single cells. Each point represents a single cell, colored according to cluster designation. n = 3,687 individual cells. Clusters are labeled according to cell enrichment assessed by the AUCell R Bioconductor package (Figure S7E). (B) UMAP of all detected single cells, colored according to experimental condition. Black points, ctrl cells; red points, IL-6-treated cells.

(legend continued on next page)

20 mg/kg, promoted upregulation of STAT3 and RGS4 (Figure 7N). Also, higher transcriptional amounts of the two genes were detected in mice exposed prenatally to IL-6 at the postnatal stage (P6) (Figures 7O and 7P).

## DISCUSSION

Synapse formation is a key step in the brain developmental program. Environmental stressors acting at early stages—among all inflammatory conditions—may have long-term effects on physiological trajectories affecting brain connectivity and behavior in adulthood (Boulanger, 2009; Deverman and Patterson, 2009). Maternal inflammation, usually occurring as a transient phenomenon (Benedusi et al., 2015; Garetto et al., 2016; Kallikourdis, 2018; Munoz-Suano et al., 2012), has a long-range effect on brain development and is recognized as risk factor for neurodevelopmental diseases such as autism and schizophrenia (Boulanger-Bertolus et al., 2018; Estes and McAllister, 2016; Knuesel et al., 2014). However, the molecular underpinnings are still unknown. Here we show that transient elevation of IL-6 during prenatal development is sufficient to exert a long-lasting effect on glutamatergic synaptogenesis, resulting in excessive density of excitatory inputs and enhanced synaptic basal transmission. Although IL-6 elevation in models of prenatal immune activation engages different immune molecules (Choi et al., 2016; Shin Yim et al., 2017) through involvement of the maternal gut microbiota (Kim et al., 2017), leading to brain developmental defects (Choi et al., 2016; Shin Yim et al., 2017), here we show that direct injection of IL-6 into embryonic ventricles on E15 phenocopied the in-

creases in glutamatergic synapses produced by IL-6 in dams. Hence, besides engaging immune-related molecules in the mother, IL-6 can affect synapse formation directly in the embryonic brain, even in view of its capacity to cross the placenta barrier and reach the fetus (Dahlgren et al., 2006; Lim et al., 2021). The pro-synaptogenic effect is highly specific for IL-6.

The ability of IL-6 to enhance glutamatergic synapses in the offspring relies on early activation of specific biological processes linked to synaptogenesis in selected embryonic cell clusters identified as glutamatergic neurons. Different from non-neuronal cells and inhibitory neuron clusters, these glutamatergic clusters are abundant at this developmental stage and display the highest number of deregulated genes upon IL-6 treatment *in vivo*, likely being the main target for IL-6. The enhanced glutamatergic transmission is also detectable when neurons are isolated from the embryonic brain and grown *in vitro*, indicating that prenatal IL-6 increases the intrinsic capacity of glutamatergic neurons to form excitatory synapses. Besides activating key processes related to synaptogenesis, prenatal IL-6 resulted in modulation of pathways associated with energetic metabolism, suggesting acceleration of the metabolic reprogramming that normally occurs in immature postmitotic neurons during differentiation (Agostini et al., 2016; Zheng et al., 2016).

The increased number of excitatory but not inhibitory contacts in the offspring produced by prenatal IL-6 elevation is indicative of an E/I imbalance, a pathological hallmark of neurodevelopmental disorders (Lisman, 2012; Nelson and Valakh, 2015; O'Donnell et al., 2017; Sohal and Rubenstein, 2019) associated

(C) Dot plot showing average gene expression of selected markers used for cluster annotation.

(D) Feature plot showing *Stat3* gene expression split by treatment. Left panel: ctrl cells; right panel, IL-6-treated cells.

(E) Top: expression distribution (violin plots) showing log-transformed, normalized expression of the *Stat3* gene in all clusters grouped by cell type and colored according to experimental condition. Black points, ctrl cells; red points, IL-6-treated cells. \* $p \leq 0.05$ , Wilcoxon rank-sum test. Bottom: table showing Pearson  $r$  correlation values of genes correlated significantly with *Stat3* gene expression level in c0 and c3 of IL-6-treated cells and modulated significantly after IL-6 treatment in c0 and c3.

(F) Feature plots showing *Rgs4* gene expression split by treatment. Left panel: ctrl cells; right panel, IL-6-treated cells.

(G) Expression distribution (violin plots) showing log-transformed, normalized expression of the *Rgs4* gene in all clusters grouped by cell type and colored according to experimental condition. Black points, ctrl cells; red points, IL-6-treated cells; \* $p \leq 0.05$ ; Wilcoxon rank-sum test.

(H) qPCR analysis of *Rgs4* mRNA transcripts in cultured neurons at 6 DIV upon short IL-6 treatment (see scheme in Figure 4A) with and without 4  $\mu$ M Gall, normalized to GAPDH expression. Four independent experiments, one-sample  $t$  test, \* $p = 0.0389$ .

(I) Schematic workflow: N2A cell lines were co-transfected with plasmids coding for the STAT3 phosphomutants Y705E and Y705F together with GFP. After 24 h, GFP<sup>+</sup> cells were subjected to fluorescence-activated cell sorting (FACS) and assessed for RGS4 expression through qPCR analysis.

(J) Quantitative analysis of *Rgs4* mRNA transcripts normalized to GAPDH expression under the indicated conditions. Four independent experiments, one-sample  $t$  test, \* $p = 0.0411$ .

(K) Representative traces of mEPSCs recorded in cultured neurons at 14 DIV under ctrl conditions and upon application of IL-6 (see scheme in Figure S7H) in the presence or absence of the RGS4 inhibitor CCG-63802.

(L) Quantitative analysis of mEPSC frequency and amplitude under the indicated conditions. Cells: ctrl,  $n = 23$ ; IL-6,  $n = 20$ ; IL-6, CCG-63802 (CCG),  $n = 25$ ; CCG,  $n = 15$ ; 3 independent experiments; one-way ANOVA on ranks followed by Dunn's multiple comparisons test; \*\* $p = 0.0046$ , \* $p = 0.0391$ , \*\*\* $p = 0.0008$ .

(M) Experimental procedure used for the Maternal Immune Activation (MIA) model: a single pulse of vehicle (saline, as a ctrl), IL-6 (5  $\mu$ g), or poly(I:C) (at 2 or 20 mg/kg) was injected i.p. into pregnant mothers at GD15, and the Hp of embryos was analyzed 24 h after injection through qPCR analysis.

(N) Quantitative analysis of *Stat3* and *Rgs4* expression normalized to the total amount of *Gapdh* transcript in the Hp of embryos under the indicated conditions. *Stat3*: vehicle,  $n = 9$  embryos; IL-6,  $n = 16$  embryos; poly(I:C), 2 mg,  $n = 6$  embryos; poly(I:C), 20 mg,  $n = 16$  embryos; 2 independent experiments. *Rgs4*: vehicle,  $n = 13$  embryos; IL-6,  $n = 19$  embryos; poly(I:C), 2 mg,  $n = 9$  embryos; poly(I:C), 20 mg,  $n = 19$  embryos; 3 independent experiments; one-way ANOVA on ranks followed by Dunn's multiple comparisons test. *Stat3* analysis: vehicle-IL-6, \*\*\*\* $p = 0.00009$ ; vehicle-poly(I:C), 20 mg, \* $p = 0.03826$ ; vehicle-poly(I:C), 2 mg, \* $p = 0.01247$ . *Rgs4* analysis: \* $p = 0.0238$ , \*\* $p = 0.0073$ .

(O) Experimental procedure: a single pulse of vehicle (saline, as a ctrl) or IL-6 (5  $\mu$ g) was injected i.p. into pregnant mothers at GD15, and the Hp or cortex of pups was analyzed on P6 through qPCR analysis.

(P) Quantitative analysis of *Stat3* and *Rgs4* expression normalized to the total amount of *Gapdh* transcript in the Hp of embryos under the indicated conditions. *Stat3* mRNA level: Hp (vehicle,  $n = 16$  mice, Three independent experiments (3 litters); IL-6,  $n = 11$  mice,  $N = 2$  litters), cortex (vehicle,  $n = 14$  mice,  $N = 3$  litters; IL-6,  $n = 13$  mice,  $N = 3$  litters). *Rgs4* transcripts: Hp (vehicle,  $n = 16$  mice, Three independent experiments (3 litters); IL-6,  $n = 11$  mice,  $N = 2$  litters), cortex (vehicle,  $n = 15$  mice,  $N = 3$  litters; IL-6,  $n = 14$  mice,  $N = 3$  litters); Student's  $t$  test. *Stat3* analysis: \*\*\*\* $p = 0.00005$ , \* $p = 0.03$ . RGS4 analysis: \* $p = 0.0201$ .

See also Figure S7.

with altered brain functional connectivity (Ajram et al., 2017; Filippello et al., 2018; Pagani et al., 2019; Zhou et al., 2019). Similarly, genetic models of neurodevelopmental disorders display abnormal glutamatergic connections and altered brain connectivity (Xiong et al., 2012; Zaslavsky et al., 2019). Accordingly, we found an overall hyperconnectivity in the brain of adult mice exposed prenatally to IL-6, with particular involvement of the hippocampal regions. Although the cellular processes that are the basis of these alterations are totally unknown, it has been proposed that abnormal excitatory inputs in neural circuits contribute to aberrations in global brain connectivity (Deco et al., 2014; Markicevic et al., 2020). In our model, the highest glutamatergic connections were observed in the hippocampus and cortex, although the effect on the hippocampus was more pronounced. Cell-type-specific STAT3-dependent gene programs, region-specific onset of synaptogenesis, and cell-type-specific expression of IL-6R (Gadient and Otten, 1994) may be the basis of these differences.

Studies in humans have highlighted a clear link between prenatal inflammation and functional brain connectivity in the offspring (Iidaka et al., 2019; Supekar et al., 2013). Moreover, specific brain connectivity patterns in children reflected maternal elevation of IL-6 (Rudolph et al., 2018; Spann et al., 2018). Our findings provide a mechanistic framework for the detrimental effects induced by inflammation during pregnancy, with important implications for the clinical setting. For instance, in the “cytokines storm” induced by severe acute respiratory syndrome coronavirus 2 (SARS-CoV-2), the etiological agent of coronavirus disease 2019 (COVID-19), IL-6 is the major pro-inflammatory cytokine (Moore and June, 2020; Zhou et al., 2020) secreted by immune cells (Hunter and Jones, 2015; Jones and Hunter, 2021; Velazquez-Salinas et al., 2019). Although data so far did not highlight severe complications in pregnant women with SARS-CoV-2 (Wastnedge et al., 2021), our evidence prompts the need for long-term neurodevelopmental follow-up of newborns from women affected by SARS-CoV-2, especially in the case of infections occurring around the third trimester of gestation, when synaptogenesis starts in human embryos (Huttenlocher and Dabholkar, 1997).

IL-6 exerts its pro-synaptogenic effect by acting on the IL-6 receptor, which is expressed in the brain (Aniszewska et al., 2015; Gadient and Otten, 1993, 1996; Rothaug et al., 2016) and in hippocampal neurons (Gadient and Otten, 1994; Sawada et al., 1993; Vereyken et al., 2007). We found that IL-6R and gp130 are expressed steadily in neurons at early stages of development and undergo significant downregulation later on, providing a possible explanation for the selective pro-synaptogenic role of IL-6 in developing but not mature neurons. We also showed that developing neurons do not produce sIL-6R and are insensitive to sgp130 when challenged with IL-6, indicating that, at early stages of development, the IL-6 classical signaling mechanism is predominant. Previous findings in the mature brain indicated *trans*-signaling as the main mechanism of the pathological role of IL-6 (Campbell et al., 2014; Kraakman et al., 2015; Timper et al., 2017; Willis et al., 2020), suggesting that the two pathways might be engaged in a development-dependent fashion. The two receptors were detectable *in vivo* in the hippocampus and cortex at different prenatal stages, in line with other studies performed in rodent and human embryos (Barnabé-Heider et al., 2005;

Dame and Juul, 2000; Gallagher et al., 2013). Downregulation of gp130 was also observed in the hippocampus and cortex at P0, pointing to prenatal stages as the most vulnerable period, when neurons may be particularly sensitive to IL-6.

The long-lasting effect produced by IL-6 on glutamatergic synaptogenesis results from a transcriptional mechanism associated with a genomic rearrangement, in which the transcription factor STAT3 plays a central role. Although already studied in many different cellular contexts, including in the immune system (Jiang et al., 2014; Maritano et al., 2004), cancer (Yu et al., 2009), neuronal progenitors (Gallagher et al., 2013), and mature neurons (Fang et al., 2013; Leibinger et al., 2013a; Murase et al., 2012; Nicolas et al., 2012; Park et al., 2012), a direct role of STAT3 in synapse formation has never been demonstrated. We showed that STAT3 is activated transiently upon IL-6 elevation in neurons, and its genomic effect is causally linked with the increase in glutamatergic synapses, probably through transitory upregulation of synapse-specific genes at early developmental stages. STAT3 activation *in vitro* occurred in two specific *bona fide* glutamatergic cell clusters, distinct from GABAergic and non-neuronal clusters, which likely explains the selective action of the cytokine on ExNs.

We identified RGS4 as a STAT3 downstream neuronal gene responsible for the increase in excitatory synapses through single-cell transcriptomics. *RGS4* belongs to a gene family involved in regulation of G-coupled receptor-associated signaling (Bansal et al., 2007; Berman et al., 1996a, 1996b; Hepler et al., 1997). *RGS4* is the most abundant isoform in the CNS is expressed highly in the prefrontal cortex, hippocampus, thalamus and striatum (Ni et al., 1999; Nomoto et al., 1997), and is enriched mainly in neurons, along proximal apical dendrites, and at presynaptic terminals (Paspalas et al., 2009). Accordingly, our single-cell analysis revealed high *RGS4* expression in neuronal clusters, specifically in those where STAT3 was upregulated.

Although *RGS4* is known to modulate multiple aspects of neuronal physiology, including synaptic transmission and plasticity in mature neurons (Gerber et al., 2016), few studies have investigated its possible involvement in neuronal development (Cheng et al., 2013; Pallaki et al., 2017). We provided evidence that *RGS4* expression is dependent on STAT3 genomic activity and that its activation is crucial for IL-6-mediated enhancement of excitatory synapses. Given the importance of G-protein signaling in neuronal development (Munno et al., 2003; Shelly et al., 2010), we propose *RGS4* as an additional player in the process of glutamatergic synaptogenesis, when its early upregulation might modulate G-protein-dependent intracellular signaling, affecting the intrinsic capacity of neurons to form excitatory synapses. In line with this hypothesis, a recent study highlighted a prominent role of G-protein-coupled receptor signaling in hippocampal synaptogenesis (Sando and Südhof, 2021). *RGS4* gene polymorphisms (Chowdari et al., 2002; Shirts and Nimgaonkar, 2004; Talkowski et al., 2006) and alterations of the protein amount (Dean et al., 2009; Erdely et al., 2006; Schwarz, 2018) have been detected in individuals affected by schizophrenia, (Levitt et al., 2006). Also, allelic variation of the *rgs4* gene is associated with altered functional and structural brain connectivity in humans (Buckholtz et al., 2007). It is now established that autism and schizophrenia are neurodevelopmental pathological conditions characterized by aberrant synaptic connectivity (Frankle



et al., 2003; Glausier and Lewis, 2013; Konopaske et al., 2014; Penzes et al., 2011; Zuccaro et al., 2021). Given the importance of maternal immune activation as a risk factor for neurodevelopmental disorders (Bauman et al., 2014; Estes and McAllister, 2016; Giovanoli et al., 2016; Lipina et al., 2013; Malkova et al., 2012; Missault et al., 2014), upregulation of STAT3 and RGS4 indicates critical involvement of these two genes in inducing long-term consequences for synaptic density and brain connectivity in prenatal inflammatory conditions. Given the current lack of pharmacological tools for prevention of neurodevelopmental disorders, these results represent a promising perspective in identification of druggable pathways for early interventional strategies.

### Limitation of the study

Our data point to a direct role of IL-6 in neurons, specifically occurring at stages shortly preceding synaptogenesis. The effects of IL-6 are reproduced in pure neuronal cultures and even in neurons established from brains on E15, a stage far preceding onset of gliogenesis. Despite this evidence being well supported using the *in vitro* system, other cell types being involved *in vivo* cannot be completely ruled out. Prenatal IL-6 elevation in embryos genetically devoid of IL-6R expression in distinct cell types would be a valuable strategy to address this issue. A second limitation relies on the causal role of STAT3 and RGS4 and altered synaptogenesis in maternal immune activation models, which was not fully addressed in this study. Ablation of STAT3 *in vivo* leads to embryonic lethality (Takeda et al., 1997); hence, interference with the activity of this transcriptional factor *in vivo* (especially at early stages of development) might lead to neuronal damage, making it difficult to clarify the precise contribution of STAT3 to the IL-6-mediated effect.

### STAR★METHODS

Detailed methods are provided in the online version of this paper and include the following:

- KEY RESOURCES TABLE
- RESOURCE AVAILABILITY
  - Lead contact
  - Materials availability
  - Data and code availability
- EXPERIMENTAL MODEL AND SUBJECT DETAILS
  - Mice
  - Primary cultures and cell lines
- METHOD DETAILS
  - IL-6 and Poly(I:C) injection in dams
  - In utero electroporation
  - Drugs and Reagents
  - Calcium imaging
  - Electrophysiology
  - Biochemistry
  - Immunofluorescence analysis
  - Nissl staining
  - Lentiviral infection
  - ELISA
  - Magnetic resonance imaging
  - Resting-state fMRI

- Diffusion MRI
- Behavioral analyses
- Luciferase assay
- Quantitative RT-PCR
- Fluorescence Activated Cell Sorting (FACS) analysis
- Single cell sequencing
- Promoter sequence analysis
- Single cell markers identification and differential expression

### ● QUANTIFICATION AND STATISTICAL ANALYSIS

### SUPPLEMENTAL INFORMATION

Supplemental information can be found online at <https://doi.org/10.1016/j.immuni.2021.10.006>.

### ACKNOWLEDGMENTS

We thank Prof. Valeria Poli (Department of Molecular Biotechnology and Health Sciences, University of Turin, Italy) for kindly providing all plasmids coding for the phosphomimetic mutants of STAT3 and Dr. Marinos Kallikourdis for intellectual input and comments on the manuscript. This work was supported by PRIN (Ministero dell'Istruzione dell'Università e della Ricerca; 2017 A9MK4R); FISM 2019/R-Single/032, The Ferring COVID-19 Investigational Grants in Reproductive Medicine and Maternal Health (RMMH), and Fondazione Cassa di Risparmio di Pisa "Studio traslazionale dell'infiammazione nell'invecchiamento" (to M.M.); Telethon Foundation GGP19226A (to D.P.); RF2018-12365280 and Cariplo Foundation 2019-1785 (to S.L.), and Cariplo Foundation 2017-0622 (to E.M.). We also thank the Monzino Foundation (Milano, Italy) for its generous gift of the Zeiss LSM800 confocal microscope to the Milan section of the Institute of Neuroscience.

### AUTHOR CONTRIBUTIONS

F.M. performed and analyzed electrophysiological, biochemical and immunofluorescence experiments. G.D. performed and analyzed qPCR experiments. G.F. performed *in vitro* immunofluorescence experiments and analyses. S.M. performed the intracerebroventricular injections into embryos, *in utero* electroporation surgery and analyses, and *in vivo* immunofluorescence analyses. M.R. and F.M. performed the *in vivo* injections into pregnant mice. S.M., S.L., and D.P. performed, analyzed, and interpreted the single-cell sequencing data for the *in vivo* data. C.P. performed the single-cell sequencing experiment. P.K. and A.T. analyzed and interpreted the single-cell sequencing data. R.M. performed the *ex vivo* electrophysiological recordings. M. Markicevic, C.G., and V.Z. performed the functional connectivity experiments and data analyses. E.M. performed acquisition and analysis of the immunofluorescence experiments. M.M., D.P., and F.M. designed, analyzed, and interpreted the data. M.M. and D.P. conceived the study and wrote the manuscript.

### DECLARATION OF INTERESTS

The authors declare no competing interests.

Received: February 18, 2020

Revised: April 24, 2021

Accepted: October 7, 2021

Published: November 9, 2021

### REFERENCES

- Agostini, M., Romeo, F., Inoue, S., Niklison-Chirou, M.V., Elia, A.J., Dinsdale, D., Morone, N., Knight, R.A., Mak, T.W., and Melino, G. (2016). Metabolic reprogramming during neuronal differentiation. *Cell Death Differ.* 23, 1502–1514.
- Ajam, L.A., Horder, J., Mendez, M.A., Galanopoulos, A., Brennan, L.P., Wichers, R.H., Robertson, D.M., Murphy, C.M., Zinkstok, J., Ivin, G., et al. (2017). Shifting brain inhibitory balance and connectivity of the prefrontal cortex of adults with autism spectrum disorder. *Transl. Psychiatry* 7, e1137.

- Angevine, J.B., Jr. (1965). Time of neuron origin in the hippocampal region. An autoradiographic study in the mouse. *Exp. Neurol. Suppl* 2, 1–70.
- Aniszewska, A., Chłodzińska, N., Bartkowska, K., Winnicka, M.M., Turlejski, K., and Djavadian, R.L. (2015). The expression of interleukin-6 and its receptor in various brain regions and their roles in exploratory behavior and stress responses. *J. Neuroimmunol.* 284, 1–9.
- Balschun, D., Wetzel, W., Del Rey, A., Pitossi, F., Schneider, H., Zuschratter, W., and Besedovsky, H.O. (2004). Interleukin-6: a cytokine to forget. *FASEB J.* 18, 1788–1790.
- Bansal, G., Druey, K.M., and Xie, Z. (2007). R4 RGS proteins: regulation of G-protein signaling and beyond. *Pharmacol. Ther.* 116, 473–495.
- Barnabé-Heider, F., Wasylka, J.A., Fernandes, K.J., Porsche, C., Sendtner, M., Kaplan, D.R., and Miller, F.D. (2005). Evidence that embryonic neurons regulate the onset of cortical gliogenesis via cardiotrophin-1. *Neuron* 48, 253–265.
- Bauer, S., Kerr, B.J., and Patterson, P.H. (2007). The neuropoietic cytokine family in development, plasticity, disease and injury. *Nat. Rev. Neurosci.* 8, 221–232.
- Bauman, M.D., Iosif, A.M., Smith, S.E., Bregere, C., Amaral, D.G., and Patterson, P.H. (2014). Activation of the maternal immune system during pregnancy alters behavioral development of rhesus monkey offspring. *Biol. Psychiatry* 75, 332–341.
- Beckmann, C.F., and Smith, S.M. (2004). Probabilistic independent component analysis for functional magnetic resonance imaging. *IEEE Trans. Med. Imaging* 23, 137–152.
- Bedogni, F., Cobolli Gigli, C., Pozzi, D., Rossi, R.L., Scaramuzza, L., Rossetti, G., Pagani, M., Kilstrup-Nielsen, C., Matteoli, M., and Landsberger, N. (2016). Defects During Mecp2 Null Embryonic Cortex Development Precede the Onset of Overt Neurological Symptoms. *Cereb. Cortex* 26, 2517–2529.
- Benedusi, V., Martini, E., Kallikourdis, M., Villa, A., Meda, C., and Maggi, A. (2015). Ovariectomy shortens the life span of female mice. *Oncotarget* 6, 10801–10811.
- Bergink, V., Gibney, S.M., and Drexhage, H.A. (2014). Autoimmunity, inflammation, and psychosis: a search for peripheral markers. *Biol. Psychiatry* 75, 324–331.
- Berman, D.M., Kozasa, T., and Gilman, A.G. (1996a). The GTPase-activating protein RGS4 stabilizes the transition state for nucleotide hydrolysis. *J. Biol. Chem.* 271, 27209–27212.
- Berman, D.M., Wilkie, T.M., and Gilman, A.G. (1996b). GAIP and RGS4 are GTPase-activating proteins for the Gi subfamily of G protein alpha subunits. *Cell* 86, 445–452.
- Blazer, L.L., Roman, D.L., Chung, A., Larsen, M.J., Greedy, B.M., Husbands, S.M., and Neubig, R.R. (2010). Reversible, allosteric small-molecule inhibitors of regulator of G protein signaling proteins. *Mol. Pharmacol.* 78, 524–533.
- Boulanger-Bertolus, J., Pancaro, C., and Mashour, G.A. (2018). Increasing Role of Maternal Immune Activation in Neurodevelopmental Disorders. *Front. Behav. Neurosci.* 12, 230.
- Boulanger, L.M. (2009). Immune proteins in brain development and synaptic plasticity. *Neuron* 64, 93–109.
- Buckholtz, J.W., Meyer-Lindenberg, A., Honea, R.A., Straub, R.E., Pezawas, L., Egan, M.F., Vakkalanka, R., Kolachana, B., Verchinski, B.A., Sult, S., et al. (2007). Allelic variation in RGS4 impacts functional and structural connectivity in the human brain. *J. Neurosci.* 27, 1584–1593.
- Butler, A., Hoffman, P., Smibert, P., Papalexi, E., and Satija, R. (2018). Integrating single-cell transcriptomic data across different conditions, technologies, and species. *Nat. Biotechnol.* 36, 411–420.
- Cafferty, W.B., Gardiner, N.J., Das, P., Qiu, J., McMahon, S.B., and Thompson, S.W. (2004). Conditioning injury-induced spinal axon regeneration fails in interleukin-6 knock-out mice. *J. Neurosci.* 24, 4432–4443.
- Cahoy, J.D., Emery, B., Kaushal, A., Foo, L.C., Zamanian, J.L., Christopherson, K.S., Xing, Y., Lubischer, J.L., Krieg, P.A., Krupenko, S.A., et al. (2008). A transcriptome database for astrocytes, neurons, and oligodendrocytes: a new resource for understanding brain development and function. *J. Neurosci.* 28, 264–278.
- Campbell, I.L., Erta, M., Lim, S.L., Frausto, R., May, U., Rose-John, S., Scheller, J., and Hidalgo, J. (2014). Trans-signaling is a dominant mechanism for the pathogenic actions of interleukin-6 in the brain. *J. Neurosci.* 34, 2503–2513.
- Cembrowski, M.S., Wang, L., Sugino, K., Shields, B.C., and Spruston, N. (2016). Hipposeq: a comprehensive RNA-seq database of gene expression in hippocampal principal neurons. *eLife* 5, e14997.
- Chao, H.T., Zoghbi, H.Y., and Rosenmund, C. (2007). MeCP2 controls excitatory synaptic strength by regulating glutamatergic synapse number. *Neuron* 56, 58–65.
- Cheng, Y.C., Scotting, P.J., Hsu, L.S., Lin, S.J., Shih, H.Y., Hsieh, F.Y., Wu, H.L., Tsao, C.L., and Shen, C.J. (2013). Zebrafish rgs4 is essential for motility and axonogenesis mediated by Akt signaling. *Cell. Mol. Life Sci.* 70, 935–950.
- Choi, G.B., Yim, Y.S., Wong, H., Kim, S., Kim, H., Kim, S.V., Hoeffer, C.A., Littman, D.R., and Huh, J.R. (2016). The maternal interleukin-17a pathway in mice promotes autism-like phenotypes in offspring. *Science* 351, 933–939.
- Chowdari, K.V., Mimics, K., Semwal, P., Wood, J., Lawrence, E., Bhatia, T., Deshpande, S.N., B K, T., Ferrell, R.E., Middleton, F.A., et al. (2002). Association and linkage analyses of RGS4 polymorphisms in schizophrenia. *Hum. Mol. Genet.* 11, 1373–1380.
- Chung, C.D., Liao, J., Liu, B., Rao, X., Jay, P., Berta, P., and Shuai, K. (1997a). Specific inhibition of Stat3 signal transduction by PIAS3. *Science* 278, 1803–1805.
- Chung, J., Uchida, E., Grammer, T.C., and Blenis, J. (1997b). STAT3 serine phosphorylation by ERK-dependent and -independent pathways negatively modulates its tyrosine phosphorylation. *Mol. Cell. Biol.* 17, 6508–6516.
- Cline, H. (2005). Synaptogenesis: a balancing act between excitation and inhibition. *Curr. Biol.* 15, R203–R205.
- Corradini, I., Focchi, E., Rasile, M., Morini, R., Desiato, G., Tomasoni, R., Lizier, M., Ghirardini, E., Fesce, R., Morone, D., et al. (2018). Maternal Immune Activation Delays Excitatory-to-Inhibitory Gamma-Aminobutyric Acid Switch in Offspring. *Biol. Psychiatry* 83, 680–691.
- Courchesne, E., Pierce, K., Schumann, C.M., Redcay, E., Buckwalter, J.A., Kennedy, D.P., and Morgan, J. (2007). Mapping early brain development in autism. *Neuron* 56, 399–413.
- Dahlgren, J., Samuelsson, A.M., Jansson, T., and Holmäng, A. (2006). Interleukin-6 in the maternal circulation reaches the rat fetus in mid-gestation. *Pediatr. Res.* 60, 147–151.
- Dame, J.B., and Juul, S.E. (2000). The distribution of receptors for the pro-inflammatory cytokines interleukin (IL)-6 and IL-8 in the developing human fetus. *Early Hum. Dev.* 58, 25–39.
- Dean, B., Boer, S., Gibbons, A., Money, T., and Scarr, E. (2009). Recent advances in postmortem pathology and neurochemistry in schizophrenia. *Curr. Opin. Psychiatry* 22, 154–160.
- Deco, G., Ponce-Alvarez, A., Hagmann, P., Romani, G.L., Mantini, D., and Corbetta, M. (2014). How local excitation-inhibition ratio impacts the whole brain dynamics. *J. Neurosci.* 34, 7886–7898.
- Deverman, B.E., and Patterson, P.H. (2009). Cytokines and CNS development. *Neuron* 64, 61–78.
- Durand, C.M., Betancur, C., Boeckers, T.M., Bockmann, J., Chaste, P., Fauchereau, F., Nygren, G., Rastam, M., Gillberg, I.C., Anckarsäter, H., et al. (2007). Mutations in the gene encoding the synaptic scaffolding protein SHANK3 are associated with autism spectrum disorders. *Nat. Genet.* 39, 25–27.
- Erdely, H.A., Tamminga, C.A., Roberts, R.C., and Vogel, M.W. (2006). Regional alterations in RGS4 protein in schizophrenia. *Synapse* 59, 472–479.
- Erta, M., Quintana, A., and Hidalgo, J. (2012). Interleukin-6, a major cytokine in the central nervous system. *Int. J. Biol. Sci.* 8, 1254–1266.
- Estes, M.L., and McAllister, A.K. (2016). Maternal immune activation: Implications for neuropsychiatric disorders. *Science* 353, 772–777.
- Fang, X.X., Jiang, X.L., Han, X.H., Peng, Y.P., and Qiu, Y.H. (2013). Neuroprotection of interleukin-6 against NMDA-induced neurotoxicity is mediated by JAK/STAT3, MAPK/ERK, and PI3K/AKT signaling pathways. *Cell. Mol. Neurobiol.* 33, 241–251.

- Filipello, F., Morini, R., Corradini, I., Zerbi, V., Canzi, A., Michalski, B., Erreni, M., Markicevic, M., Starvaggi-Cucuzza, C., Otero, K., et al. (2018). The Microglial Innate Immune Receptor TREM2 Is Required for Synapse Elimination and Normal Brain Connectivity. *Immunity* 48, 979–991.e8.
- Filippini, N., MacIntosh, B.J., Hough, M.G., Goodwin, G.M., Frisoni, G.B., Smith, S.M., Matthews, P.M., Beckmann, C.F., and Mackay, C.E. (2009). Distinct patterns of brain activity in young carriers of the APOE-epsilon4 allele. *Proc. Natl. Acad. Sci. USA* 106, 7209–7214.
- Finak, G., McDavid, A., Yajima, M., Deng, J., Gersuk, V., Shalek, A.K., Slichter, C.K., Miller, H.W., McElrath, M.J., Pric, M., et al. (2015). MAST: a flexible statistical framework for assessing transcriptional changes and characterizing heterogeneity in single-cell RNA sequencing data. *Genome Biol* 16, 278. As attached file, please find the new version of the references with the missing citation.
- Finlay, B.L., and Darlington, R.B. (1995). Linked regularities in the development and evolution of mammalian brains. *Science* 268, 1578–1584.
- Fontana, C., Marasca, F., Provitera, L., Mancinelli, S., Pesenti, N., Sinha, S., Passera, S., Abrignani, S., Mosca, F., Lodato, S., et al. (2021). Early maternal care restores LINE-1 methylation and enhances neurodevelopment in preterm infants. *BMC Med.* 19, 42.
- Frankle, W.G., Lerma, J., and Laruelle, M. (2003). The synaptic hypothesis of schizophrenia. *Neuron* 39, 205–216.
- Gadient, R.A., and Otten, U. (1993). Differential expression of interleukin-6 (IL-6) and interleukin-6 receptor (IL-6R) mRNAs in rat hypothalamus. *Neurosci. Lett.* 153, 13–16.
- Gadient, R.A., and Otten, U. (1994). Expression of interleukin-6 (IL-6) and interleukin-6 receptor (IL-6R) mRNAs in rat brain during postnatal development. *Brain Res.* 637, 10–14.
- Gadient, R.A., and Otten, U. (1996). Postnatal expression of interleukin-6 (IL-6) and IL-6 receptor (IL-6R) mRNAs in rat sympathetic and sensory ganglia. *Brain Res.* 724, 41–46.
- Gallagher, D., Norman, A.A., Woodard, C.L., Yang, G., Gauthier-Fisher, A., Fujitani, M., Vessey, J.P., Cancino, G.I., Sachewsky, N., Woltjen, K., et al. (2013). Transient maternal IL-6 mediates long-lasting changes in neural stem cell pools by deregulating an endogenous self-renewal pathway. *Cell Stem Cell* 13, 564–576.
- Garetto, S., Sardi, C., Martini, E., Roselli, G., Morone, D., Angioni, R., Cianciotti, B.C., Trovato, A.E., Franchina, D.G., Castino, G.F., et al. (2016). Tailored chemokine receptor modification improves homing of adoptive therapy T cells in a spontaneous tumor model. *Oncotarget* 7, 43010–43026.
- Gatto, C.L., and Broadie, K. (2010). Genetic controls balancing excitatory and inhibitory synaptogenesis in neurodevelopmental disorder models. *Front. Synaptic Neurosci.* 2, 4.
- Gerber, K.J., Squires, K.E., and Hepler, J.R. (2016). Roles for Regulator of G Protein Signaling Proteins in Synaptic Signaling and Plasticity. *Mol. Pharmacol.* 89, 273–286.
- Giovanoli, S., Engler, H., Engler, A., Richetto, J., Feldon, J., Riva, M.A., Schedlowski, M., and Meyer, U. (2016). Preventive effects of minocycline in a neurodevelopmental two-hit model with relevance to schizophrenia. *Transl. Psychiatry* 6, e772.
- Glausier, J.R., and Lewis, D.A. (2013). Dendritic spine pathology in schizophrenia. *Neuroscience* 257, 90–107.
- Grabrucker, A.M. (2013). Environmental factors in autism. *Front. Psychiatry* 3, 118.
- Grandjean, J., Schroeter, A., Batata, I., and Rudin, M. (2014). Optimization of anesthesia protocol for resting-state fMRI in mice based on differential effects of anesthetics on functional connectivity patterns. *Neuroimage* 102, 838–847.
- Hagenbuch, N., Feldon, J., and Yee, B.K. (2006). Use of the elevated plus-maze test with opaque or transparent walls in the detection of mouse strain differences and the anxiolytic effects of diazepam. *Behav. Pharmacol.* 17, 31–41.
- Harris, K.D., Hochgerner, H., Skene, N.G., Magno, L., Katona, L., Bengtsson Gonzales, C., Somogyi, P., Kessaris, N., Linnarsson, S., and Hjerling-Leffler, J. (2018). Classes and continua of hippocampal CA1 inhibitory neurons revealed by single-cell transcriptomics. *PLoS Biol.* 16, e2006387.
- Heinrich, P.C., Behrmann, I., Haan, S., Hermanns, H.M., Müller-Newen, G., and Schaper, F. (2003). Principles of interleukin (IL)-6-type cytokine signalling and its regulation. *Biochem. J.* 374, 1–20.
- Hepler, J.R., Berman, D.M., Gilman, A.G., and Kozasa, T. (1997). RGS4 and GAIIP are GTPase-activating proteins for Gq alpha and block activation of phospholipase C beta by gamma-thio-GTP-Gq alpha. *Proc. Natl. Acad. Sci. USA* 94, 428–432.
- Hsiao, E.Y., and Patterson, P.H. (2011). Activation of the maternal immune system induces endocrine changes in the placenta via IL-6. *Brain Behav. Immun.* 25, 604–615.
- Hunter, C.A., and Jones, S.A. (2015). IL-6 as a keystone cytokine in health and disease. *Nat. Immunol.* 16, 448–457.
- Huttenlocher, P.R., and Dabholkar, A.S. (1997). Regional differences in synaptogenesis in human cerebral cortex. *J. Comp. Neurol.* 387, 167–178.
- Iidaka, T., Kogata, T., Mano, Y., and Komeda, H. (2019). Thalamocortical Hyperconnectivity and Amygdala-Cortical Hypoconnectivity in Male Patients With Autism Spectrum Disorder. *Front. Psychiatry* 10, 252.
- Jiang, S., Li, C., McRae, G., Lykken, E., Sevilla, J., Liu, S.Q., Wan, Y., and Li, Q.J. (2014). MeCP2 reinforces STAT3 signaling and the generation of effector CD4+ T cells by promoting miR-124-mediated suppression of SOCS5. *Sci. Signal.* 7, ra25.
- Jones, S.A., Horiuchi, S., Topley, N., Yamamoto, N., and Fuller, G.M. (2001). The soluble interleukin 6 receptor: mechanisms of production and implications in disease. *FASEB J.* 15, 43–58.
- Jones, S.A., and Hunter, C.A. (2021). Is IL-6 a key cytokine target for therapy in COVID-19? *Nat. Rev. Immunol.* 21, 337–339.
- Jones, S.A., Scheller, J., and Rose-John, S. (2011). Therapeutic strategies for the clinical blockade of IL-6/gp130 signaling. *J. Clin. Invest.* 121, 3375–3383.
- Jostock, T., Müllberg, J., Ozbek, S., Atreya, R., Blinn, G., Voltz, N., Fischer, M., Neurath, M.F., and Rose-John, S. (2001). Soluble gp130 is the natural inhibitor of soluble interleukin-6 receptor transsignaling responses. *Eur. J. Biochem.* 268, 160–167.
- Kallikourdis, M. (2018). T cell responses to tumor: how dominant assumptions on immune activity led to a neglect of pathological functions, and how evolutionary considerations can help identify testable hypotheses for improving immunotherapy. *Cancer Immunol. Immunother.* 67, 989–998.
- Khan, A., Fomes, O., Stigliani, A., Gheorghie, M., Castro-Mondragon, J.A., van der Lee, R., Bessy, A., Chêneby, J., Kulkarni, S.R., Tan, G., et al. (2018). JASPAR 2018: update of the open-access database of transcription factor binding profiles and its web framework. *Nucleic Acids Res.* 46 (D1), D1284.
- Kim, S., Kim, H., Yim, Y.S., Ha, S., Atarashi, K., Tan, T.G., Longman, R.S., Honda, K., Littman, D.R., Choi, G.B., and Huh, J.R. (2017). Maternal gut bacteria promote neurodevelopmental abnormalities in mouse offspring. *Nature* 549, 528–532.
- Knuesel, I., Chicha, L., Britschgi, M., Schobel, S.A., Bodmer, M., Hellings, J.A., Toovey, S., and Prinssen, E.P. (2014). Maternal immune activation and abnormal brain development across CNS disorders. *Nat. Rev. Neurol.* 10, 643–660.
- Konopaske, G.T., Lange, N., Coyle, J.T., and Benes, F.M. (2014). Prefrontal cortical dendritic spine pathology in schizophrenia and bipolar disorder. *JAMA Psychiatry* 71, 1323–1331.
- Kraakman, M.J., Kammoun, H.L., Allen, T.L., Deswaerte, V., Henstridge, D.C., Estevez, E., Matthews, V.B., Neill, B., White, D.A., Murphy, A.J., et al. (2015). Blocking IL-6 trans-signaling prevents high-fat diet-induced adipose tissue macrophage recruitment but does not improve insulin resistance. *Cell Metab.* 21, 403–416.
- Lee, J., Chung, C., Ha, S., Lee, D., Kim, D.Y., Kim, H., and Kim, E. (2015). Shank3-mutant mice lacking exon 9 show altered excitation/inhibition balance, enhanced rearing, and spatial memory deficit. *Front. Cell. Neurosci.* 9, 94.
- Leibinger, M., Andreadaki, A., Diekmann, H., and Fischer, D. (2013a). Neuronal STAT3 activation is essential for CNTF- and inflammatory stimulation-induced CNS axon regeneration. *Cell Death Dis.* 4, e805.

- Leibinger, M., Müller, A., Gobrecht, P., Diekmann, H., Andreadaki, A., and Fischer, D. (2013b). Interleukin-6 contributes to CNS axon regeneration upon inflammatory stimulation. *Cell Death Dis.* 4, e609.
- Lein, E.S., Hawrylycz, M.J., Ao, N., Ayres, M., Bensinger, A., Bernard, A., Boe, A.F., Boguski, M.S., Brockway, K.S., Byrnes, E.J., et al. (2007). Genome-wide atlas of gene expression in the adult mouse brain. *Nature* 445, 168–176.
- Levitt, P., Ebert, P., Mirnics, K., Nimgaonkar, V.L., and Lewis, D.A. (2006). Making the case for a candidate vulnerability gene in schizophrenia: Convergent evidence for regulator of G-protein signaling 4 (RGS4). *Biol. Psychiatry* 60, 534–537.
- Li, X., Chauhan, A., Sheikh, A.M., Patil, S., Chauhan, V., Li, X.M., Ji, L., Brown, T., and Malik, M. (2009). Elevated immune response in the brain of autistic patients. *J. Neuroimmunol.* 207, 111–116.
- Lim, A.I., McFadden, T., Link, V.M., Han, S.J., Karlsson, R.M., Stacy, A., Farley, T.K., Lima-Junior, D.S., Harrison, O.J., Desai, J.V., et al. (2021). Prenatal maternal infection promotes tissue-specific immunity and inflammation in offspring. *Science* 373, eabf3002.
- Lim, C.P., and Cao, X. (1999). Serine phosphorylation and negative regulation of Stat3 by JNK. *J. Biol. Chem.* 274, 31055–31061.
- Lipina, T.V., Zai, C., Hlousek, D., Roder, J.C., and Wong, A.H. (2013). Maternal immune activation during gestation interacts with Disc1 point mutation to exacerbate schizophrenia-related behaviors in mice. *J. Neurosci.* 33, 7654–7666.
- Lisman, J. (2012). Excitation, inhibition, local oscillations, or large-scale loops: what causes the symptoms of schizophrenia? *Curr. Opin. Neurobiol.* 22, 537–544.
- Liu, H., Bai, H., Hui, E., Yang, L., Evans, C.S., Wang, Z., Kwon, S.E., and Chapman, E.R. (2014). Synaptotagmin 7 functions as a Ca<sup>2+</sup>-sensor for synaptic vesicle replenishment. *Elife* 3, e01524.
- Lodato, S., and Arlotta, P. (2015). Generating neuronal diversity in the mammalian cerebral cortex. *Annu. Rev. Cell Dev. Biol.* 31, 699–720.
- Lodato, S., Molyneaux, B.J., Zuccaro, E., Goff, L.A., Chen, H.H., Yuan, W., Meleski, A., Takahashi, E., Mahony, S., Rinn, J.L., et al. (2014). Gene co-regulation by Fezf2 selects neurotransmitter identity and connectivity of corticospinal neurons. *Nat. Neurosci.* 17, 1046–1054.
- Lu, B., Wang, K.H., and Nose, A. (2009). Molecular mechanisms underlying neural circuit formation. *Curr. Opin. Neurobiol.* 19, 162–167.
- Malkova, N.V., Yu, C.Z., Hsiao, E.Y., Moore, M.J., and Patterson, P.H. (2012). Maternal immune activation yields offspring displaying mouse versions of the three core symptoms of autism. *Brain Behav. Immun.* 26, 607–616.
- Mancinelli, S., and Lodato, S. (2018). Decoding neuronal diversity in the developing cerebral cortex: from single cells to functional networks. *Curr. Opin. Neurobiol.* 53, 146–155.
- Maritano, D., Sugrue, M.L., Tininini, S., Dewilde, S., Strobl, B., Fu, X., Murray-Tait, V., Chiarle, R., and Poli, V. (2004). The STAT3 isoforms alpha and beta have unique and specific functions. *Nat. Immunol.* 5, 401–409.
- Markicevic, M., Fulcher, B.D., Lewis, C., Helmchen, F., Rudin, M., Zerbi, V., and Wenderoth, N. (2020). Cortical Excitation:Inhibition Imbalance Causes Abnormal Brain Network Dynamics as Observed in Neurodevelopmental Disorders. *Cereb. Cortex* 30, 4922–4937.
- Matteoli, M., Verderio, C., Krawzeski, K., Mundigl, O., Coco, S., Fumagalli, G., and De Camilli, P. (1995). Mechanisms of synaptogenesis in hippocampal neurons in primary culture. *J. Physiol. Paris* 89, 51–55.
- Maximov, A., Pang, Z.P., Tervo, D.G., and Südhof, T.C. (2007). Monitoring synaptic transmission in primary neuronal cultures using local extracellular stimulation. *J. Neurosci. Methods* 161, 75–87.
- McAfoose, J., and Baune, B.T. (2009). Evidence for a cytokine model of cognitive function. *Neurosci. Biobehav. Rev.* 33, 355–366.
- McAllister, A.K. (2007). Dynamic aspects of CNS synapse formation. *Annu. Rev. Neurosci.* 30, 425–450.
- Melom, J.E., and Littleton, J.T. (2011). Synapse development in health and disease. *Curr. Opin. Genet. Dev.* 21, 256–261.
- Missault, S., Van den Eynde, K., Vanden Berghe, W., Franssen, E., Weeren, A., Timmermans, J.P., Kumar-Singh, S., and Dedeurwaerdere, S. (2014). The risk for behavioural deficits is determined by the maternal immune response to prenatal immune challenge in a neurodevelopmental model. *Brain Behav. Immun.* 42, 138–146.
- Monje, M.L., Toda, H., and Palmer, T.D. (2003). Inflammatory blockade restores adult hippocampal neurogenesis. *Science* 302, 1760–1765.
- Moore, J.B., and June, C.H. (2020). Cytokine release syndrome in severe COVID-19. *Science* 368, 473–474.
- Munno, D.W., Prince, D.J., and Syed, N.I. (2003). Synapse number and synaptic efficacy are regulated by presynaptic cAMP and protein kinase A. *J. Neurosci.* 23, 4146–4155.
- Munoz-Suano, A., Kallikourdis, M., Sarris, M., and Betz, A.G. (2012). Regulatory T cells protect from autoimmune arthritis during pregnancy. *J. Autoimmun.* 38, J103–J108.
- Murase, S., Kim, E., Lin, L., Hoffman, D.A., and McKay, R.D. (2012). Loss of signal transducer and activator of transcription 3 (STAT3) signaling during elevated activity causes vulnerability in hippocampal neurons. *J. Neurosci.* 32, 15511–15520.
- Nelson, S.B., and Valakh, V. (2015). Excitatory/Inhibitory Balance and Circuit Homeostasis in Autism Spectrum Disorders. *Neuron* 87, 684–698.
- Ni, Y.G., Gold, S.J., Iredale, P.A., Terwilliger, R.Z., Duman, R.S., and Nestler, E.J. (1999). Region-specific regulation of RGS4 (Regulator of G-protein-signaling protein type 4) in brain by stress and glucocorticoids: in vivo and in vitro studies. *J. Neurosci.* 19, 3674–3680.
- Nicolas, C.S., Peineau, S., Amici, M., Csaba, Z., Fafouri, A., Javalet, C., Collett, V.J., Hildebrandt, L., Seaton, G., Choi, S.L., et al. (2012). The Jak/STAT pathway is involved in synaptic plasticity. *Neuron* 73, 374–390.
- Nomoto, S., Adachi, K., Yang, L.X., Hirata, Y., Muraguchi, S., and Kiuchi, K. (1997). Distribution of RGS4 mRNA in mouse brain shown by in situ hybridization. *Biochem. Biophys. Res. Commun.* 241, 281–287.
- O'Donnell, C., Gonçalves, J.T., Portera-Cailliau, C., and Sejnowski, T.J. (2017). Beyond excitation/inhibition imbalance in multidimensional models of neural circuit changes in brain disorders. *eLife* 6, e26724.
- Onore, C., Careaga, M., and Ashwood, P. (2012). The role of immune dysfunction in the pathophysiology of autism. *Brain Behav. Immun.* 26, 383–392.
- Pagani, M., Bertero, A., Liska, A., Galbusera, A., Sabbioni, M., Barsotti, N., Colenbier, N., Marinazzo, D., Scattoni, M.L., Pasqualetti, M., and Gozzi, A. (2019). Deletion of Autism Risk Gene Shank3 Disrupts Prefrontal Connectivity. *J. Neurosci.* 39, 5299–5310.
- Pallaki, P., Georganta, E.M., Serafimidis, I., Papanikolaou, M.P., Papanikolaou, V., Koutloglou, S., Papadimitriou, E., Agalou, A., Tserga, A., Simeonof, A., et al. (2017). A novel regulatory role of RGS4 in STAT5B activation, neurite outgrowth and neuronal differentiation. *Neuropharmacology* 117, 408–421.
- Park, K.W., Nozell, S.E., and Benveniste, E.N. (2012). Protective role of STAT3 in NMDA and glutamate-induced neuronal death: negative regulatory effect of SOCS3. *PLoS ONE* 7, e50874.
- Paspalas, C.D., Selemou, L.D., and Arnsten, A.F. (2009). Mapping the regulator of G protein signaling 4 (RGS4): presynaptic and postsynaptic substrates for neuroregulation in prefrontal cortex. *Cereb. Cortex* 19, 2145–2155.
- Pelkey, K.A., Chittajallu, R., Craig, M.T., Tricoire, L., Wester, J.C., and McBain, C.J. (2017). Hippocampal GABAergic Inhibitory Interneurons. *Physiol. Rev.* 97, 1619–1747.
- Penzes, P., Cahill, M.E., Jones, K.A., VanLeeuwen, J.E., and Woolfrey, K.M. (2011). Dendritic spine pathology in neuropsychiatric disorders. *Nat. Neurosci.* 14, 285–293.
- Pieraut, S., Lucas, O., Sangari, S., Sar, C., Boudes, M., Bouffi, C., Noel, D., and Scamps, F. (2011). An autocrine neuronal interleukin-6 loop mediates chloride accumulation and NKCC1 phosphorylation in axotomized sensory neurons. *J. Neurosci.* 31, 13516–13526.
- Potvin, S., Stip, E., Sepehry, A.A., Gendron, A., Bah, R., and Kouassi, E. (2008). Inflammatory cytokine alterations in schizophrenia: a systematic quantitative review. *Biol. Psychiatry* 63, 801–808.

- Pozzi, D., Lignani, G., Ferrea, E., Contestabile, A., Paonessa, F., D'Alessandro, R., Lippiello, P., Boido, D., Fassio, A., Meldolesi, J., et al. (2013). REST/NRSF-mediated intrinsic homeostasis protects neuronal networks from hyperexcitability. *EMBO J.* 32, 2994–3007.
- Reemst, K., Noctor, S.C., Lucassen, P.J., and Hol, E.M. (2016). The Indispensable Roles of Microglia and Astrocytes during Brain Development. *Front. Hum. Neurosci.* 10, 566.
- Rothaug, M., Becker-Pauly, C., and Rose-John, S. (2016). The role of interleukin-6 signaling in nervous tissue. *Biochim. Biophys. Acta* 1863 (6 Pt A), 1218–1227.
- Rudolph, M.D., Graham, A.M., Feczko, E., Miranda-Dominguez, O., Rasmussen, J.M., Nardos, R., Entringer, S., Wadhwa, P.D., Buss, C., and Fair, D.A. (2018). Maternal IL-6 during pregnancy can be estimated from newborn brain connectivity and predicts future working memory in offspring. *Nat. Neurosci.* 21, 765–772.
- Sala, C., Pièch, V., Wilson, N.R., Passafaro, M., Liu, G., and Sheng, M. (2001). Regulation of dendritic spine morphology and synaptic function by Shank and Homer. *Neuron* 31, 115–130.
- Sandelin, A., Alkema, W., Engström, P., Wasserman, W.W., and Lenhard, B. (2004). JASPAR: an open-access database for eukaryotic transcription factor binding profiles. *Nucleic Acids Res.* 32, D91–D94.
- Sando, R., and Südhof, T.C. (2021). Latrophilin GPCR signaling mediates synapse formation. *eLife* 10, e65717.
- Sawada, M., Itoh, Y., Suzumura, A., and Marunouchi, T. (1993). Expression of cytokine receptors in cultured neuronal and glial cells. *Neurosci. Lett.* 160, 131–134.
- Schumacher, N., Meyer, D., Mauermann, A., von der Heyde, J., Wolf, J., Schwarz, J., Knittler, K., Murphy, G., Michalek, M., Garbers, C., et al. (2015). Shedding of Endogenous Interleukin-6 Receptor (IL-6R) Is Governed by A Disintegrin and Metalloproteinase (ADAM) Proteases while a Full-length IL-6R Isoform Localizes to Circulating Microvesicles. *J. Biol. Chem.* 290, 26059–26071.
- Schust, J., Sperl, B., Hollis, A., Mayer, T.U., and Berg, T. (2006). Stat3: a small-molecule inhibitor of STAT3 activation and dimerization. *Chem. Biol.* 13, 1235–1242.
- Schwarz, E. (2018). A gene-based review of RGS4 as a putative risk gene for psychiatric illness. *American journal of medical genetics. Am. J. Med. Genet. B Neuropsychiatr. Genet.* 177, 267–273.
- Shelly, M., Lim, B.K., Cancedda, L., Heilshorn, S.C., Gao, H., and Poo, M.M. (2010). Local and long-range reciprocal regulation of cAMP and cGMP in axon/dendrite formation. *Science* 327, 547–552.
- Shen, K., and Scheiffele, P. (2010). Genetics and cell biology of building specific synaptic connectivity. *Annu. Rev. Neurosci.* 33, 473–507.
- Shin Yim, Y., Park, A., Berrios, J., Lafourcade, M., Pascual, L.M., Soares, N., Yeon Kim, J., Kim, S., Kim, H., Waisman, A., et al. (2017). Reversing behavioural abnormalities in mice exposed to maternal inflammation. *Nature* 549, 482–487.
- Shirts, B.H., and Nimgaonkar, V. (2004). The genes for schizophrenia: finally a breakthrough? *Curr. Psychiatry Rep.* 6, 303–312.
- Smith, S.E., Li, J., Garbett, K., Mirnics, K., and Patterson, P.H. (2007). Maternal immune activation alters fetal brain development through interleukin-6. *J. Neurosci.* 27, 10695–10702.
- Sohal, V.S., and Rubenstein, J.L.R. (2019). Excitation-inhibition balance as a framework for investigating mechanisms in neuropsychiatric disorders. *Mol. Psychiatry* 24, 1248–1257.
- Spann, M.N., Monk, C., Scheinost, D., and Peterson, B.S. (2018). Maternal Immune Activation During the Third Trimester Is Associated with Neonatal Functional Connectivity of the Salience Network and Fetal to Toddler Behavior. *J. Neurosci.* 38, 2877–2886.
- Supek, F., Bošnjak, M., Škunca, N., and Šmuc, T. (2011). REVIGO summarizes and visualizes long lists of gene ontology terms. *PLoS ONE* 6, e21800.
- Supekar, K., Uddin, L.Q., Khouzam, A., Phillips, J., Gaillard, W.D., Kenworthy, L.E., Yerys, B.E., Vaidya, C.J., and Menon, V. (2013). Brain hyperconnectivity in children with autism and its links to social deficits. *Cell Rep.* 5, 738–747.
- Takeda, K., Noguchi, K., Shi, W., Tanaka, T., Matsumoto, M., Yoshida, N., Kishimoto, T., and Akira, S. (1997). Targeted disruption of the mouse Stat3 gene leads to early embryonic lethality. *Proc. Natl. Acad. Sci. USA* 94, 3801–3804.
- Talkowski, M.E., Seltman, H., Bassett, A.S., Brzustowicz, L.M., Chen, X., Chowdari, K.V., Collier, D.A., Cordeiro, Q., Corvin, A.P., Deshpande, S.N., et al. (2006). Evaluation of a susceptibility gene for schizophrenia: genotype based meta-analysis of RGS4 polymorphisms from thirteen independent samples. *Biol. Psychiatry* 60, 152–162.
- Timper, K., Denson, J.L., Steculorum, S.M., Heilinger, C., Engström-Ruud, L., Wunderlich, C.M., Rose-John, S., Wunderlich, F.T., and Brüning, J.C. (2017). IL-6 Improves Energy and Glucose Homeostasis in Obesity via Enhanced Central IL-6 trans-Signaling. *Cell Rep.* 19, 267–280.
- Tomassy, G.S., Lodato, S., Trayer-Gibson, Z., and Arlotta, P. (2010). Development and regeneration of projection neuron subtypes of the cerebral cortex. *Sci. Prog.* 93, 151–169.
- Urbán, N., and Guillemot, F. (2014). Neurogenesis in the embryonic and adult brain: same regulators, different roles. *Front. Cell. Neurosci.* 8, 396.
- Vallières, L., Campbell, I.L., Gage, F.H., and Sawchenko, P.E. (2002). Reduced hippocampal neurogenesis in adult transgenic mice with chronic astrocytic production of interleukin-6. *J. Neurosci.* 22, 486–492.
- Velazquez-Salinas, L., Verdugo-Rodriguez, A., Rodriguez, L.L., and Borca, M.V. (2019). The Role of Interleukin 6 During Viral Infections. *Front. Microbiol.* 10, 1057.
- Vereyken, E.J., Bajova, H., Chow, S., de Graan, P.N., and Gruol, D.L. (2007). Chronic interleukin-6 alters the level of synaptic proteins in hippocampus in culture and in vivo. *Eur. J. Neurosci.* 25, 3605–3616.
- Wallenius, V., Wallenius, K., Åhrén, B., Rudling, M., Carlsten, H., Dickson, S.L., Ohlsson, C., and Jansson, J.O. (2002). Interleukin-6-deficient mice develop mature-onset obesity. *Nat. Med.* 8, 75–79.
- Wastnedge, E.A.N., Reynolds, R.M., van Boeckel, S.R., Stock, S.J., Denison, F.C., Maybin, J.A., and Critchley, H.O.D. (2021). Pregnancy and COVID-19. *Physiol. Rev.* 101, 303–318.
- Weidler, M., Rether, J., Anke, T., and Erkel, G. (2000). Inhibition of interleukin-6 signaling by galiellalactone. *FEBS Lett.* 484, 1–6.
- Wen, Z., Zhong, Z., and Darnell, J.E., Jr. (1995). Maximal activation of transcription by Stat1 and Stat3 requires both tyrosine and serine phosphorylation. *Cell* 82, 241–250.
- Wierenga, C.J., Walsh, M.F., and Turrigiano, G.G. (2006). Temporal regulation of the expression locus of homeostatic plasticity. *J. Neurophysiol.* 96, 2127–2133.
- Williams, M.E., de Wit, J., and Ghosh, A. (2010). Molecular mechanisms of synaptic specificity in developing neural circuits. *Neuron* 68, 9–18.
- Willis, E.F., MacDonald, K.P.A., Nguyen, Q.H., Garrido, A.L., Gillespie, E.R., Harley, S.B.R., Bartlett, P.F., Schroder, W.A., Yates, A.G., Anthony, D.C., et al. (2020). Repopulating Microglia Promote Brain Repair in an IL-6-Dependent Manner. *Cell* 180, 833–846.e16.
- Xiong, Q., Oviedo, H.V., Trotman, L.C., and Zador, A.M. (2012). PTEN regulation of local and long-range connections in mouse auditory cortex. *J. Neurosci.* 32, 1643–1652.
- York, E.M., LeDue, J.M., Bernier, L.P., and MacVicar, B.A. (2018). 3DMorph Automatic Analysis of Microglial Morphology in Three Dimensions from *Ex Vivo* and *In Vivo* Imaging. *eNeuro* 5, ENEURO.0266-18.2018.
- Yu, G., Wang, L.G., Han, Y., and He, Q.Y. (2012). clusterProfiler: an R package for comparing biological themes among gene clusters. *OMICS* 16, 284–287.
- Yu, H., Pardoll, D., and Jove, R. (2009). STATs in cancer inflammation and immunity: a leading role for STAT3. *Nat. Rev. Cancer* 9, 798–809.
- Zaslavsky, K., Zhang, W.B., McCready, F.P., Rodrigues, D.C., Deneault, E., Loo, C., Zhao, M., Ross, P.J., El Hajjar, J., Romm, A., et al. (2019). SHANK2 mutations associated with autism spectrum disorder cause hyperconnectivity of human neurons. *Nat. Neurosci.* 22, 556–564.
- Zerbi, V., Grandjean, J., Rudin, M., and Wenderoth, N. (2015). Mapping the mouse brain with rs-fMRI: An optimized pipeline for functional network identification. *Neuroimage* 123, 11–21.

- Zerbi, V., Ielacqua, G.D., Markicevic, M., Haberl, M.G., and Ellisman, M.H. (2018). Dysfunctional Autism Risk Genes Cause Circuit-Specific Connectivity Deficits With Distinct Developmental Trajectories. *Cereb. Cortex* 28, 2495–2506.
- Zerbi, V., Jansen, D., Dederen, P.J., Veltien, A., Hamans, B., Liu, Y., Heerschap, A., and Kiliaan, A.J. (2013a). Microvascular cerebral blood volume changes in aging APP(swe)/PS1(dE9) AD mouse model: a voxel-wise approach. *Brain Struct. Funct.* 218, 1085–1098.
- Zerbi, V., Kleinnijenhuis, M., Fang, X., Jansen, D., Veltien, A., Van Asten, J., Timmer, N., Dederen, P.J., Kiliaan, A.J., and Heerschap, A. (2013b). Gray and white matter degeneration revealed by diffusion in an Alzheimer mouse model. *Neurobiol. Aging* 34, 1440–1450.
- Zerbi, V., Markicevic, M., Gasparini, F., Schroeter, A., Rudin, M., and Wenderoth, N. (2019). Inhibiting mGluR5 activity by AFQ056/Mavoglurant rescues circuit-specific functional connectivity in *Fmr1* knockout mice. *Neuroimage* 197, 392–402.
- Zhang, M., Ergin, V., Lin, L., Stork, C., Chen, L., and Zheng, S. (2019a). Axonogenesis Is Coordinated by Neuron-Specific Alternative Splicing Programming and Splicing Regulator PTBP2. *Neuron* 101, 690–706.e10.
- Zhang, Z., Ye, M., Li, Q., You, Y., Yu, H., Ma, Y., Mei, L., Sun, X., Wang, L., Yue, W., et al. (2019b). The Schizophrenia Susceptibility Gene OPCML Regulates Spine Maturation and Cognitive Behaviors through Eph-Cofilin Signaling. *Cell Rep.* 29, 49–61.e7.
- Zheng, X., Boyer, L., Jin, M., Mertens, J., Kim, Y., Ma, L., Ma, L., Hamm, M., Gage, F.H., and Hunter, T. (2016). Metabolic reprogramming during neuronal differentiation from aerobic glycolysis to neuronal oxidative phosphorylation. *eLife* 5, e13374.
- Zhong, S., Ding, W., Sun, L., Lu, Y., Dong, H., Fan, X., Liu, Z., Chen, R., Zhang, S., Ma, Q., et al. (2020). Decoding the development of the human hippocampus. *Nature* 577, 531–536.
- Zhou, F., Yu, T., Du, R., Fan, G., Liu, Y., Liu, Z., Xiang, J., Wang, Y., Song, B., Gu, X., et al. (2020). Clinical course and risk factors for mortality of adult inpatients with COVID-19 in Wuhan, China: a retrospective cohort study. *Lancet* 395, 1054–1062.
- Zhou, Y., Sharma, J., Ke, Q., Landman, R., Yuan, J., Chen, H., Hayden, D.S., Fisher, J.W., 3rd, Jiang, M., Menegas, W., et al. (2019). Atypical behaviour and connectivity in SHANK3-mutant macaques. *Nature* 570, 326–331.
- Zuccaro, E., Murek, V., Kim, K., Chen, H.-H., Mancinelli, S., Oyler-Castrillo, P., Jiménez-Barrón, L.T., Gerhardinger, C., Brown, J.R., Byrnes, A., et al. (2021). Human-specific enrichment of schizophrenia risk-genes in callosal neurons of the developing neocortex. *bioRxiv*. <https://doi.org/10.1101/2021.09.10.459747>.

## STAR★METHODS

### KEY RESOURCES TABLE

| REAGENT or RESOURCE                                                                      | SOURCE                              | IDENTIFIER                      |
|------------------------------------------------------------------------------------------|-------------------------------------|---------------------------------|
| <b>Antibodies</b>                                                                        |                                     |                                 |
| Mouse monoclonal anti-STAT3 (124H6)                                                      | Cell Signaling Technology           | Cat# 9139; RRID AB_331757       |
| Rabbit monoclonal anti- Phospho-Stat3 (Tyr705) (D3A7)                                    | Cell Signaling Technology           | Cat# 9145; RRID AB_2491009      |
| Rabbit monoclonal anti- Phospho-Stat3 (Ser727) Antibody                                  | Cell Signaling Technology           | Cat# 9134; RRID AB_331589       |
| Rabbit polyclonal anti-GAPDH                                                             | Synaptic System                     | Cat# 247-002; RRID AB_10804053  |
| Mouse monoclonal anti-Post Synaptic Density Protein 95 Antibody, clone 6G6-1C9           | Merk-Millipore                      | Cat# MAB1596; RRID AB_2092365   |
| Guinea Pig polyclonal anti- vGlut-1                                                      | Synaptic System                     | Cat# 135-304; RRID AB_887878    |
| Rabbit polyclonal anti- Shank 2                                                          | Synaptic System                     | Cat# 162-202; RRID AB_2619860   |
| Rabbit polyclonal anti- NFκB p65 (C-20)                                                  | Santa Cruz Biotechnology            | Cat# sc-372; RRID AB_632037     |
| Rabbit polyclonal anti- NeuroD2                                                          | Abcam                               | Cat# ab104430; RRID AB_10975628 |
| Rabbit polyclonal anti- Satb2                                                            | Abcam                               | Cat# ab34735; RRID AB_2301417   |
| Mouse monoclonal anti- Glial Fibrillary Acidic Protein (GFAP) antibody                   | Merk-Millipore                      | Cat# G3893; RRID AB_477010      |
| Rabbit polyclonal anti- vGAT                                                             | Synaptic System                     | Cat# 131-003; RRID AB_887869    |
| Guinea Pig polyclonal anti-NeuN                                                          | Synaptic System                     | Cat# 266 004; RRID AB_2619988   |
| rabbit anti-IBA-1                                                                        | FUJIFILM Wako Chemicals U.S.A. Corp | Cat#01919741; RRID AB_839504    |
| Mouse monoclonal anti-βIII Tubulin (Clone 5G8)                                           | Promega                             | Cat# G7121; RRID AB_430874      |
| Rabbit monoclonal anti- Jak2 (D2E12) XP®                                                 | Cell Signaling Technology           | Cat# 3230; RRID AB_2128522      |
| Rabbit polyclonal anti-alphaTubulin                                                      | Sigma Aldrich                       | Cat# T3526; RRID AB_261659      |
| Goat anti-Mouse IgG (H+L) Secondary Antibody, HRP                                        | ThermoFisher                        | Cat# 31430; RRID AB_228307      |
| Goat anti-Rabbit IgG (H+L) Secondary Antibody, HRP                                       | ThermoFisher                        | Cat# 31460; RRID AB_228341      |
| Goat anti-Mouse IgG, IgM (H+L) Highly Cross-Adsorbed Secondary Antibody, Alexa Fluor 488 | ThermoFisher                        | Cat# A-11029; RRID AB_2534088   |
| Goat anti-Rabbit IgG (H+L) Highly Cross-Adsorbed Secondary Antibody, Alexa Fluor 488     | ThermoFisher                        | Cat# A-11034; RRID AB_2576217   |
| Goat anti-Rabbit IgG (H+L) Highly Cross-Adsorbed Secondary Antibody, Alexa Fluor 555     | ThermoFisher                        | Cat# A-21429; RRID AB_2535850   |
| Goat anti-Mouse IgG (H+L) Highly Cross-Adsorbed Secondary Antibody, Alexa Fluor 555      | ThermoFisher                        | Cat# A-21424; RRID AB_141780    |
| Goat anti-Guinea Pig IgG (H+L) Highly Cross-Adsorbed Secondary Antibody, Alexa Fluor 633 | ThermoFisher                        | Cat# A-21105; RRID AB_2535757   |
| <b>Chemicals, peptides, and recombinant proteins</b>                                     |                                     |                                 |
| Recombinant Murine Interleukin 6                                                         | Peprotech                           | Cat# 216-16                     |
| Stattic                                                                                  | Tocris                              | Cat# 2798                       |

(Continued on next page)

| <b>Continued</b>                                                   |                                        |                                                                                                                                                                  |
|--------------------------------------------------------------------|----------------------------------------|------------------------------------------------------------------------------------------------------------------------------------------------------------------|
| REAGENT or RESOURCE                                                | SOURCE                                 | IDENTIFIER                                                                                                                                                       |
| Galiellalactone                                                    | Bioaustralis                           | Cat# BIA-G1032                                                                                                                                                   |
| Polyinosinic:polycytidylic acid (Poly(I:C))                        | Sigma Aldrich                          | Cat# 117M4005V                                                                                                                                                   |
| CCG-63802                                                          | Sigma Aldrich                          | Cat#SML0016                                                                                                                                                      |
| Tetrodotoxin                                                       | Tocris                                 | Cat#1078                                                                                                                                                         |
| Bicuculline                                                        | Tocris                                 | Cat#0109/10                                                                                                                                                      |
| CNQX                                                               | Tocris                                 | Cat# 1045/1                                                                                                                                                      |
| D-AP5                                                              | Tocris                                 | Cat# 0106/1                                                                                                                                                      |
| <b>Critical commercial assays</b>                                  |                                        |                                                                                                                                                                  |
| Signal Lenti STAT3 reporter Kit                                    | QIAGEN                                 | Cat# CLS-6028L                                                                                                                                                   |
| <b>Deposited data</b>                                              |                                        |                                                                                                                                                                  |
| Raw and analyzed scRNA-seq data                                    | This Paper                             | GEO:GSE180345                                                                                                                                                    |
| Raw data from Figures 1,5 and Supplementary Figure 1,2,4,5,6 and 7 | This Paper                             | Mendeley Data <a href="https://doi.org/10.17632/5vpsd5d9zw.1">https://doi.org/10.17632/5vpsd5d9zw.1</a>                                                          |
| <b>Experimental models: Cell lines</b>                             |                                        |                                                                                                                                                                  |
| N2A                                                                | ATCC                                   | Cat# CCL-131; RRID CVCL_0470                                                                                                                                     |
| <b>Experimental models: organisms/strains</b>                      |                                        |                                                                                                                                                                  |
| Mouse C56BL/6N                                                     | Charles River                          | Strain Code 027                                                                                                                                                  |
| Mouse CD1                                                          | Charles River                          | Strain Code 022                                                                                                                                                  |
| <b>Recombinant DNA</b>                                             |                                        |                                                                                                                                                                  |
| pCDNA 3.1 EGFP                                                     | Valeria Poli's lab (Unito, Italy)      | N/A                                                                                                                                                              |
| pCDNA 3.1 myc 768-STAT3 Y795E                                      | Valeria Poli's lab (Unito, Italy)      | N/A                                                                                                                                                              |
| pCDNA 3.1 myc 768-STAT3 Y705F                                      | Valeria Poli's lab (Unito, Italy)      | N/A                                                                                                                                                              |
| pCAG-PSD95.FingR-eGFP-CCR5TC                                       | Addgene                                | Cat#46295; RRID Addgene_4629                                                                                                                                     |
| <b>Software and algorithms</b>                                     |                                        |                                                                                                                                                                  |
| GraphPad Prism 7                                                   | GraphPad Software                      | <a href="https://www.graphpad.com/">https://www.graphpad.com/</a> ;<br>RRID:SCR_002798                                                                           |
| ImageJ                                                             | NIH                                    | <a href="https://imagej.nih.gov/ij/index.html">https://imagej.nih.gov/ij/index.html</a> ;<br>RRID:SCR_003070                                                     |
| Adobe Photoshop CC17                                               | Adobe                                  | <a href="https://www.adobe.com/">https://www.adobe.com/</a> ;<br>RRID:SCR_014199                                                                                 |
| R package edgeR                                                    | N/A                                    | <a href="https://bioconductor.org/packages/release/bioc/html/edgeR.html">https://bioconductor.org/packages/release/bioc/html/edgeR.html</a> ;<br>RRID:SCR_012802 |
| R software (version 3.4.0)                                         | R Foundation for Statistical Computing | <a href="https://www.r-project.org/">https://www.r-project.org/</a>                                                                                              |
| Mini Analysis Program                                              | Synaptosoft Inc.                       | Version 6.0.3                                                                                                                                                    |

## RESOURCE AVAILABILITY

### Lead contact

Further information and requests for resources and reagents should be directed to and will be fulfilled by the lead contact, Davide Pozzi ([davide.pozzi@humanitasresearch.it](mailto:davide.pozzi@humanitasresearch.it)).

### Materials availability

This study did not generate new unique reagents

### Data and code availability

All datasets related to single-cell RNA sequencing have been deposited at GEO and are publicly available as of the date of publication, GEO: GSE180345. Accession numbers are listed in the [Key resources table](#).

This paper does not report original code.

Any additional information required to reanalyze the data reported in this paper is available from the lead contact upon request. Raw data from [Figures 1 and 5](#) and [Figures S1, S2, S4, S5, S6, and S7](#) were deposited on Mendeley Data at <https://doi.org/10.17632/5vpsd5d9zw.1>



## EXPERIMENTAL MODEL AND SUBJECT DETAILS

### Mice

All experiments were performed using mice C57BL/6N (Charles River Laboratories) according to the guidelines established by the European Community Council (Directive 2010/63/EU of September 22nd, 2010) and were approved by the Institutional Animal Care and Use Committee (IACUC, permission number 467 and 565) of the Humanitas Research Hospital and by the Italian Ministry of Health. Mice were housed in a Specific Pathogen Free (SPF) facility under constant temperature ( $22 \pm 1^\circ\text{C}$ ) and humidity (50%) conditions with a 12 h light/dark cycle and were provided with food and water *ad libitum*. Pregnant females aged 3–6 months were used for experiments, and male embryos (E16–E18) and offspring (age P15–P60) were selected for ex-vivo and in-vivo analysis.

### Primary cultures and cell lines

Primary hippocampal neurons were established from E18 C57BL/6 mice as previously described (Pozzi et al., 2013). Briefly, hippocampal regions were isolated from the brain in HBBS 1X (Hank's Balanced Salt Solution) (Life technology), 1% Pen/Strep, 10mM HEPES) and, after trypsinization, they were dissociated and plated onto 24 mm-diameter round glass coverslips, previously coated with 0.1% Poly-L-Lysine (Sigma-Aldrich) in Borate buffer (50 mM Boric Acid, 15 mM Borax) pH 8.5. 80000 cells were seeded onto each coverslip. Cultures were grown in Neurobasal medium supplemented with 2% B27 and 1% Glutamax (Life Technology) at  $37^\circ\text{C}$  and 5%  $\text{CO}_2$ . Neurons were transfected with Lipofectamine 2000 (Life Technology) at 5 days *in vitro* (DIV) according to the manufacturer's protocol, at the same age neurons were infected.

Neuro2a (N2A; ATCC® CCL-131) Neuroblastoma cell line was used to perform FACS experiments. N2A cells were cultured in complete DMEM medium (Life Technology) supplemented with 10% FBS, 1% pen/strep; 1% Ultraglutamine (Life technologies) until reaching the sub-confluence and then seeded in 60mm-diameter round dishes at  $5 \times 10^5$  density.

## METHOD DETAILS

### IL-6 and Poly(I:C) injection in dams

At gestational day 15, pregnant mothers were intraperitoneally (IP) injected with either 5  $\mu\text{g}$  of IL-6, polyinosinic:polycytidylic acid (Poly(I:C)) 2 or 20mg/kg. For the intraventricular injection, laparotomy was performed by injecting 1  $\mu\text{l}$  of IL-6 at 10ng/ $\mu\text{l}$  directly into the embryonic lateral ventricles using the Nanoject II Auto-Nanoliter Injector (Drummond, cat.# 3-000-204). Saline solution was used as a control of injection. Only male embryos and offspring were selected for the ex-vivo and in-vivo analysis.

### In utero electroporation

The pCAG-tdTomato and pCAG-PSD95.FingR-eGFP-CCR5TC (Plasmid #46295) constructs were electroporated *in vivo* as described previously (Lodato et al., 2014). Briefly, 1  $\mu\text{l}$  of purified plasmid DNA (1  $\mu\text{g}/\mu\text{l}$  for pCAG-tdTomato and 0.8  $\mu\text{g}/\mu\text{l}$  for pCAG-PSD95.FingR-eGFP-CCR5TC) were mixed with 0.005% fast green in sterile PBS and was injected in utero into the lateral ventricle of CD1 embryos at E14.5. Five 40-V pulses of 50 ms were delivered at 1 s intervals in an appropriate orientation across the embryonic head using 1-cm-diameter platinum electrodes placed outside the uterus, using a CUY21EDIT square wave electroporator (Nepa Gene). Twenty-four hours after the surgery, pregnant females were injected with 5  $\mu\text{g}$  of IL-6 or vehicle (saline solution). Injected embryos were collected for perfusion and confocal imaging at P21.

### Drugs and Reagents

According to the type of experiment, the following reagents have been used: IL-1 $\beta$ , TNF $\alpha$ , INF $\gamma$ , IL-6 (Peprotech), Poly(I:C) (Sigma-Aldrich), Galiellalactone (BioAustralis), CCG-63802 (Sigma-Aldrich), Stattic, Bicuculline, 6-Cyano-7-nitroquinoxaline-2,3-dione (CNQX), Tetrodotoxin (TTX), D-2-amino-5-phosphonovalerate (APV) (Tocris Bioscience).

### Calcium imaging

Calcium imaging experiments were performed as previously described (Bedogni et al., 2016; Pozzi et al., 2013). Cultured neurons were loaded with the calcium sensitive dye Oregon Green 488 BAPTA 1-AM (Molecular Probes) for 1 h at  $37^\circ\text{C}$  in Neurobasal Medium and then imaged for calcium response. Electrical field stimulation was performed in KRH solution containing in mM: 125 NaCl; 5 KCl; 1,2 MgSO<sub>4</sub>; 1,2 KH<sub>2</sub>PO<sub>4</sub>; 25 HEPES; 6 Glucose; 2 CaCl<sub>2</sub>; pH 7,4. in the presence of CNQX 20  $\mu\text{M}$ , APV 50  $\mu\text{M}$  and Bicuculline 20  $\mu\text{M}$  using a stimulation chamber (Warner Instruments, Hamden, CT). Electrical-evoked calcium transients were induced with a stimulus train of 40 stimuli (duration 1 msec; amplitude 90 mA) at 20Hz as previously reported (Pozzi et al., 2013), using a train generation unit (Digitimer Ltd, DG2A) connected to a stimulus isolation unit (SIU-102; Warner Instruments, Hamden, CT). Recording chambers were placed on the stage of an IX-71 inverted microscope (Olympus, Hamburg, Germany) equipped with an EMCCD (electron-multiplying CCD) camera (Quantem 512x512, Photometrics). Illumination was obtained using a light-emitting diode LED (Cairn research, Optoled Lite), with a 20X objective. Regions of interest (ROIs) of about 15-pixel area were drawn on the cell cytoplasm of virtually all the cells in the recorded field. About 20 cells for each Field Of View (FOV) and 3 FOV for each conditions. Time-lapse recording of calcium dynamics was performed with an acquisition rate of 5 Hz for 600seconds and offline analyzed with MetaFluor software (Molecular

Devices). Calcium responses were measured as  $\Delta F$  ( $F_{max}-F_0$ ) compared to the baseline ( $F_0$ ). All values were normalized to WT neurons at the same developmental stage within the same experiment. Cumulative data were then analyzed through Kolmogorov-Smirnov statistic to verify non-parametric distribution.

## Electrophysiology

### *Ex vivo acute hippocampal slices*

C57BL6 male mice at P15 were deeply anesthetized with isoflurane at 4% by inhalation and decapitated. Brains were removed and placed in ice-cold solution containing the following (in millimolar): 87 NaCl, 21 NaHCO<sub>3</sub>, 1.25 NaH<sub>2</sub>PO<sub>4</sub>, 7 MgCl<sub>2</sub>, 0.5 CaCl<sub>2</sub>, 2.5 KCl, 25 D-glucose, and 7 sucrose, equilibrated with 95% O<sub>2</sub> and 5% CO<sub>2</sub> (pH 7.4). Coronal slices (300  $\mu$ m thick) were cut with a VT1000S vibratome (Leica Microsystems) from medial Prefrontal Cortex (PFC). Slices were incubated at room temperature for at least 1 h, in the same solution as above, before being transferred to the recording chamber. During experiments, slices were superfused at 2.0 mL/min with artificial cerebrospinal fluid (ACSF) containing the following (in millimolar): 135 NaCl, 21 NaHCO<sub>3</sub>, 0.6 CaCl<sub>2</sub>, 3 KCl, 1.25 NaH<sub>2</sub>PO<sub>4</sub>, 1.8 MgSO<sub>4</sub>, and 10 D-glucose, aerated with 95% O<sub>2</sub> and 5% CO<sub>2</sub> (pH 7.4). Cells were examined with a BX51WI upright microscope (Olympus) equipped with a water immersion differential interference contrast (DIC) objective and an infrared (IR) camera (XM10r Olympus). Neurons were voltage (or current) clamped with a Multiclamp 700B patch-clamp amplifier (Molecular Devices, Union City, CA) at room temperature. Low-resistance micropipettes (2–3 M $\Omega$ ) were pulled from borosilicate. The cell capacitance and series resistance were always compensated. Experiments in which series resistance did not remain below 10 M $\Omega$  (typically 5–8 M $\Omega$ ) were discarded. Input resistance was generally close to 100–200 M $\Omega$ . Signals were low-pass filtered at 2 kHz, sampled at 10 kHz and analyzed with Digidata 1440A (Molecular Devices). Recordings were made from cortical layer V pyramidal neurons. Excitatory and inhibitory synaptic basal transmission were recorded at  $-70$  mV and  $+10$  mV respectively in the presence of 1  $\mu$ M TTX, using the following pipette internal solution (in mM): 138 Cs-gluconate, 2 NaCl, 10 HEPES, 4 EGTA, 0.3 Tris-GTP and 4 Mg-ATP (pH 7.2).

### *In vitro primary hippocampal neurons*

Patch-clamp recordings were performed in an extracellular solution with the following composition (in mM): 130 NaCl, 5 KCl, 1.2 KH<sub>2</sub>PO<sub>4</sub>, 1.2 MgSO<sub>4</sub>, 2 CaCl<sub>2</sub>, 25 HEPES, and 6 Glucose, pH 7.4, with glass pipettes of 4–6 M $\Omega$  as recording electrodes. mEPSCs were recorded in the presence of bicucullin (20  $\mu$ M), APV (50  $\mu$ M) and tetrodotoxin (TTX; 1 mM) using the following internal solution (in mM): 135 K-gluconate, 5 KCl, 2 MgCl<sub>2</sub>, 10 HEPES, 1 EGTA, 2 ATP, 0.5 GTP, pH 7.4. mIPSCs were recorded in the presence of 6-cyano-7-nitroquinoxaline-2,3-dione (CNQX; 20  $\mu$ M), (2R)-amino-5-phosphonovaleric acid (APV; 50  $\mu$ M) and TTX (1 mM) using the following internal solution (in mM): 68 K-gluconate, 68 KCl, 2 MgSO<sub>4</sub>, 20 HEPES, 2 ATP, 0.5 GTP, pH 7.2. Both mEPSCs and mIPSCs were recorded at  $-70$  mV as holding potential. Short term plasticity was evaluated through paired whole-cell recording as previously described (Liu et al., 2014; Maximov et al., 2007) using the following internal solution (in mM): 135 K-gluconate, 5 KCl, MgCl<sub>2</sub>, 10 HEPES, 1 EGTA, 2 ATP, 0.5 GTP, and 10 QX-314, pH 7.4. Presynaptic stimulation was achieved through a bipolar electrode (FHC, Concentric bipolar electrode Cat# CBAEC75) placed at 100–150  $\mu$ m from the recorded neuron with 0.9 mA, 1 msec current injection through a stimulus isolation unit (SIU-102; Warner Instruments, Hamden, CT). Electrical signals were amplified by a Multiclamp 200 B (Axon instruments), filtered at 5 kHz, digitized at 20 kHz with a DIGIDATA 1440 and stored with pClamp 10 (Axon instruments). The resting potential was calculated at  $I = 0$  in current clamp configuration, whereas input resistance was calculated in voltage clamp configuration by using the slope of the  $I/V$  relationship of the steady state current measured at different hyperpolarizing voltage steps (from  $-100$  to  $-70$  mV). Only cells with an access resistance  $< 20$  M $\Omega$  were considered for the analysis of mEPSCs and mIPSCs, and  $< 10$  M $\Omega$  for the analysis of short-term plasticity. Access resistance was continuously monitored during the experiment and those cells in which access resistance was changed of more than 10% were rejected. Cells with a leak current above 100 pA were excluded from the analysis. The analysis of both mEPSC and mIPSC were performed with Mini analysis (Synaptosoft Inc., Fort Lee, NJ, USA) whereas the analysis of short-term plasticity was performed with Clampfit (Axon instruments).

## Biochemistry

For total protein extraction, samples were homogenized using the following lysis buffer composed by 1% sodium dodecyl sulfate (SDS), 10mM HEPES at pH 7.4 and 2 mM EGTA and protein concentration was estimated using Bicinchoninic Acid Assay (BCA) kit (Thermo Fischer Scientific) as 20 $\mu$ g. Proteins were loaded with 2x Loading Buffer (100 mM Tris-HCl at pH 6.8; 4% SDS; 20% Glycerol; 200 mM 2-Mercaptoethanol, 2 mg Bromophenol-Blue) and fractionated by SDS-PAGE, then transferred to a nitrocellulose membrane using a transfer apparatus according to the manufacturer's protocols (Bio-Rad). Membranes were stained with the following primary antibodies: mouse anti-STAT3 (Cell Signaling, 1:1000), rabbit anti-STAT3 P-Tyrosine 705 (Cell Signaling, 1:1000), mouse anti-STAT3 P-Serine 727 (Cell Signaling, 1:1000), rabbit anti-GAPDH (Synaptic System, 1:4000), mouse anti-PSD95 (UC Davis/NIH NeuroMab Facility, CA; 1:1000), guinea pig anti-VGLUT1 (Synaptic System, 1:1000), rabbit anti-Shank2/3 (Synaptic System, 1:1000), mouse anti-GAP43 (Millipore, 1:1000), rabbit anti-NFKB (Cell Signaling; 1:1000), rabbit anti-SNAP25 (Synaptic System, 1:1000), mouse anti-p65 (Cell Signaling; 1:1000). Immunodetection was performed with Clarity Western ECL Substrate (Bio Rab) and analyzed through Chemidoc apparatus via ImageLab software (Bio-Rab).

## Immunofluorescence analysis

### *Hippocampal slices*

Mice at P15 and P30 were deeply anesthetized with chloral hydrate (4%; 1 ml/100 g body weight, i.p.) and transcardially perfused with 4% paraformaldehyde (PFA). Post-fixed brains were collected and immunohistochemistry was performed on 50  $\mu$ m hippocampal

coronal sections with specific primary antibodies followed by incubation with the secondary antibodies. The following primary antibodies were used: guinea pig anti-VGLUT1 (1:1500; Synaptic Systems); mouse anti-Vgat (Synaptic Systems, 1:1000), rabbit anti-IBA (WAKO, 1:200), mouse anti-GFAP (Sigma-Aldrich, 1:400), guinea pig anti-NeuN (Synaptic System, 1:500), mouse anti-SATB2 (AbCam, 1:100), rabbit anti-NeuroD2 (AbCam, 1:1500). Embryos' brains (EB) were collected at GD16, 24 hours post mother injection, and post-fixed with PFA 4% for 16 hours. EB were embedded in 4% Low-Melting Agarose and 40  $\mu\text{m}$ -thick slices were cut. Brain slices underwent immunofluorescence staining against mouse anti-STAT3 (Cell Signaling, 1:1000). Secondary antibodies conjugated with Alexa 488, Alexa-555, or Alexa-633 fluorophores (Invitrogen) were used. All slices were counterstained with Hoechst-33342 (Thermo-Fisher) and mounted with Fluorsave (Calbiochem, San Diego, CA, USA). Images were examined by means of a Zeiss LSM800 and Leica Sp8 confocal microscope. *For hippocampal slices analysis*, single plane images were acquired in the stratum radiatum of the CA1 subfield of the hippocampus using 40x oil immersion lens with an additional electronic zoom factor of up to 2. Voxel size is 0.05x0.05 $\mu\text{m}$  and optical slice is 1 $\mu\text{m}$ . VGLUT and Vgat area were calculated as the total area of the positive puncta within a selected Region Of Interest (ROI), normalized to the total area of the ROI. At least four regions were analyzed for each section and three sections were used for each animal. The analyzed regions of one animal were averaged and considered as single data point. *For cortical slices analysis*, multiple plane images were acquired in the first oblique dendrite of somatosensory cortex neurons using the 63x oil immersion lens with an additional electronic zoom factor of 2. Voxel size is 0.09x0.09x0.3 $\mu\text{m}$  and optical slice is 0,9  $\mu\text{m}$ . The parameters of acquisition (laser power, pinhole, gain, offset) were kept constant among groups.

Whole brain images were taken with DMI8 inverted light microscope equipped with ACS APO 10x dry objective (Leica Microsystems, Solms, Germany). Image analyses were performed using Bitplane Imaris 7.4 software (Bitplane AG, Zurich, Switzerland) and Fiji-ImageJ software (NIH, Bethesda, MD, USA).

Hippocampal and cortical microglia morphology was assessed through the semi-automatic method 3DMorph (York et al., 2018), a MATLAB-based software (Mathworks, Natick MA, USA) which enables a three dimensional morphological analysis of skeletonized microglia present in tissue. Images were examined by means of a Leica Sp8 confocal microscope using a 40X oil immersion lens, Voxel size is 0.28x0.28x0.7 $\mu\text{m}$  and optical slice is 1,03  $\mu\text{m}$ . The parameters of acquisition (laser power, pinhole, gain, offset) were kept constant among groups.

#### ***In vitro primary hippocampal neurons***

Neuronal cultures were fixed in 4% PFA, 4% sucrose, 20 mM NaOH and 5 mM MgCl<sub>2</sub> in PBS, pH 7.4, for 8 minutes at room temperature (RT). Cultures were permeabilized and non-specific binding sites of proteins blocked with Goat Serum Dilution Buffer (GSDB; 15% goat serum, 0.3% Triton X-100, 450 mM NaCl, 20 mM phosphate buffer, pH 7.4) for 30 minutes. The following primary antibodies were used: guinea pig anti-VGLUT1 (Synaptic Systems, 1:1000), mouse anti-PSD95 (UC Davis/NIH NeuroMab Facility, CA, 1:800), mouse anti- $\beta$  III Tubulin (Promega Corporation, 1:800), rabbit anti-tubulin (Sigma-Aldrich, 1:80), rabbit anti-MAP2 (Millipore, 1:1000), mouse anti STAT3 (Cell Signaling, 1:1000), GEPHYRIN (Synaptic System, 1:500); VGAT (Synaptic System, 1:500). Secondary antibodies conjugated with Alexa 488, Alexa-555, or Alexa-633 fluorophores (Invitrogen) were used. Roughly 20 images from each experimental condition/ independent experiment (neuronal culture) were analyzed. The operator - blind to the sample treatment - measured the number of pre- and postsynaptic positive juxtaposed puncta formed on one selected segment of the proximal dendrite for each image. The number of dendrites represents the number of neurons analyzed in at least 3-4 independent experiments. The average of all analyzed neurons in each independent experiment was considered for the statistics. Images were acquired using a Leica SP8I confocal microscope equipped with an ACS APO 40x or 63x oil immersion objective.

#### **Nissl staining**

Brains were perfused with 4% PFA and 50  $\mu\text{m}$  thick coronal slices were obtained at the vibratome. Slices were mounted on charged coverslips and let dry overnight. They were then re-hydrated with an alcohol scale from 100% to water and subsequently stained for 5 minutes in a 0.1% cresyl violet solution. Afterward, slices were differentiated again in alcohol 95% for 5 minutes according to the intensity of the staining, de-hydrated in alcohol 100% and a subsequently fixed with a xylene-based medium. Images were taken at BX61VS Olympus microscope using a 10x/0,40 UPlanSApo objective.

#### **Lentiviral infection**

Lentiviral particles ( $> 10^8$  TU/ml) were purchased from Vector Builder (Vector Builder Inc, USA). Lentivirus was designed using the following target sequences: IL6R-shRNA CGAAGCGTTTCACAGCTTAAA; Scrambled-shRNA CCTAAGGTTAAGTCGCCCTCG under U6 promoter. The vector also expresses EGFP under hPGK promoter to visualize transduced cells. Cultured neurons were infected with 7 MOI (multiplicity of infection) of lentiviral particles at 5 DIV and analyzed at 14 DIV.

#### **ELISA**

ELISA assay was performed on extracellular media collected from primary neurons at 7, 14 and 30 DIV and from confluent Raw264.7 cell cultures. Anti-mouse IL-6R $\alpha$  ELISA Kit (R&D cat DY1830) was used according to the manufacturer's protocol.

#### **Magnetic resonance imaging**

N = 16 mice (9 IL-6 and 7 vehicle control) underwent MRI to study the functional connectivity and white matter integrity of the entire brain. During the imaging sessions, the experimenters were blinded to the group. Data collection was performed on a Biospec 70/16 small animal MRI system (Bruker BioSpin) equipped with a cryogenic quadrature surface coil (Bruker BioSpin). For the detection of

rs-fMRI we used a standard echo-echo gradient echo imaging sequence (GE-EPI, repetition time TR = 1 s, echo time TE = 15 ms, resolution in the plane RES =  $0.22 \times 0.2$  mm<sup>2</sup>, number of slices NS = 20, slice thickness ST = 0.4 mm, slice spacing SS = 0.1 mm, 900 volumes, sampling time = 15 min). In addition, diffusion-weighted images (DWI) were used to evaluate the structural integrity of the white matter (EPI spin echo multishot sequence, 4 segments, TR = 2 s, TE = 22 ms, RES =  $0.2 \times 0.2$  mm<sup>2</sup>, NS = 28, ST = 0.4 mm, SS = 0 mm, values b = 0–1000 s / mm<sup>2</sup>, coding 94 directions, acquisition time = 9 min).

During MRI, the degree of anesthesia and the physiological parameters of the mouse were monitored according to a defined protocol to obtain a reliable measure of functional connectivity (Grandjean et al., 2014; Zerbi et al., 2015). Briefly, anesthesia was initiated with 4% isoflurane and the animals were intubated endotracheally and the tail vein was cannulated. The mice were placed on a compatible MRI base and artificially ventilated with 80 breaths / min, 1: 4 O<sub>2</sub> / air ratio and 1.8 mL / h (CWE) flow. A bolus injection of medetomidine 0.04 mg / kg and pancuronium bromide 0.05 mg / kg was given and isoflurane was reduced to 1%. After 5 minutes, an infusion of medetomidine at 0.09 mg / kg / h and pancuronium bromide at 0.15 mg / kg / h were administered and the isoflurane was further reduced to 0.5%. The temperature of the animals was monitored using a rectal thermometer probe and kept in the cradle at  $36.5^{\circ}\text{C} \pm 0.5$  during measurements with a water heating system.

### Resting-state fMRI

The datasets were preprocessed using an existing pipeline to eliminate unwanted time-series confusion, according to the guidelines of the Human Connectome project adapted to the mouse (Zerbi et al., 2015). In short, each rs-fMRI dataset was entered into MELODIC (Multivariate Exploratory Linear Optimized Decomposition of Independent Components; Beckmann and Smith, 2004) to perform an independent component analysis (ICA, number of components set to 60). This included the correction and regression of head movement and in-plane smoothing with a  $0.3 \times 0.3$  mm kernel. We used FSL-FIX for the removal of the variance of artifact components. The artifact-corrected datasets were then band-pass filtered (0.01–0.25 Hz), normalized in a GE-EPI study-specific template, and then to the Allen Common Coordinate Framework Version (CCF, v3) with Advanced Normalization Tools (ANTs v2.1; <http://picsl.upenn.edu/software/ants/>). To further correct for differences in anesthesia dose, functional connectivity data were adjusted taking into account body weight as a covariate.

### Diffusion MRI

For diffusion MRI, the preprocessing steps consisted of individual realignment of the diffusion images, followed by eddy current correction and tensor estimation as in Zerbi et al. (2013a). From the eigenvalues of the diffusion tensor, fractional anisotropy (FA), mean diffusivity (MD), and first eigenvalue ( $\lambda_1$ ) maps were calculated. The resulting volumes were spatially normalized to the Allen CCF template using linear affine and nonlinear elastic transformations in ANTs and thereafter FA, MD, and  $\lambda_1$  values were extracted from seven major white matter structures: anterior commissure, fimbria, corpus callosum, fornix, cingulum, internal capsule, and cerebral peduncle.

### Behavioral analyses

Animals were kept under a light-dark cycle (12 light–12 dark) in a temperature and humidity controlled room. Room lights were low during all procedures. A camera was mounted above the arena and object exploration was tracked using a computer running the Smart Software (Panlab, Harvard Apparatus). Only males were used in these studies.

#### Open Field Analysis

For the open field, each subject was gently placed in the center of the open field and allowed to explore freely all the arena for 10 min. At the end, the animal was removed and the arena cleaned with 70% ethanol and dried before testing the next animal. Locomotor activity was indexed as the distance spent in center, periphery and total distance traveled.

#### Elevated plus maze

The Elevated Plus Maze (EPM) was conducted as previously described (Hagenbuch et al., 2006). Mice were allowed to freely explore the entire apparatus for 5 min. The percentage of time spent in the arms was scored as measure of anxiety-related behavior. The arm entry was defined as having all four paws into the arm of the EPM.

#### Object location Recognition and Novel Object Recognition test

The test was performed in the open-field apparatus. This test was used to assess short-time memory retention. Between trials, the objects and the box were cleaned with 70% ethanol. Mice were first habituated to an open field chamber by allowing free exploration of an empty chamber for 5 min. The Object location and Novel object recognition test included three sessions. In the first session, two identical objects were placed in the testing arena and each mouse was allowed to explore the objects for 10 minutes to facilitate the familiarization. These objects presented similar textures, colors and sizes. One hour later, one of the identical objects was displaced and the mouse was placed back into the chamber and allowed to explore objects for 10 min (Object location Recognition phase). Lastly, 1 hour later, the mouse was returned for 10 min in the chamber where a novel object replaced one of the 2 identical familiar objects (Novel Object Recognition Phase). The amount of time the mouse spent physically investigating each of the objects was manually determined for all the trials and was used to calculate the discrimination index.

### Luciferase assay

To monitor the transcriptional activity of STAT3 cultured neurons were transduced using Signal Lenti STAT3 reporter Kit (QIAGEN) at 3 DIV and exposed to IL-6 and Galactosylactone for 48 hours at 10 DIV. Neurons were then processed according to manufacturer's instructions and Firefly luciferase activity was detected with Luciferase assay system (Promega) and Synergy H2 (Biotek).

### Quantitative RT-PCR

Cultured neurons were homogenized prior to RNA extraction in 500  $\mu$ L of TRI-reagent (Zymo research). Total RNA was isolated using the RNA Direct-Zol MiniPrep Isolation Kit (Zymo research) according to the manufacturer's guidelines. The RNA was eluted in 25  $\mu$ L DNase/RNase-free water, quantified using NANOdrop 2000c spectrophotometer (Thermo Fisher Scientific) for RNA concentration and 260/280 nm optical density ratios. Reverse transcription was performed using 1  $\mu$ g RNA with a High Capacity cDNA RT kit (Applied Biosystems). Quantitative real-time polymerase chain reaction (qRT-PCR) was performed with either Sybr Green detection kit (SensiFAST SYBR Lo-ROX, Bioline) or TaqMan detection kit (TaqMan Fast Universal PCR Master Mix(2x), no AmpErase UNG, ThermoFisher) with RT-PCR Vii7 software system (Applied Biosystems) in a final volume of 10  $\mu$ L. Each gene was subjected to at least duplicate measurements and data analyses were performed with the comparative  $\Delta\Delta C_T$  method. The RNA transcripts were normalized against *gapdh* and *actin3* as indicated. The following Sybr oligos were used: *gapdh* Fw: TTCCAGAGGGGCCATCCACAG, Rv: GGTCACCAGGGCTGCCATTTG; *actin3* Fw: GCCATCCTGCGTTCTGGA, Rv: GCTCTTCTCCAGGGAGGA; *Rgs4* Fw: GTCGGAA TACAGCGAGGAGAAC, Rv: GGAAGGATTGGTCAGGTCAAGATAG; *Stat3* Fw: CCATGCTGAGCATCGAGCAGCTGACA; Rv: TCA CACAGATGAACTTGGTCTTCAGG. The following TaqMan primer were used: NOS2 Mm00440502\_m1; *IL6ra* Mm01211445\_m1; *IL6st* Mm00439665\_m1; *IL6* Mm00446190\_m1; *IL1a* Mm00439620\_m1; *TGFb1* Mm03024053\_m1; *IL10* Mm00439616\_m1; Mouse GAPD(GAPDH) Endogenous Control.

### Fluorescence Activated Cell Sorting (FACS) analysis

The day after plating N2A were co-transfected according to three experimental conditions with the following plasmids: 1) pCDNA 3.1 EGFP; 2) pCDNA 3.1 EGFP + pCDNA 3.1 myc 768-STAT3 Y795E; 3) pCDNA 3.1 EGFP + pCDNA 3.1 myc 768-STAT3 Y705F and maintained for 6 hours in the transfection medium. After 24 hours, they were gently detached with Accutase solution (Sigma-Aldrich) for 3 minutes at 37°C, centrifuged at 500 *rcf.* for 10 minutes and then sorted out by means of BD FACS Melody cell sorter (BD, Biosciences). GFP positive (+) and GFP negative (-) cells were collected for each condition, lysed with TRI-Reagent and subsequently processed for total RNA extraction and qRT-PCR.

### Single cell sequencing

#### Sample preparation

Embryonic hippocampi (Hps) from control embryos or upon IL-6 injection (n = 5 embryos per sample) were rapidly microdissected and pooled together in ice cold dissecting medium (HBSS supplemented with 9,9 mM HEPES pH 7,3) under microscopic control. Dissected Hps were settle down by gravity to aspirate the dissection medium and dissociated to obtain single cell suspension using Papain Dissociation System kit (Worthington, cat#LK003150) following the manufactured instructions. Dissociated Hps were finally centrifuged at 280 g for 5 minutes and resuspended in PBS  $-/-$  with 0.04% BSA (Sigma Aldrich). Next, 10  $\mu$ L of single cells suspension was mixed with 10  $\mu$ L of trypan blue and automatically counted using Countess 3 Automated Cell Counter (Invitrogen, cat#AMQAX2000).

Primary hippocampal neurons untreated and treated with IL-6 (10ng/ml at 1 DIV and 4 DIV) were collected at 5 DIV using Accutase solution (Sigma-Aldrich) and resuspended in 1ml of PBS  $-/-$  with 0.04% BSA (Sigma Aldrich), centrifuged at 450 *rcf.* for 7min and washed twice with PBS  $-/-$  with 0.04% BSA. After the second wash, cells were resuspended in 30  $\mu$ L and counted using Countess 3 Automated Cell Counter (Invitrogen, cat#AMQAX2000).

For both samples,  $\sim$ 5,000 cells were loaded into one channel of the Single Cell Chip A for each sample using the Single Cell 3' v2 single cell reagent kit (10X Genomics) for Gel bead Emulsion generation into the Chromium system. Following capture and lysis, cDNA was synthesized and amplified for 14 cycles following the manufacturer's protocol (10X Genomics). 50 ng of the amplified cDNA were then used for each sample to construct Illumina sequencing libraries. Sequencing was performed on the NextSeq500 Illumina sequencing platform following 10x Genomics instruction for reads generation.

#### Single cell mapping and clustering

Raw sequencing data (bcl-files) were converted to fastq files with Illumina bcl2fastq tool, integrated into the CellRanger (10X Genomics) suite (version 2.1.1). The CellRanger analysis pipeline was used to generate a digital gene expression matrix starting from raw data. Pre-build mouse genome (version mm10-1.2.0) was used as genome reference. CellRanger count module was used to map reads with default settings setting and sequence length set to r1-length = 26 and r2-length = 50. At least 90,000 reads per cell were produced for primary hippocampal neurons and 50,000 reads/cells for the *in vivo* hippocampi. The raw digital gene expression matrix (UMI counts per gene per cell) was imported in R (<https://www.R-project.org/>) version 3.5.2 using Seurat R package (Butler et al., 2018). Briefly, UMI counts per gene per cell for each biological replicate was imported in Seurat. Initial quality control in each biological replicate was assessed, by filtering out cells meeting any of the following criteria: less than 200 or more than 10,000 unique genes expressed, more than 50,000 UMIs, or more than 15.0% of reads mapping to mitochondria (Figure S2C). Data was normalized through a global-scaling method, converted by a scale factor (10,000 by default) and log-transformed. Scaling the data and removing unwanted sources of variation was applied through ScaleData Seurat function. Detection of variable genes across the single cells in each sample was performed. The resulting gene list was used to perform a canonical correlation analysis (CCA) using the first 30 canonical vectors. After aligning subspaces, clustering was performed through FindClusters function, using the first 20 dimensions. Uniform Manifold Approximation and Projection (UMAP) dimensional reduction was computed with RunUMAP function.

For the single cell experiment on embryonic hippocampi, clusters were annotated based on markers available in the literature (Zhong et al., 2020). Marker genes for each cluster were defined with the function FindAllMarkers with parameters min.pct = 0.25 and test.use = wilcox.

For the single cell experiment on primary hippocampal neurons, cluster enrichment was determined by running AddModuleScore Seurat function using top signature genes from the *in vivo* single cell experiment and additional markers from the literature (Cahoy et al., 2008; Cembrowski et al., 2016; Lein et al., 2007).

#### Promoter sequence analysis

The bioinformatic prediction for transcription factor binding sites in RGS4 promoter region was performed using JASPAR database (<http://jaspar.genereg.net/>) (Khan et al., 2018; Sandelin et al., 2004)

#### Single cell markers identification and differential expression

We identified markers specific to each cluster using FindAllMarkers Seurat function with the following settings (only.pos = TRUE, min.pct = 0.05 or 0.20, thresh.use = 0.05 or 0.10 respectively for *in vitro* and *in vivo* experiments). To identify differentially expressed genes within the same cluster in different experimental conditions and between different clusters in the same experimental condition, we used MAST (Finak et al., 2015) or Wilcoxon algorithms implemented in Seurat FindMarkers function with an FDR cut-off of 0.05 and a logfc.threshold = 0.10 (*in vivo*) or 0.2 (*in vitro*). Gene ontology analysis of biological processes (BP) enrichment was performed with clusterProfiler R package (Yu et al., 2012) and summarized with Revigo web server (Supek et al., 2011) to remove redundant GO:BP terms.

#### QUANTIFICATION AND STATISTICAL ANALYSIS

The numerical data shown in the figures are presented as means  $\pm$  SEM. The normal distribution of experimental data was assessed using Kolmogorov Smirnov and Shapiro-Wilk normality tests. If not specifically indicated, to compare two normally distributed sample groups, the Student's unpaired two-tailed t test was used. To compare two sample groups that were not normally distributed, we used Mann-Whitney's non-parametric test. To compare more than two normally distributed sample groups, we used one ANOVA, followed by Tukey's multiple comparisons test. To compare more than two groups that were not normally distributed, we used one One-way ANOVA on ranks followed by Dunn's multiple comparison test. One sample t test or Wilcoxon Signed Rank Test were used in some experiments to analyze normally distributed or not normally distributed dataset, respectively. Statistical analysis was performed by using SigmaPlot (Systat), GraphPad (Prism) or OriginPro (OriginLab) software.

**Supplemental information**

**Prenatal interleukin 6 elevation increases  
glutamatergic synapse density and disrupts  
hippocampal connectivity in offspring**

**Filippo Mirabella, Genni Desiato, Sara Mancinelli, Giuliana Fossati, Marco Rasile, Raffaella Morini, Marija Markicevic, Christina Grimm, Clara Amegandjin, Alberto Termanini, Clelia Peano, Paolo Kunderfranco, Graziella di Cristo, Valerio Zerbi, Elisabetta Menna, Simona Lodato, Michela Matteoli, and Davide Pozzi**

## SUPPLEMENTARY FIGURE LEGENDS

**Figure S1 refers to Figure 1: Transient prenatal elevation of IL-6 disrupts normal brain network connectivity within specific large-scale circuits and alters spatial memory.**

(A) Representative scheme showing the experimental procedure used for the in vivo approach: a single pulse of either vehicle (saline, as control) or IL-6 (5 $\mu$ g) was intraperitoneally injected in pregnant mothers at gestational day 15 and the male offspring were analyzed at different post-natal day with different experimental techniques.

(B) Immunofluorescence analysis of VGLUT1 and VGAT positive puncta in CA1 hippocampal neurons at P30 in the two conditions. Scale Bar 10 $\mu$ m.

(C) Quantitative analysis of VGLUT1 and VGAT area (vehicle n=7 male mice; IL-6 n=6 male mice.; Three independent experiments, Mann-Whitney test, \*\*p=0,0047).

(D) (Upper panel) Scheme of the experimental set-up for MRI recordings. Adult male offspring from mothers exposed to IL-6 or Vehicle at GD15 underwent a single MRI session to record resting-state fMRI and diffusion tensor imaging, under light anesthesia (isoflurane 0.5% + medetomidine 0.1 mg/kg/h). (Lower Panel) Circos-plot showing the anatomical location of hypo-connected edges (n=36) in IL-6 mice compared to vehicle-treated mice (p<0.05, uncorrected).

(E) Dual-regression analysis in 15 resting-state networks (RSNs) revealed a significant increase only in the Dorsal Hippocampal network strength in the IL-6 group compared to vehicle mice. Multivariate ANOVA, Bonferroni corrected across 15 RSNs.

(F) Fractional anisotropy (FA) was assessed by diffusion tensor imaging and quantified in nine large white matter structures. None of these structures show significant microstructural differences between IL-6 and vehicle-treated mice. Multivariate ANOVA, Bonferroni corrected across 9 structures.

(G-H) Discrimination *index* values in novel object location (G) and in novel object recognition (H). Vehicle n=10 male mice, IL-6 n=14 male mice from 2 independent mothers. \*p=0,043 Unpaired t test with Welch's correction.

(I) Elevated plus maze: quantification of the percentage of time spent in the closed and open arms of plus maze arena.

(J) Open field: Quantification of distance travelled separately in the center and periphery, and total distance (cm) in an open field arena. Two-way Anova with Sidak's multiple comparison Post hoc test. Vehicle n=13 male mice, IL-6 n=7 male mice, from three independent mothers.



**Figure S2 refers to Figure 1: Transient prenatal elevation of IL-6 does not alter the gross anatomy and the glial composition of the brain in offspring**

(A). Nissl staining of three independent P15 brain coronal sections, at different rostro-caudal levels, derived from mice prenatally exposed to Vehicle- or IL-6 via maternal intraperitoneal injection. Scale bar 500  $\mu\text{m}$ . Ctx: Cortex, Str: Striatum, Hp: Hippocampus. LV: Later Ventricle. No gross anatomical malformations are present.

(B). Representative image of P30 coronal brain sections stained for Satb2 (green), NeuroD2 (red), NeuN (grey) Hoechst (blue), obtained from mice prenatally exposed to either Vehicle or IL-6. Scale bar 1000  $\mu\text{m}$ . Relative image of the selected (dashed rectangle) area of the somatosensory cortex showed below. Scale bar 500  $\mu\text{m}$ . Right panel: quantitative analysis of SATB2 intensity (Vehicle n= 4 mice, IL-6 n= 4 mice. Two independent experiments).

(C) Immunofluorescence analysis of coronal brain section at P15 in CA1 hippocampal region, obtained from mice prenatally exposed to vehicle- or IL-6 via maternal intraperitoneal injection, stained with Hoechst (blue), GFAP (red), and NeuN (White). Scale bar 50  $\mu\text{m}$ .

(D) Quantitative analysis of astrocyte properties (left panels) including GFAP mean intensity and astrocyte density (Vehicle n=6 mice, IL-6 n=6 mice. Two independent experiments).

(E) Immunofluorescence analysis of coronal brain section at P15 in CA1 hippocampal and (F) cortical region, obtained from mice prenatally exposed to Vehicle- or IL-6 via maternal intraperitoneal injection stained with Iba1 (green), NeuN (white) and Hoechst (blue).

(G-H) Quantitative analysis of microglia morphological features (ramification, Cell territory, number of branching, branch length), intensity of Iba1 and microglia density in both hippocampus (G) and cortex (H) of mice prenatally exposed to IL-6 or vehicle. (Vehicle n=6 mice, IL-6 n=6 mice. Two independent experiments).

(I-J) gene expression analysis through qPCR of a panel of inflammation-derive molecules performed in hippocampus (I) and cortex (J) of mice prenatally exposed to IL-6 or vehicle (Vehicle n=16 mice, IL-6 n=18 mice. Three independent experiments).

**Figure S3 refers to Figure 2. Single cell sequencing in hippocampi at E16 exposed to IL-6 at E15**

(A) UMAP colored by sample type and cell types divided by treatment.

(B) Histogram plot showing the cell type proportion in the two experimental groups.

(C) Violin Plots showing QC parameters used in the analysis pipeline: nCount\_RNA, raw read count per cells; nFature\_RNA, number of gene per cell; MTPCY; percent of mitochondrial genes per cell.

(D) Venn diagram showing the degree of overlaps between cell types of differentially expressed genes upon IL-6 treatment.

(E) Volcano plot showing DEGs in DE-EXN cell type.

(F) Bar plot showing enriched gene ontology in DE-ExN DEGs.

**Figure S4 refers to Figure 3: Chronic IL-6 treatment in cultured neurons does not increase GABAergic synapses and does not alter neither presynaptic release probability nor electrically evoked neuronal calcium transients.**

(A) (Left panel) Quantitative analysis of resting potential measured in current clamp configuration ( $I=0$ ) in untreated and chronically treated neurons with IL-6 10 ng/ml. (Right panel) Quantitative analysis of membrane resistance measured in voltage clamp configuration in untreated and chronically treated neurons with IL-6 10 ng/ml (Resting Potential: Ctrl n=26 cells, IL-6 n=23 cells. Input Resistance: Ctrl n= 33 cells, IL-6 n= 31 cells. Three independent experiments).

(B) Immunofluorescence analysis of cultured hippocampal neurons at 14 DIV stained with  $\beta$ 3Tubulin (green), Gephyrin (red), VGAT (white) in control condition or upon IL-6 treatment.

(C) Quantification of Gephyrin and VGAT colocalizing puncta per 10  $\mu$ m length of  $\beta$ 3Tubulin in both conditions. (Ctrl n=102, IL-6 n= 112. Four independent experiments).

(D) Representative electrophysiological traces of excitatory post-synaptic currents (EPSC) evoked by paired pulse at 50 msec both in control condition and upon IL-6 chronic treatment at 10 ng/ml.

(E) Short term plasticity measured as paired pulse ratio (PPR) between first and second EPSC evoked at different interpulse intervals. (Ctrl n=15 cells, IL-6 n=15 cells. Three independent experiments).

(F) Quantitative analysis of a single electrically evoked EPSC recorded in the two conditions. (Ctrl n=42 cells, IL-6 n= 42 cells. Three independent experiments, Mann-Whitney test. \* $p<0,0138$ ).

(G) Upper panels: Pseudocolor images of cultured neurons in control condition loaded with calcium sensitive dye Oregon-Green and imaged (505 nm) in resting state (left panel) and upon an electrical field stimulation (90 mA for 2 sec @ 20Hz, right panel) in the present of synaptic transmission blockers (scale bar 50  $\mu$ m). Lower panels: temporal analysis of intracellular calcium changes measured at somato-dendritic level during electrical stimulation in control (left) and IL6 (right) treated neurons.

(H) Quantitative analyses of intracellular calcium influx in control condition and upon chronic IL-6 10 ng/ml treatment. (number of analyzed cells: Ctrl n=184, IL-6 n=212. Three independent experiments).

(I) Immunofluorescence analysis of mature cultured neurons at 14 DIV stained with GFAP (red) NeuN (white) and Hoechst (blue) grown in control condition and upon increasing doses of Ara-C (1-4  $\mu$ M), scale bar 100  $\mu$ m.

(J) Quantitative analysis of the percentage of astrocytes (identified as GFAP-positive cells) and neurons (identified as NeuN-positive cells) in control cultured neurons and upon different concentrations of Ara-C at 14 DIV (Ctrl n= 24, Ara-C 1  $\mu$ M n=23, Ara-C 2 $\mu$ M n=21, Ara-C 3 $\mu$ M n=21, Ara-C 4 $\mu$ M n=21. Two independent experiments. Kruskal-Wallis test followed by Dunn's multiple comparisons test. Neurons: Ara-C 1 $\mu$ M \*\*\*p=0,00039, Ara-C 2 $\mu$ M \*\*\*\*p=1,58x10<sup>-6</sup>, Ara-C 3 $\mu$ M \*\*\*\*p=1,71x10<sup>-10</sup>, Ara-C 4 $\mu$ M p<0,8x10<sup>-14</sup>; Astrocytes: Ara-C 1 $\mu$ M \*\*\*\*p=1,46x10<sup>-5</sup>, Ara-C 2 $\mu$ M \*\*\*\*p=5,19x10<sup>-6</sup>, Ara-C 3 $\mu$ M \*\*\*\*p=6,59x10<sup>-10</sup>, Ara-C 4 $\mu$ M \*\*\*\*p=3,6x10<sup>-14</sup>).

(K) Quantitative analysis of the percentage of astrocytes (identified as GFAP-positive cells) and neurons (identified as NeuN-positive cells) in control cultured neurons at 1 and 7 DIV, and upon different concentrations of Ara-C (1 DIV n= 15, 7 DIV n=29, Ara-C 1  $\mu$ M n=11, Arac-C 2 $\mu$ M n=11, Ara-C 3 $\mu$ M n=11, Ara-C 4 $\mu$ M n=12. One experiment. Kruskal-Wallis test followed by Dunn's multiple comparisons test. Neurons: 7DIV \*\*\*\* p=1,27x10<sup>-10</sup>, Ara-C 1  $\mu$ M\* p=0,013, Ara-C 2  $\mu$ M \*\* p=0,0088, Ara-C 3  $\mu$ M \*\*\*\* p=7,81x10<sup>-8</sup> , Ara-C 4  $\mu$ M \*\*\*\*p= 9,40x10<sup>-9</sup>; Astrocytes: 7DIV \*\*\*\* p=3,58x10<sup>-10</sup>, Ara-C 1  $\mu$ M\* p=0,027, Ara-C 2  $\mu$ M \*\* p=0,0069 , Ara-C 3  $\mu$ M \*\*\*\* p=8,2x10<sup>-9</sup> , Ara-C 4  $\mu$ M \*\*\*\*p=5,37x10<sup>-10</sup>).

(L) Representative electrophysiological traces of mEPSC in Ara-C treated cultures both in control condition and upon the chronic treatment with IL-6 10 ng/ml. (Lower panel) Quantitative analysis of amplitude and frequency of mEPSC in Ara-C treated neurons in both control and IL-6 treated neurons. (Ctrl n= 24, IL-6 n= 30. Three independent experiments. Mann-Whitney test. \*\*\*p=0,0002; \*p=0,0452).

(M) Immunofluorescence analysis of cultured neurons untreated and chronically treated with IL-6 10ng/ml, stained with antibodies against specific neuronal (NeuN, green) glial (GFAP, red) and a general cellular marker (Hoechst, blue). Scale Bar 100 $\mu$ m. (Lower panel, left). Quantification of the total number of cells identified through Hoechst staining. (Ctrl n=32 coverslips, IL-6 n=31 coverslips. Roughly 3-4 field analyzed for each coverslip. Three independent experiments. Mann-Whitney test). (Lower panel, right) Ratio in percentage of GFAP positive (astrocytes) to the NeuN positive (neurons) cells in the two conditions (Three independent experiments. Mann-Whitney test).

(N) Representative immunofluorescence images of cultured hippocampal neurons at 7 DIV stained with MAP2 (green), Iba1 (red) and NeuN (white) in control condition and cocultured with microglia cells. Scale bar 100  $\mu$ m.

**Figure S5 refers to Figure 4-5. IL-6 does not affect glutamatergic transmission at later stages of neuronal development and classical signaling is the predominant mechanism of IL-6 action in developing neurons.**

(A) Schematic diagram of the experimental procedure. Cultured cortical neurons were incubated with IL-6 10ng/ml at 1 and 4 DIV and (after a washout at 7 DIV) glutamatergic synaptic basal transmission was then assessed at 14 DIV. Right graphs: Quantification of mEPSCs frequency and amplitude in cortical neurons at 14 DIV. (Ctrl n=14, IL-6 n=15. Three independent experiments. \*p= 0,0137 Mann-Whitney test).

(B) Schematic diagram of the experimental procedure. Cultured neurons were incubated with 10ng/ml IL-6 for 7 days, from 1 to 7 DIV (Upper scheme) or from 14 to 20 DIV (lower scheme) (adding IL-6 every 2 days) and then assessed for excitatory basal transmission through patch-clamp recording at 21 DIV. (Right panels) Quantification of mEPSCs frequency and amplitude in the indicated conditions. (Ctrl n= 35, IL-6<sub>1-7DIV</sub> n=28, IL-6<sub>14-20DIV</sub> n=30. Four independent experiments. Kruskal-Wallis test followed by Dunn's multiple comparisons test. \*\*\*p=0,0010, \*\*p=0,0013).

(C) Representative traces of mEPSCs obtained from cultured hippocampal neurons at 14 DIV acutely perfused with vehicle for 1 minutes and with IL-6 10ng/ml for at least 5 minutes (here shown only 1 minutes). Lower graphs: quantification of frequency and amplitude of mEPSCs before and after the application of IL-6. (n=7 cells. Wilcoxon paired test).

(D) Schematic diagram of the experimental procedure. Cultured hippocampal neurons established from E18 or E15 embryonic brain were incubated with IL-6 10ng/ml at 1 and 4 DIV and glutamatergic synaptic basal transmission was then assessed at 14 DIV. Right graphs show the average mEPSCs frequency and amplitude in the two conditions. (Ctrl E15 n=8, IL-6 n=6, \*\*p=0,004 Mann-Whitney test; Ctrl E18 n= 6, IL-6 E18 n=7, \*\*p=0,0082 Mann-Whitney test, One independent experiment).

(E) Representative immunofluorescence images of cultured neurons at 7 DIV established from E18 and E15 and stained with GFAP (red), Map2 (green) and NeuN (white) and (F right panel) the relative quantification of the percentage of neurons (identified as NeuN-positive cells) and (F left panel) astrocytes (identified as GFAP-positive cells). E15 n=17, E18 n=17, astrocytes \*\*\*\*p=2,3 x10<sup>-7</sup>, neurons \*\*\*\* p=2,3 x10<sup>-7</sup>, Mann-Whitney test, one independent experiment).

(G) (Upper panel) Representative electrophysiological traces of mEPSCs recorded in cultured neurons at 14 DIV in control condition and upon a single application of distinct proinflammatory cytokines at 1 DIV (INF $\gamma$  25 ng/ml , TNF $\alpha$  10 ng/ml , IL1 $\beta$  40 ng/ml). (Lower panel) Quantification of mEPSCs frequency and amplitude in the indicated conditions. (ctrl n= 16 cells, INF $\gamma$  n=14 cells, TNF $\alpha$  n=10, IL1 $\beta$  n=12 cells. Three independent experiments. One-way ANOVA on ranks followed by Dunn's multiple comparison test).

(H) Western blot analysis of STAT3 phosphorylation (left panel) in cortical tissue collected from embryos intraventricularly injected with either Vehicle or IL-6 for 3 hours. Quantification of the optical density of STAT3 phosphorylation in tyrosine 705 normalized versus STAT3 total protein amount. (Three independent experiments, Vehicle IV: n= 10 embryos. IL-6 IV n=11 embryos. \*\*p=0,003. Unpaired T-test).

(I) Transcriptional expression of IL6R and gp130 in cultured neurons at 6 DIV in control condition and upon IL-6 application at 1 and 4 DIV. (five independent experiments. One sample t-test. \*p= 0,0107).

(J) Western blot analysis of STAT3 phosphorylation in cultured neurons infected with lentivirus expressing scrambled shRNA or specific IL-6R shRNA, in control conditions and upon acute treatment (30 minutes) with IL-6 10 ng/ml.

(K) Time course transcriptional analysis of IL6R and gp130 in Ara-C-treated hippocampal neurons at 5, 10 and 15 DIV through qPCR (IL6R: five independent experiments, \*p=0,0098; gp130: seven independent experiments, \*\*p=0,0070. One sample t-test).

(L) Time course transcriptional analysis of IL6R (left panel) and gp130 (right panel) in hippocampi of embryos at different prenatal developmental stages (E16: n =3 from three litters; E18: n =3 from one litter, E19 n=3 from one litter, P0 n=3 from two litters. IL-6R: \*p=0,039, Kruskal-Wallis followed by Dunn's multiple comparison test; gp130: \*p=0,044. One way ANOVA One way ANOVA with Holm-Sidak's multiple comparison test).

(M) Time course transcriptional analysis of IL6R (left panel) and gp130 (right panel) in cortex of embryos at different prenatal developmental stages (E16: n =3 from three litters; E18: n =3 from one litter, E19 n=3 from one litter, P0 n=3 from two litters. IL-6R: \*p=0,047. One way ANOVA with Holm-Sidak's multiple comparison test).

(N) Western blot analysis of STAT3 phosphorylation in cultured neuron at 7 DIV acutely treated (30 minutes) with IL-6 10ng/ml in the absence and presence of increasing concentrations of sgp130 (1,5 and 10 µg/ml).

(O) Western blot analysis of STAT3 phosphorylation in macrophage cell lines RAW 264.7 acutely treated (30 minutes) with IL-6 10ng/ml in the absence and presence of sgp130 at 10 µg/ml.

(P) ELISA quantification of soluble IL-6R in supernatants of Raw 264.7 and hippocampal cultures, collected at indicated timepoints. (Raw 264.7 n=2, 7 DIV n=3, 14 DIV n=3, 30 DIV n=2).

**Figure S6 refers to Figure 4-6: Role of different pro-inflammatory cytokines in glutamatergic synaptogenesis. Effect of Statitic dosage on neuronal death and glutamatergic synaptic transmission in developing cultures. The increase of STAT3 protein expression level is transient and is not due to STAT3 phosphorylation itself.**

- (A) Schematic representation of the experimental procedure used in Figure 6 C,D
- (B) Neuronal death assay performed in neuronal cultures incubated at 1 DIV with different concentrations of Stattic (0; 0,5; 1; 2; 4  $\mu$ M) using Calcein (live cells, green), Propidium Iodide (death cells, red) and *Hoechst* (total cells, in blue) in vivo staining. Scale bar 100  $\mu$ m. (Lower panel) The percentage of dead (PI positive cells) and (Right panel) live cells (calcein positive cells) were evaluated as percentage of the total number of cells (*Hoechst positive cells*) (n= 9-15 coverslips analyzed for each condition. Roughly 100 cells analyzed for each coverslip. Three independent experiments. Kruskal-Wallis test. Calcein: \*\*p=0,0059, \*\*\*\*p=5,5 x 10<sup>-6</sup>; PI: \*\*p=0,0019; \*\*\*\*p=3,2x10<sup>-6</sup>).
- (C) Representative traces of mEPSCs recorded in cultured neurons at 14 DIV in control condition and upon a single incubation of Stattic 1 $\mu$ M at 1 DIV. (Lower panel) Quantitative analysis of mEPSCs frequency and amplitude in the two conditions. (Ctrl n= 22 cells, IL-6 n=18 cells. Three independent experiments. Mann Whitney test).
- (D) Scheme of *the* experimental procedure. IL-6 was chronically applied throughout the in vitro development of hippocampal neurons, from 1 DIV up to 13 DIV, by adding the cytokine with either Vehicle or Stattic 1  $\mu$ M every 3 days.
- (E) Representative traces of mEPSCs recorded in neuronal cultures at 14 DIV in the indicated conditions.
- (F) Quantitative analysis of mEPSCs frequency and amplitude in the indicated conditions. (Ctrl n=22 cells, IL-6 n=26 cells, IL-6 Stattic n=31 cells. Four Independent experiments. One-way ANOVA on ranks followed by Dunn's multiple comparison test. Ctrl vs IL6 \*\*\*p=0,0004; IL-6 vs IL-6 Stattic\*\*\*p=0,0002).
- (G) Upper panel: western blot analysis of STAT3 protein expression in cultured neurons at 14 DIV chronically treated with IL-6 together with either Vehicle or Stattic 1  $\mu$ M every 3 days (refer to scheme in D). Lower panel: quantification of the optical density of total amount of STAT3 protein in the different conditions normalized by the total amount of GAPDH protein (Three independent experiments, One sample t test \*p<0,05).
- (H) Western blot analysis of a panel of synaptic and non-synaptic proteins (left panel) evaluated in cultured neurons at 14 DIV in control condition and upon chronic treatment of IL-6 with the relative quantitative analysis (right) normalized by the total amount of GAPDH protein level. (Four independent experiment, One simple t test. \*p<0,05).
- (I) Schematic representation of the experimental procedure (Upper panel). IL-6 10ng/ml was incubated at 1 and 4 DIV (similar to scheme in Figure 4A), cultured neurons were then collected at 14 DIV and STAT3 expression was analyzed through western blot analysis (Right panel). STAT3 protein expression was normalized by total GAPDH protein. (Three independent experiments, Mann Whitney test).

**Figure S7 refers to Figure 6. Dose-effect relationship of Galiellalactone and CCG-063802 on neuronal death in cultured neurons. Cluster identification methodology and predictive analysis of Rgs4 promoter region.**

(A) Neuronal death assay performed in cultured neurons incubated with different concentrations of Galiellalactone (0; 2; 4; 8; 16  $\mu$ M) at 1 DIV using Calcein (green), Propidium Iodide (red) and *Hoechst* (blue) in vivo staining. Scale bar 100  $\mu$ m. (Right panel) the percentage of dead (PI positive cells, left panel) and live cells (calcein positive cells, right panel) were evaluated as percentage of the total number of cells (*Hoechst positive cells*) (n= 10-12 coverslips analyzed for each condition. Roughly 100 cells analyzed for each coverslip. Three independent experiments.). One-way ANOVA on ranks followed by Dunn's multiple comparison test. PI: \*\*\*\*p=0,00007; Calcein: \*\*\*\*p=0,00007.

(B). Western blot analysis STAT3 Phosphorylation at Tyrosine 705 in control condition and upon acute stimulation (30 min) of IL-6 in the presence of either Vehicle or Galiellalactone at 1 and 4  $\mu$ M.

(C) Representative traces (left panel) of mEPSCs recorded in cultured neurons at 14 DIV treated with Galiellalactone 4  $\mu$ M, at 1 DIV, and (right panel) the relative quantitative analysis (Ctrl n= 13 cells, Gall4 n= 15 cells. Three independent experiments. Mann Whitney test)

(D) Experimental workflow used for Figure 6J-K: cultured neurons were incubated with IL-6 for a short period (1 and 4 DIV) together with either vehicle or Galiellalactone and analyzed through patch-clamp recording at 14 DIV

(E) Experimental workflow used for single cell sequencing: cultured neurons were treated with IL-6 at 1 and 4 DIV, and subsequently dissociated at 6 DIV for the analysis.

(F) Feature violin plots showing gene modules score analysis for different cell types: CA-ExN; CA-Excitatory Neurons; CA-CR, CA-Cajal Raetzius; DG-ExN; DG- Excitatory neurons; InhN, Inhibitory Neurons; Astro, Astrocytes.

(G) Predicted Stat3 response element in the promoter of Rgs4, together with score and position. JASPAR<sup>2018</sup> scan tool was used to assess enrichment. Only hits with a relative profile score threshold above 80% was considered significant.

(H) Experimental workflow used in Figure 7K-L: cultured neurons was incubated with IL-6 in the presence or absence of CCG-063802.

(I) Neuronal death assay performed in neuronal cultures incubated with different concentrations of CCG-063802 (0; 1,25; 2,5; 5; 7,5; 15  $\mu$ M) a 1 DIV using Calcein (green), Propidium Iodide (red) and *Hoechst* (blue) in vivo staining. Scale bar 100  $\mu$ m. (Right panel) The percentage of dead (PI positive cells, left panel) and live cells (calcein positive cells, right panel) were evaluated as percentage of the total number of cells (*Hoechst*

*positive cells*) (n= 9-18 coverslips analyzed for each condition. Roughly 100 cells analyzed for each coverslip. Three independent experiments.). One-way ANOVA on ranks followed by Dunn's multiple comparison test. PI: \*\*p=0,0048, 7.5μM \*\*\*\*p=6,67x10<sup>-5</sup>, 15μM \*\*\*\*p=9,84 x10<sup>-9</sup>; Calcein: \*\*p=0,0048, 7.5μM \*\*\*\*p=6,67x10<sup>-5</sup>, 15μM \*\*\*\*p=9,84 x10<sup>-9</sup>).



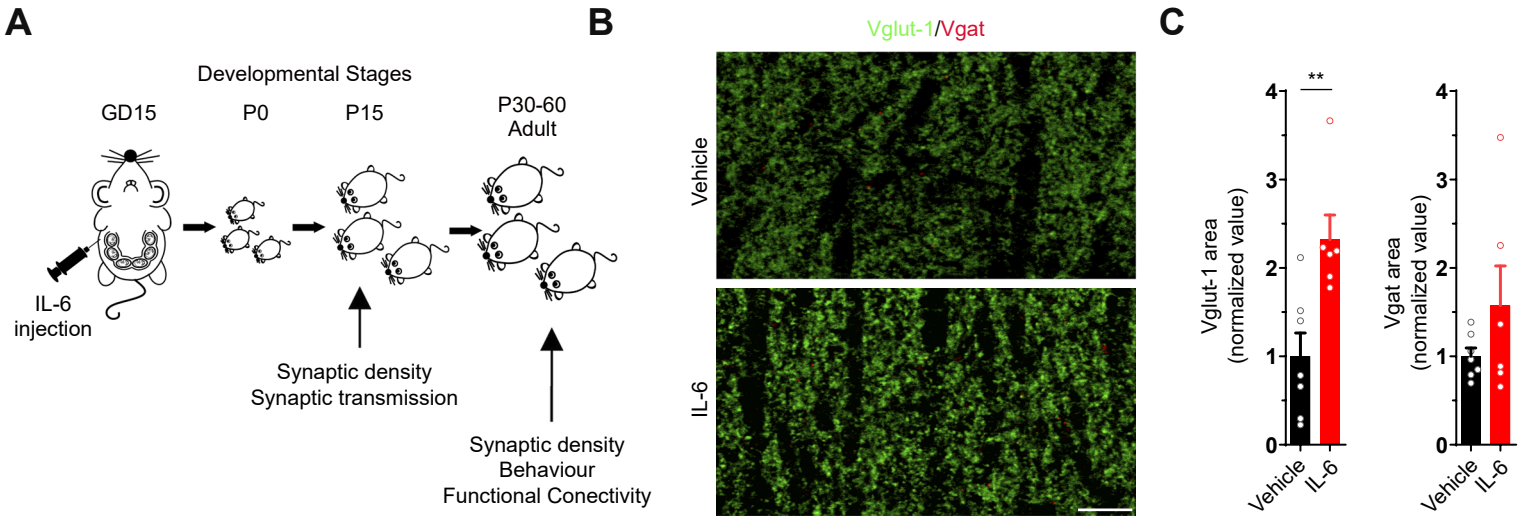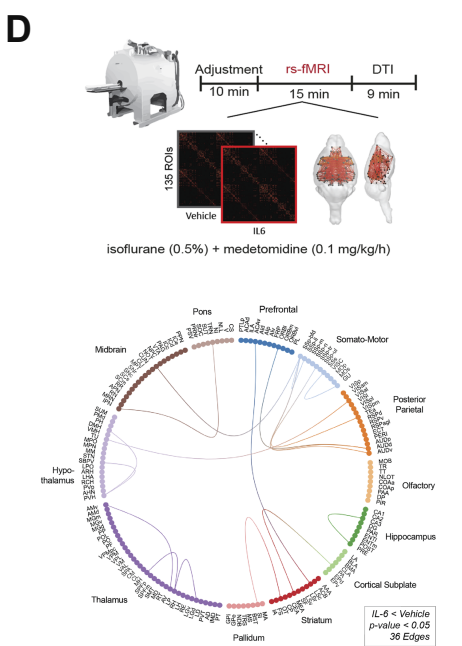

**E**

| Network                            | (I) Group | (J) Group | Mean Difference (I-J) | Std. Error | Sig.b  |
|------------------------------------|-----------|-----------|-----------------------|------------|--------|
| Secondary Sensory (BFD)            | CTRL      | IL6       | 24.186                | 14.858     | 0.13   |
| Retrosplenial (DMN-like)           | CTRL      | IL6       | -11.05                | 12.44      | 0.392  |
| Lateral Striatum                   | CTRL      | IL6       | 13.454                | 10.045     | 0.205  |
| Dorsal Hippocampus                 | CTRL      | IL6       | -8.239*               | 2.973      | 0.017* |
| Motor                              | CTRL      | IL6       | 6.257                 | 8.085      | 0.454  |
| Visual                             | CTRL      | IL6       | 5.45                  | 4.921      | 0.29   |
| Primary Sensory                    | CTRL      | IL6       | 17.751                | 8.789      | 0.066  |
| Anterior Cingulate (Saliency-like) | CTRL      | IL6       | 3.432                 | 5.104      | 0.514  |
| Auditory / Temporal Association    | CTRL      | IL6       | -9.495                | 5.147      | 0.09   |
| Amygdala                           | CTRL      | IL6       | -0.098                | 1.117      | 0.931  |
| Olfactory / Piriform               | CTRL      | IL6       | 1.453                 | 1.307      | 0.288  |
| Striato - motor                    | CTRL      | IL6       | 1.02                  | 2.092      | 0.635  |
| Ventral Hippocampus / Subiculum    | CTRL      | IL6       | 0.528                 | 0.731      | 0.484  |
| Ventral Striatum                   | CTRL      | IL6       | 1.845                 | 1.203      | 0.151  |
| Thalamus                           | CTRL      | IL6       | -0.454                | 0.646      | 0.496  |

Based on estimated marginal means  
\* The mean difference is significant at p-value < 0.05  
b Adjustment for multiple comparisons: Bonferroni.

**F**

| White Matter Tract             | (I) Group | (J) Group | Mean Difference (I-J) | Std. Error | Sig.b |
|--------------------------------|-----------|-----------|-----------------------|------------|-------|
| Anterior Commissure            | CTRL      | IL6       | 0.014                 | 0.033      | 0.672 |
| Fimbria                        | CTRL      | IL6       | 0                     | 0.008      | 0.981 |
| Corpus Callosum                | CTRL      | IL6       | 0.005                 | 0.007      | 0.462 |
| Formix                         | CTRL      | IL6       | 0                     | 0.01       | 0.973 |
| Cingulum                       | CTRL      | IL6       | 0.006                 | 0.01       | 0.57  |
| Ventral Hippocampal Commissure | CTRL      | IL6       | 0.026                 | 0.019      | 0.186 |
| Internal Capsule               | CTRL      | IL6       | -0.003                | 0.005      | 0.61  |
| Posterior Commissure           | CTRL      | IL6       | 0.011                 | 0.01       | 0.3   |
| Cerebral Peduncle              | CTRL      | IL6       | 0.006                 | 0.008      | 0.406 |

Based on estimated marginal means  
\* The mean difference is significant at p value < 0.05  
b Adjustment for multiple comparison: Bonferroni

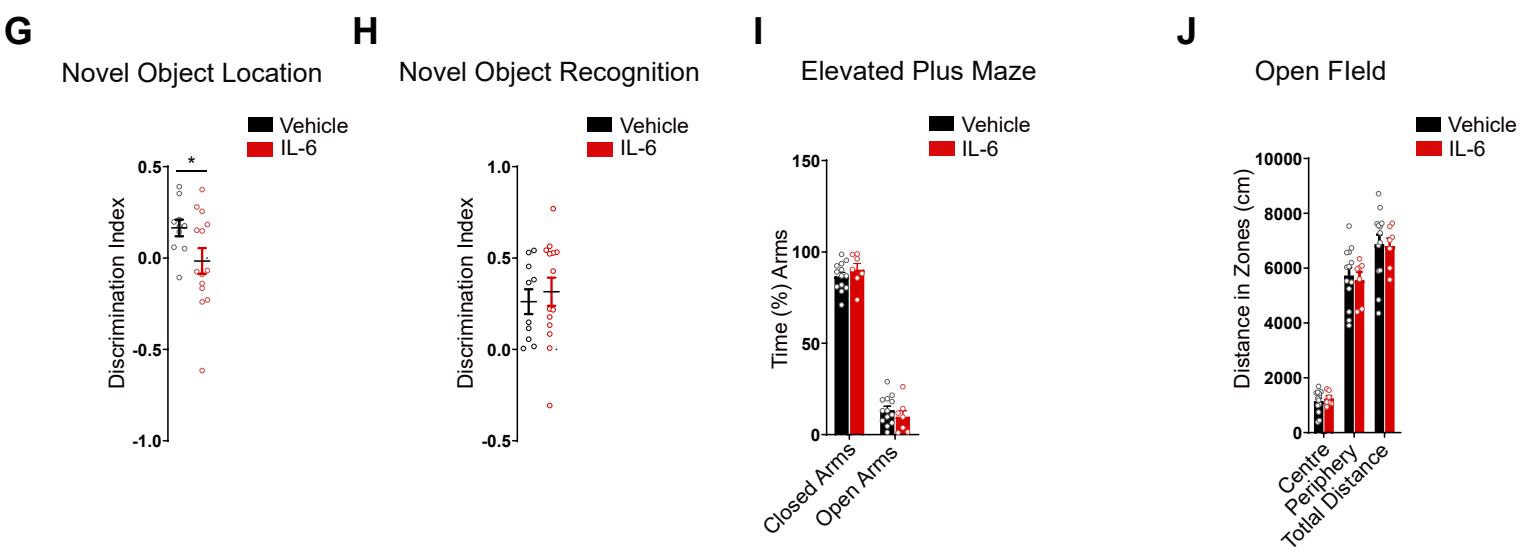

Mirabella et al., Figure S1

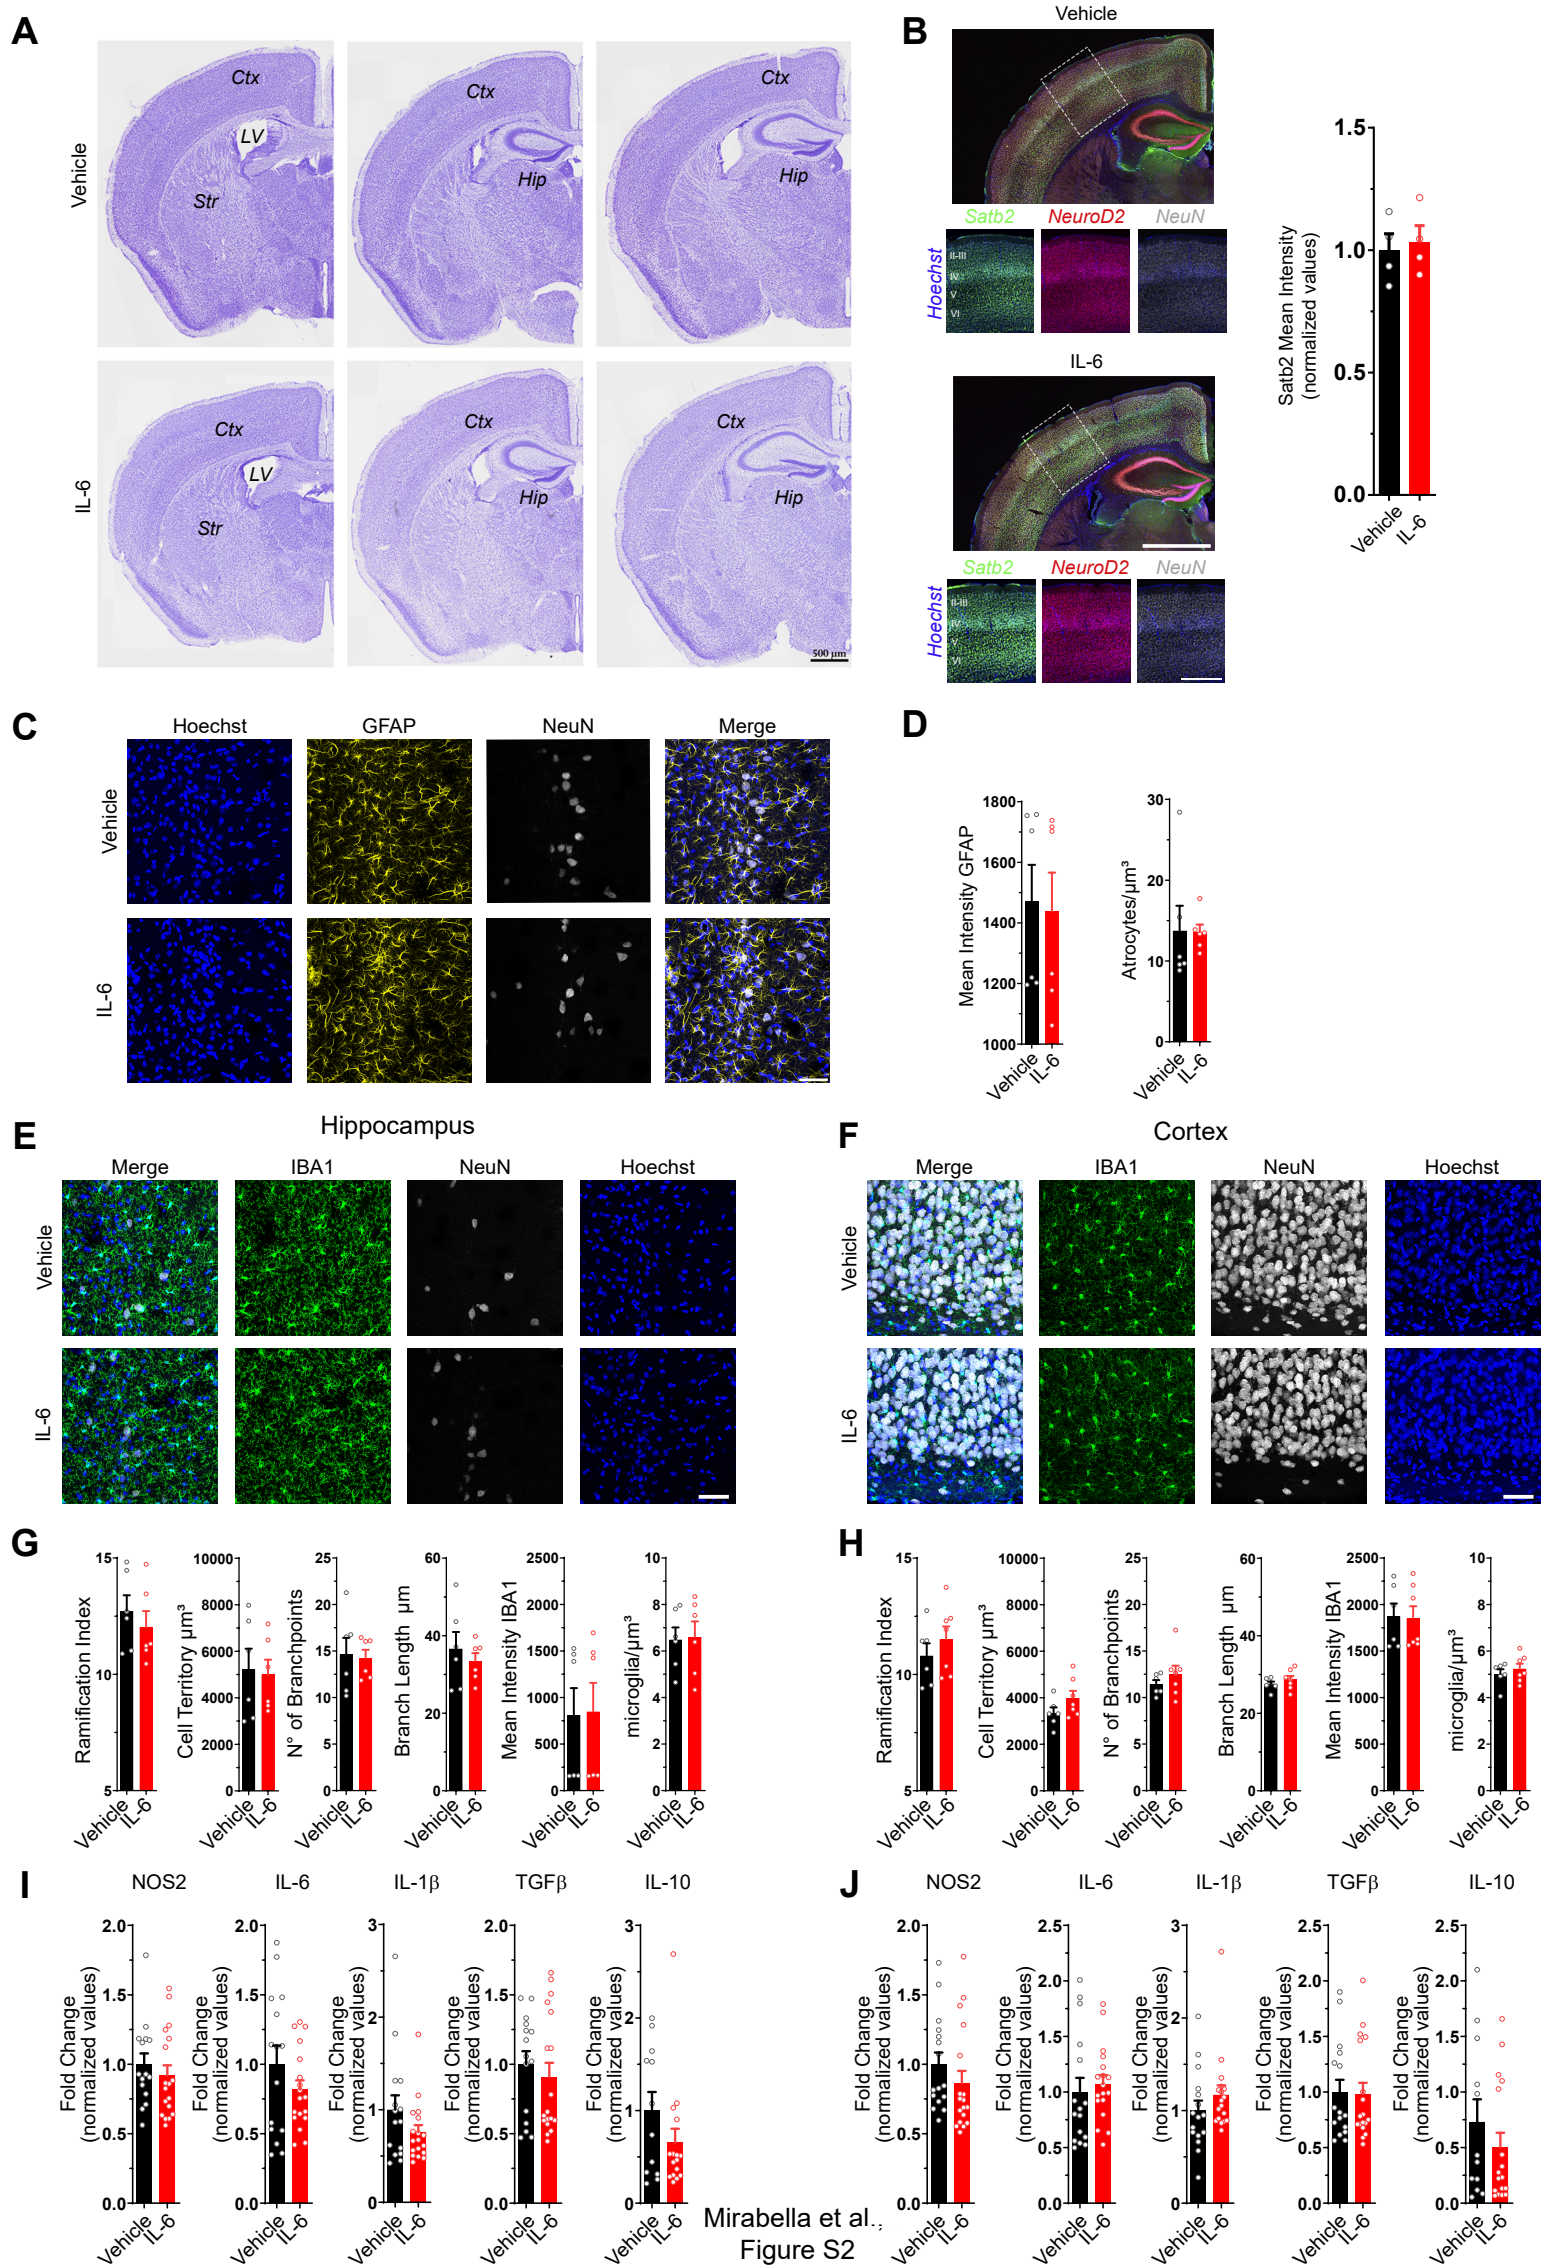

**A**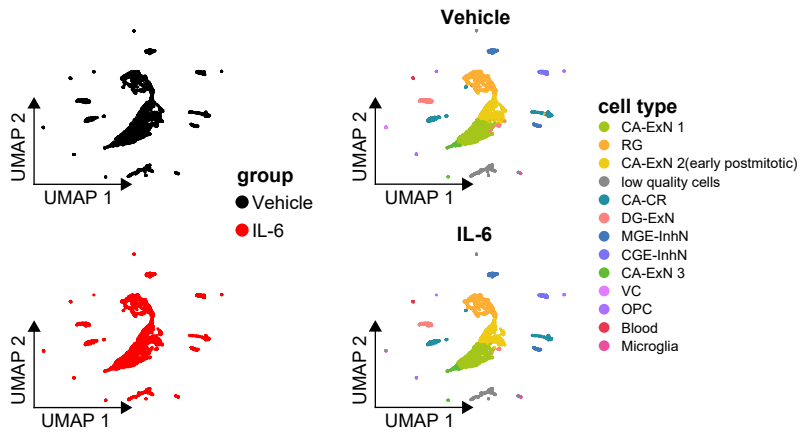**B**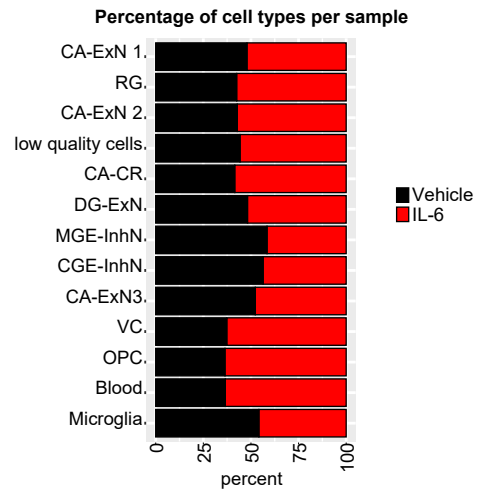**C**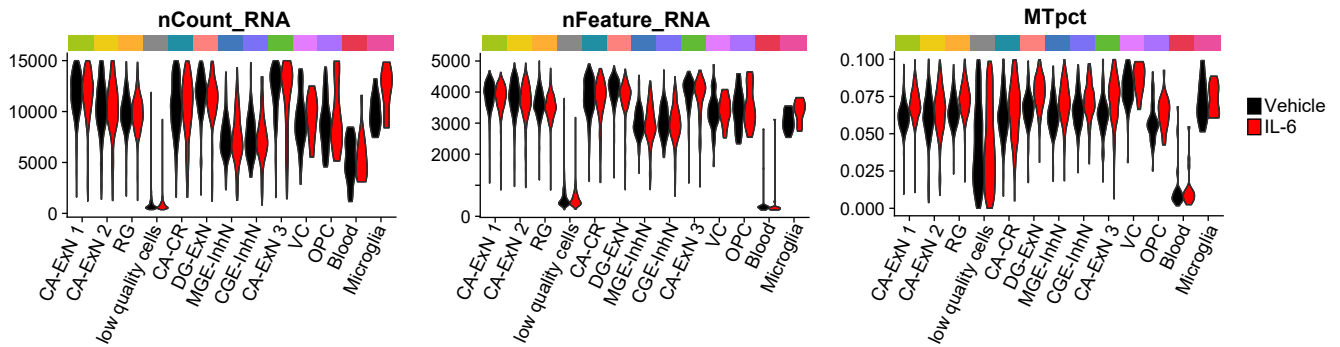**D**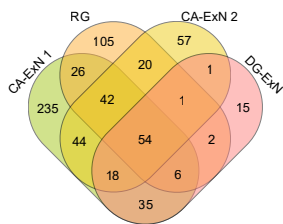**E**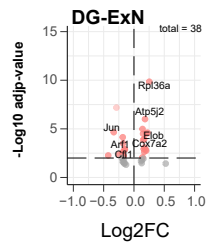**F**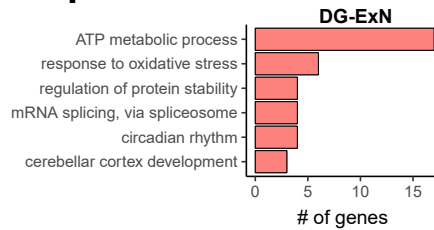

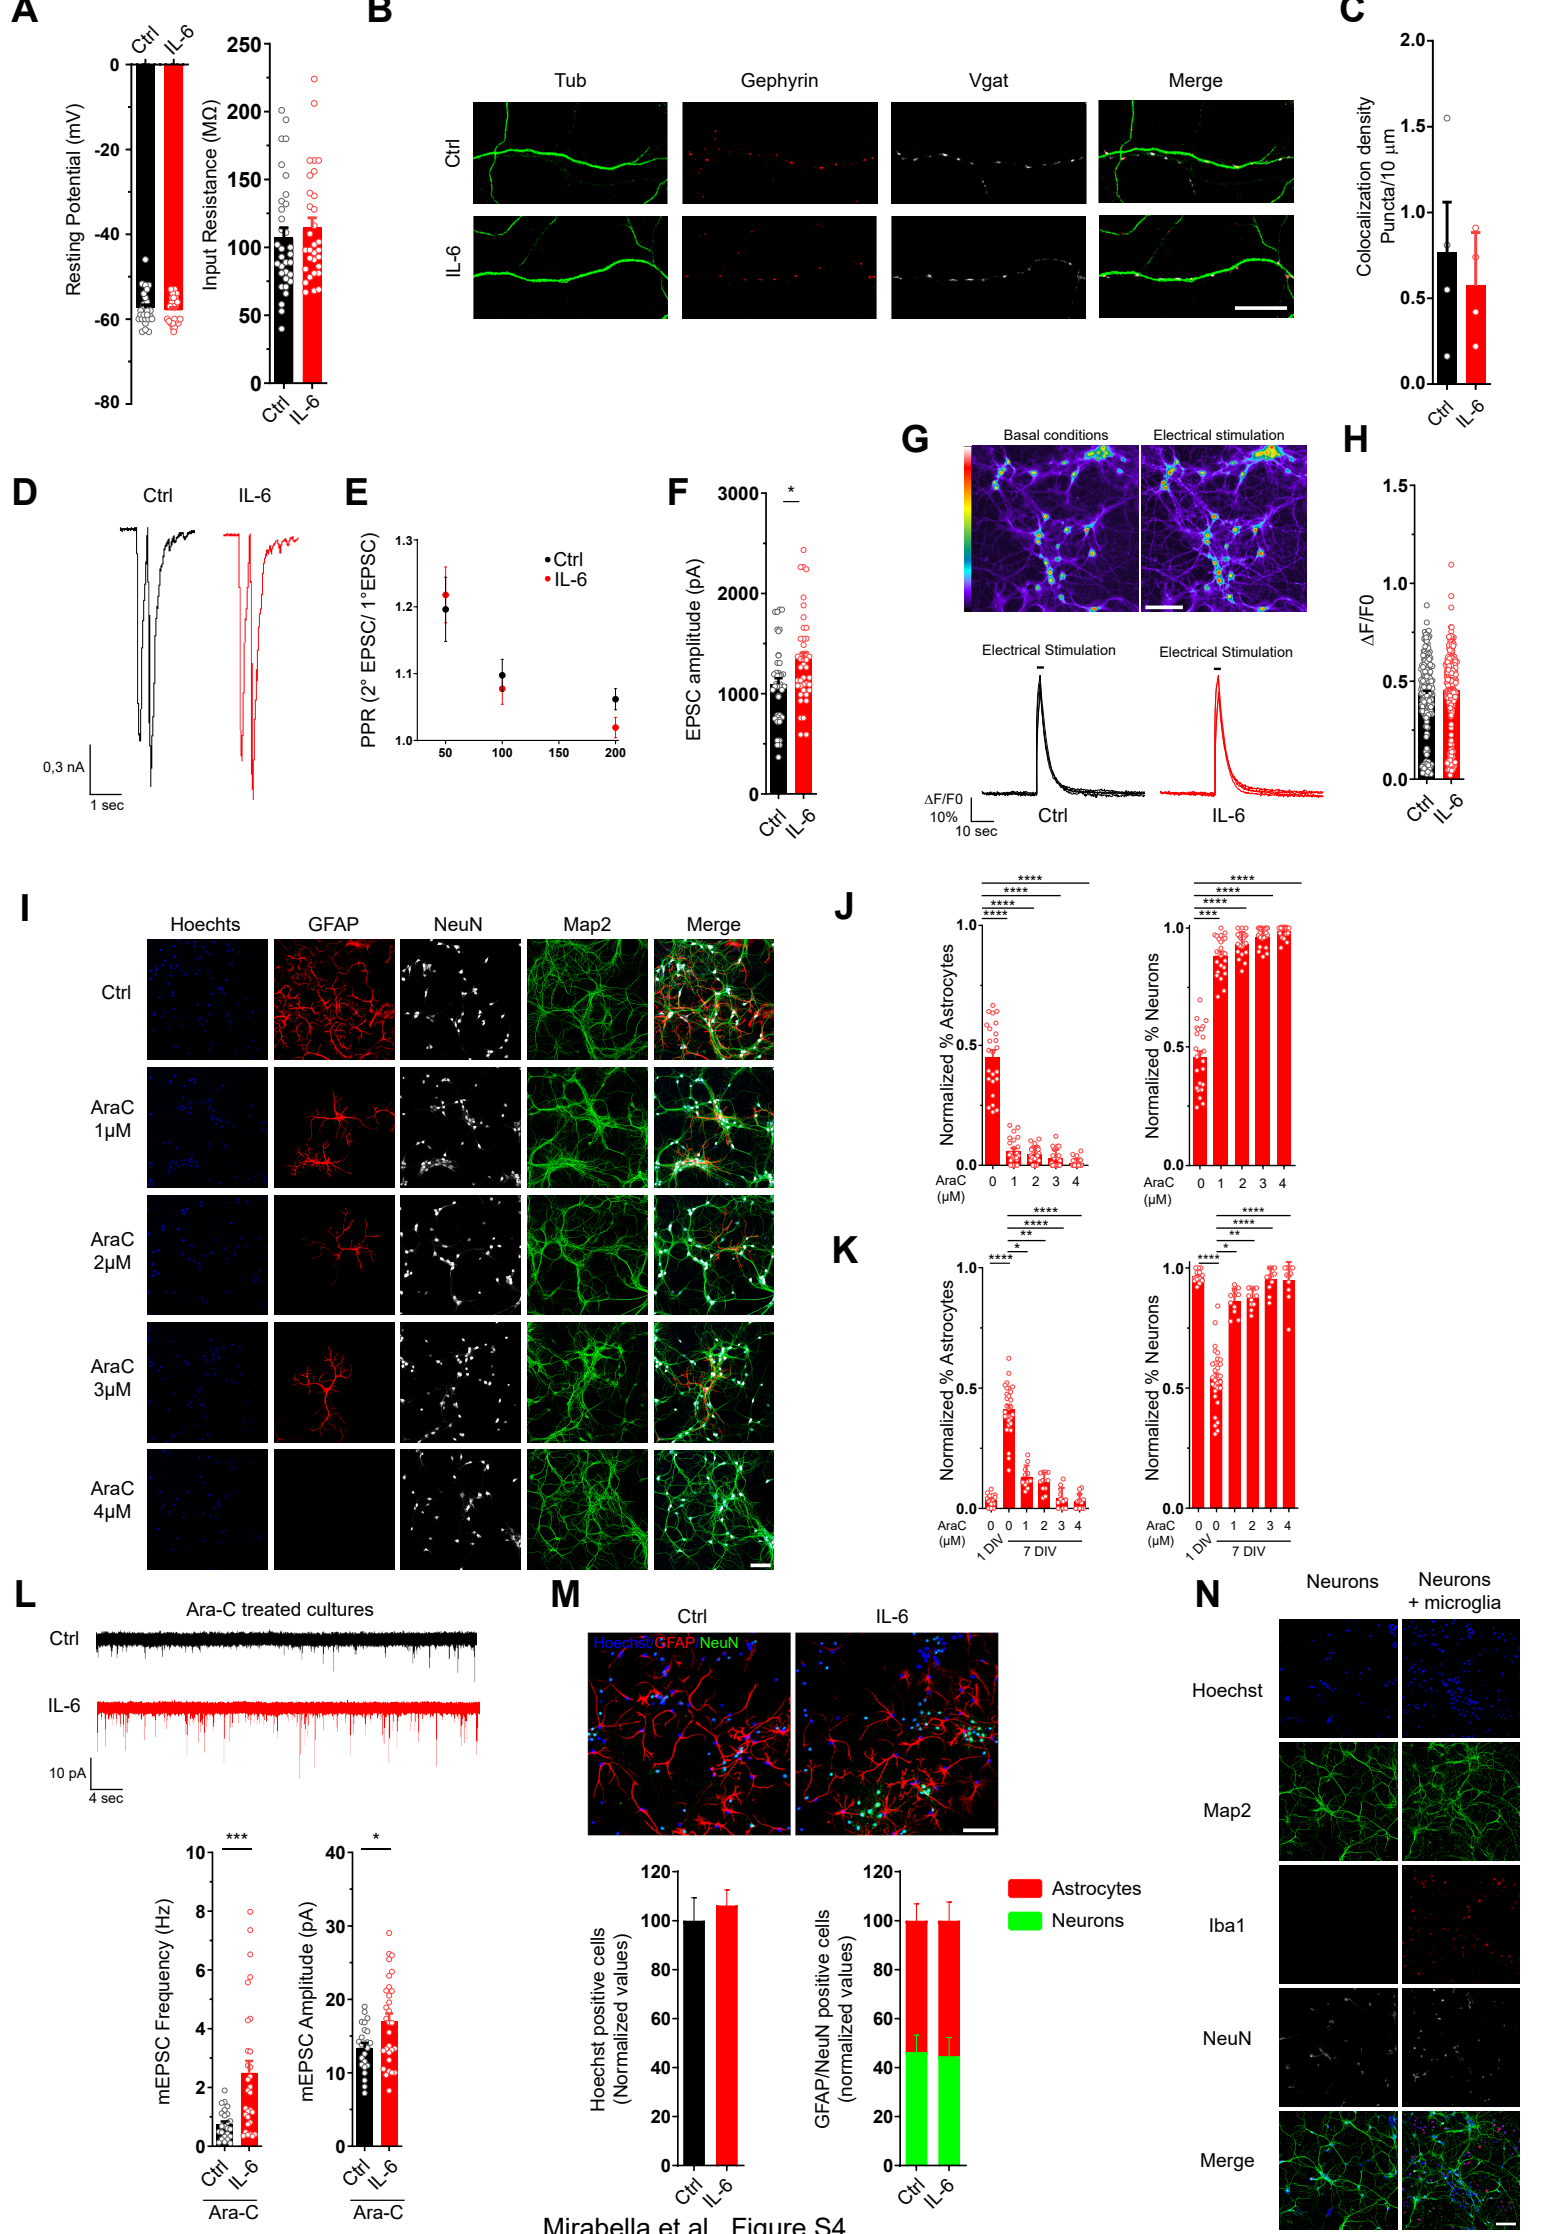

Mirabella et al., Figure S4

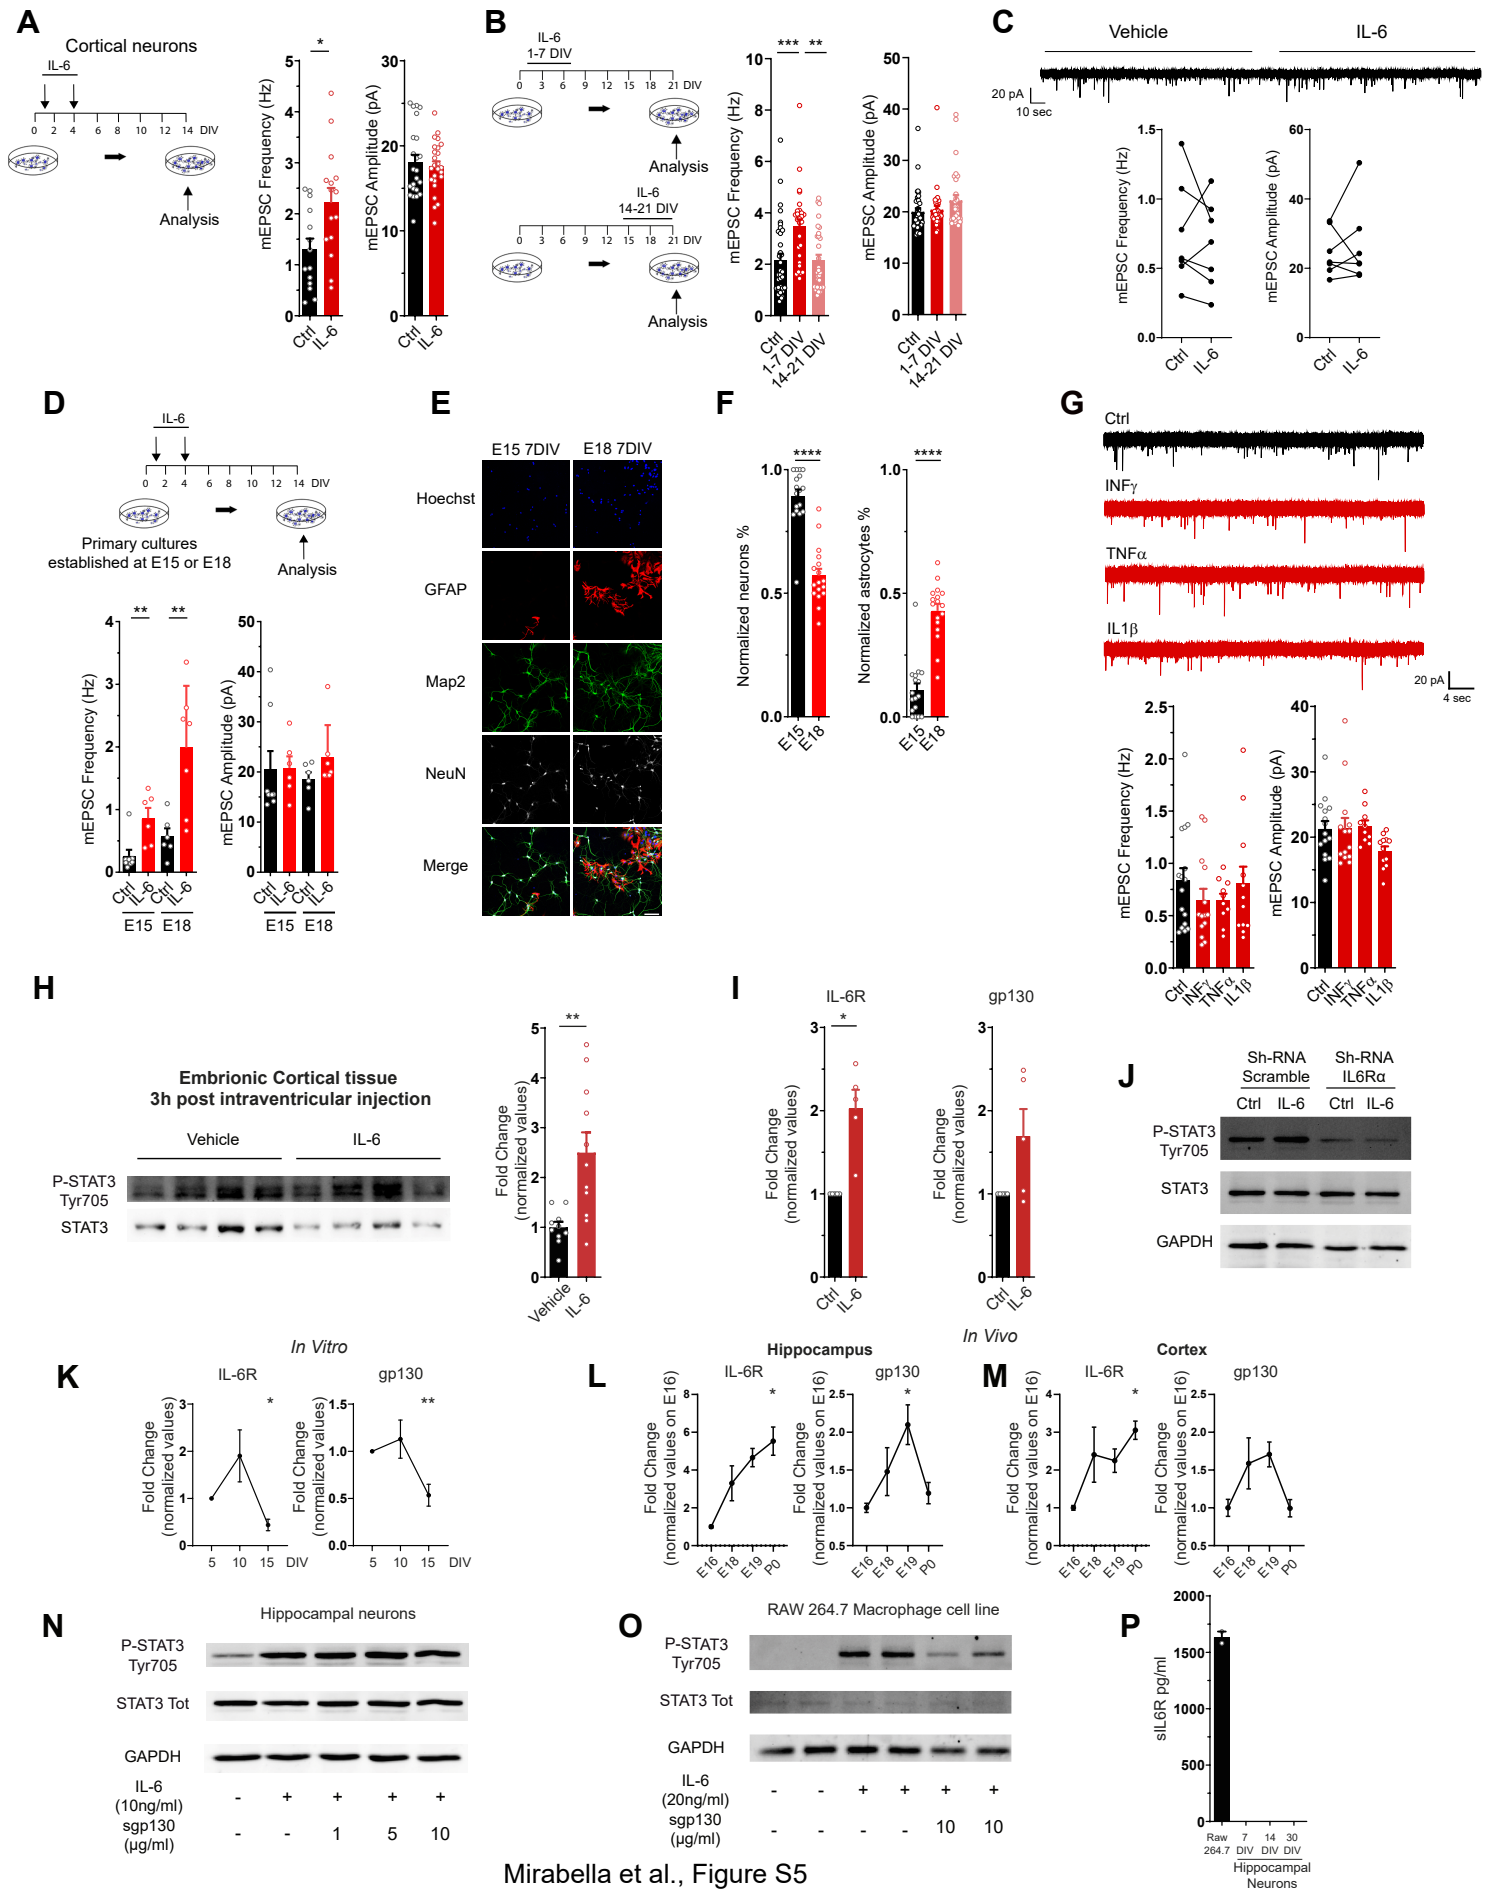

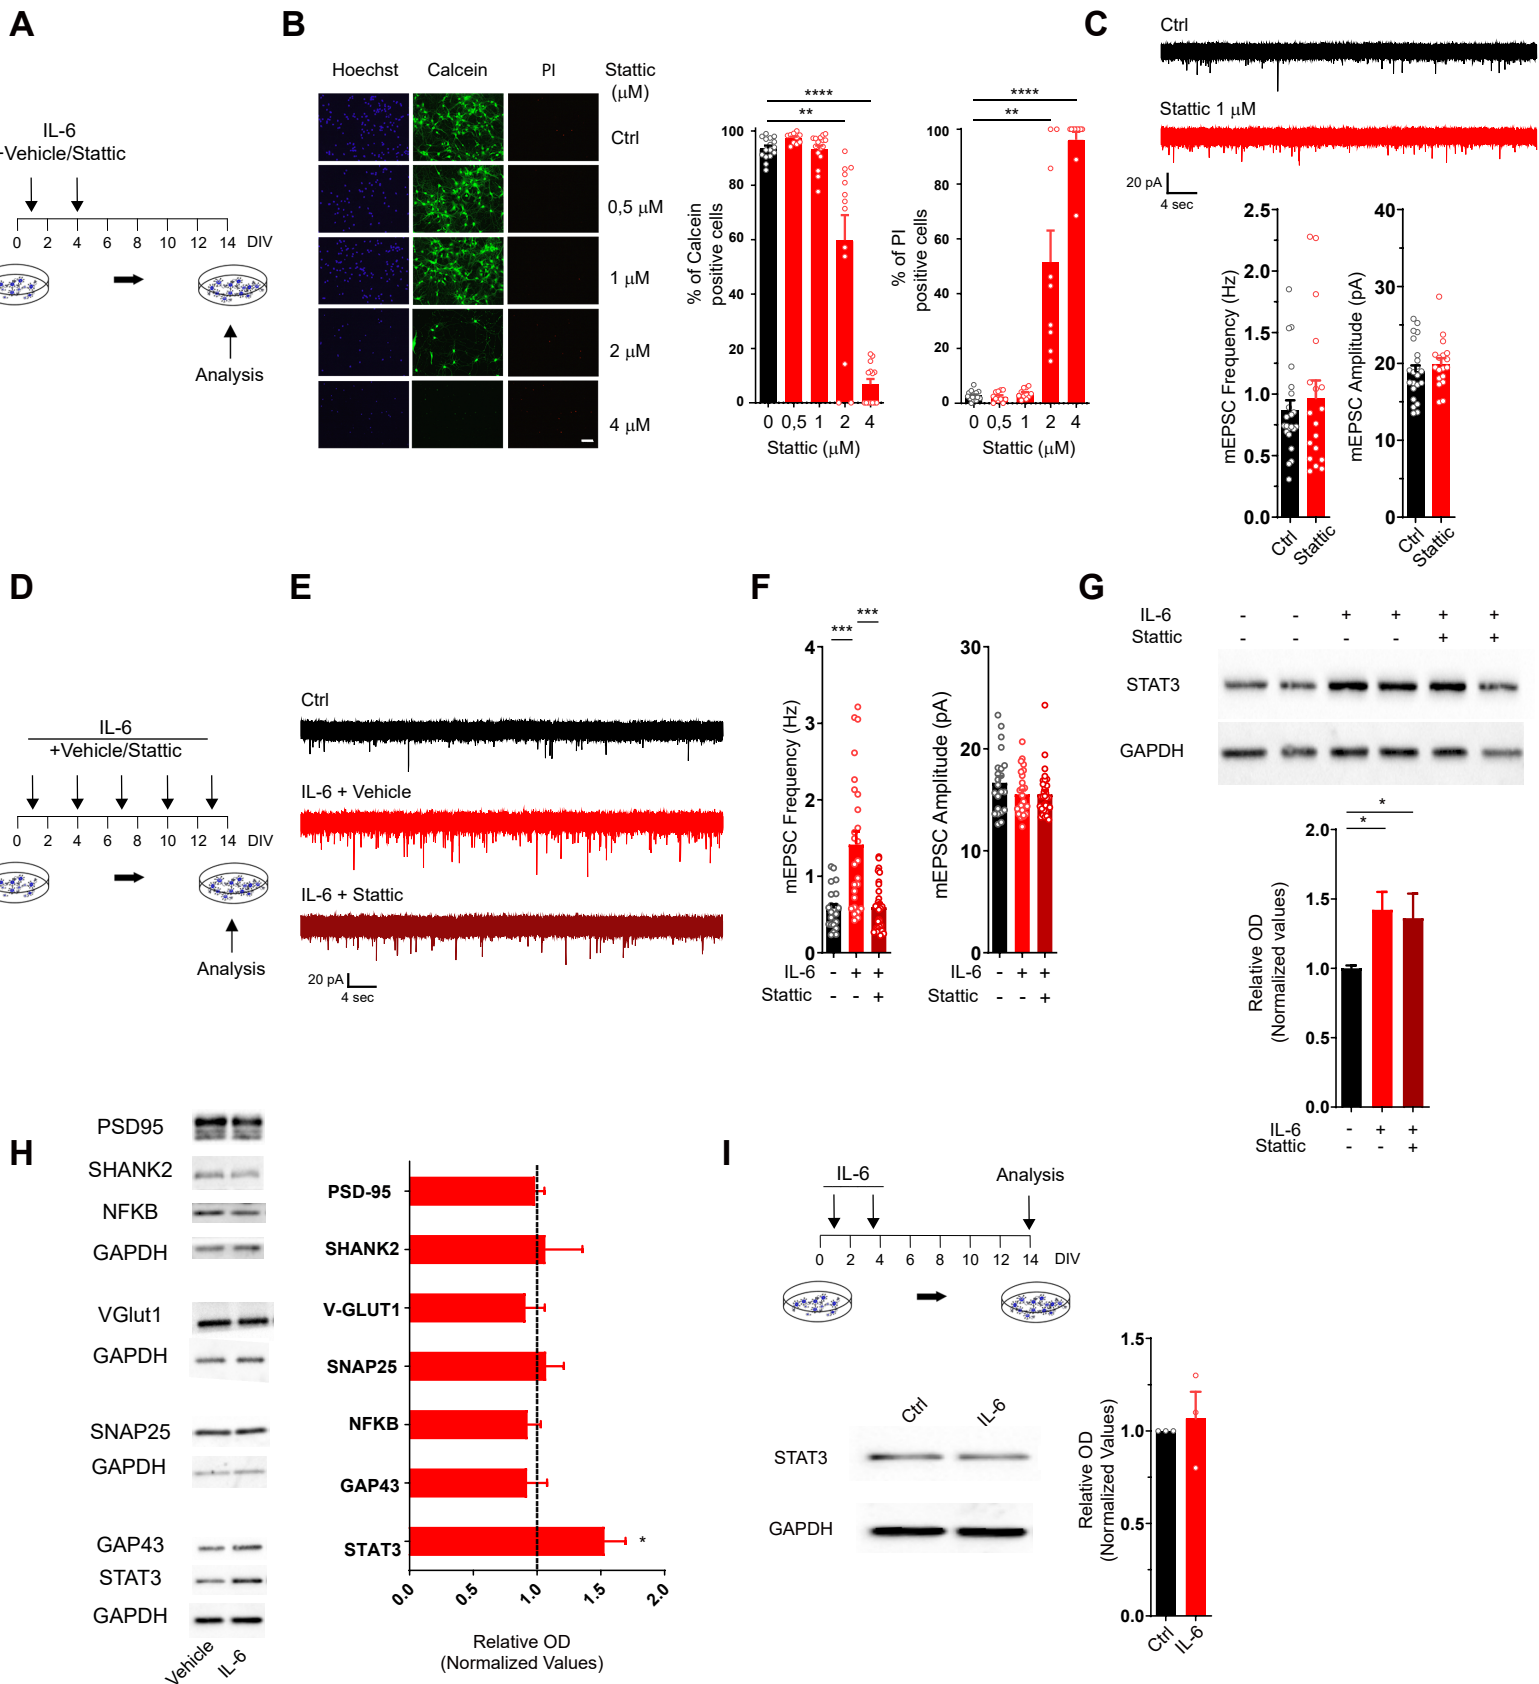

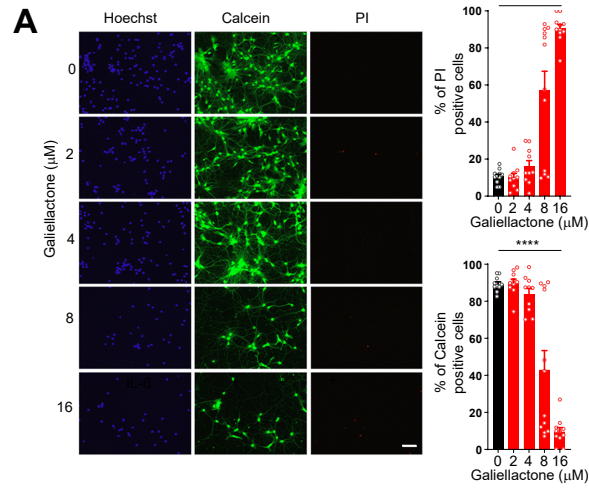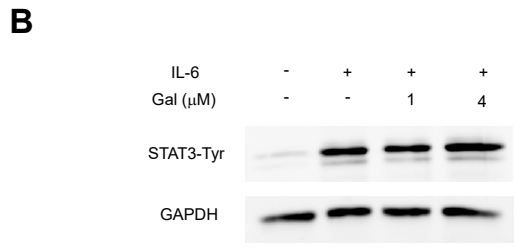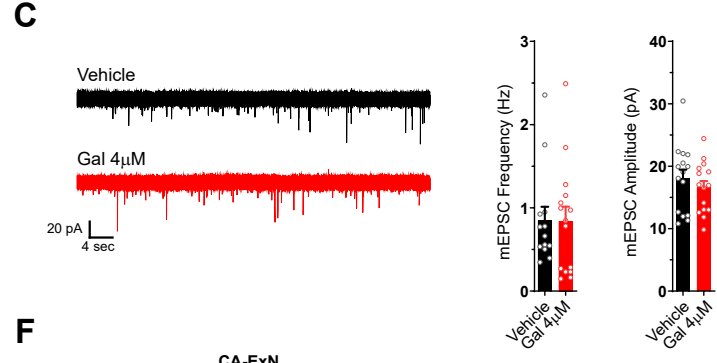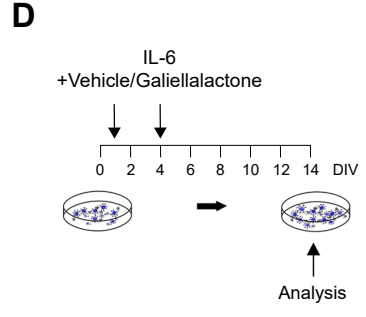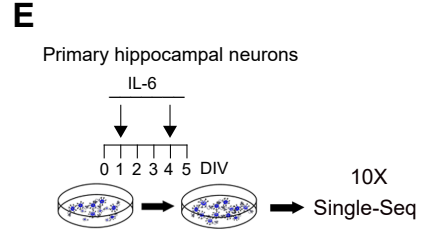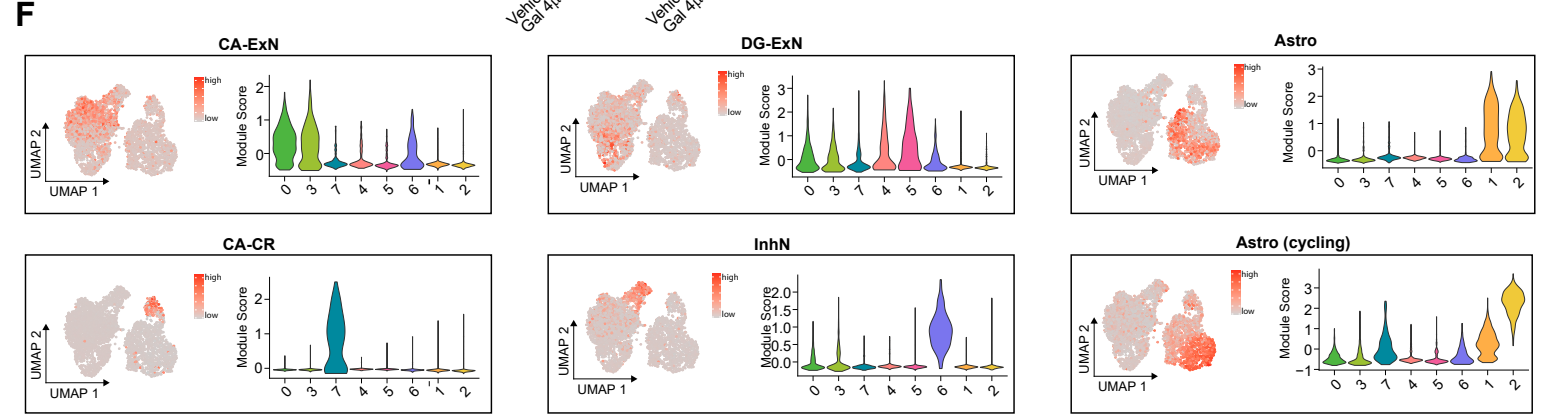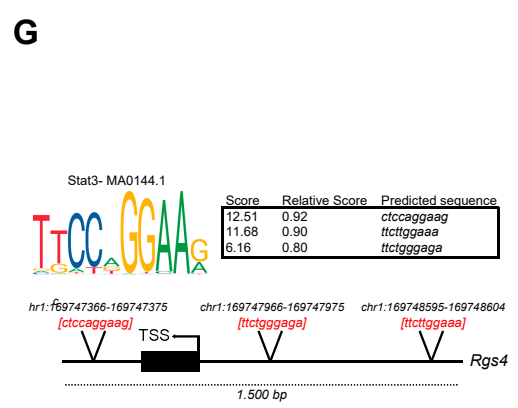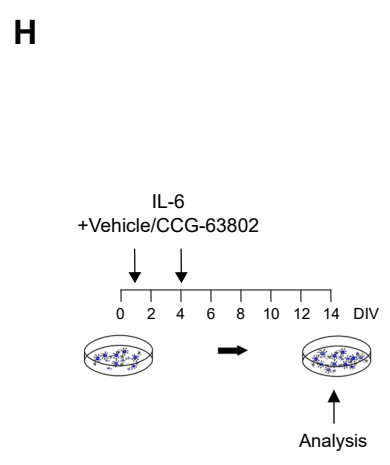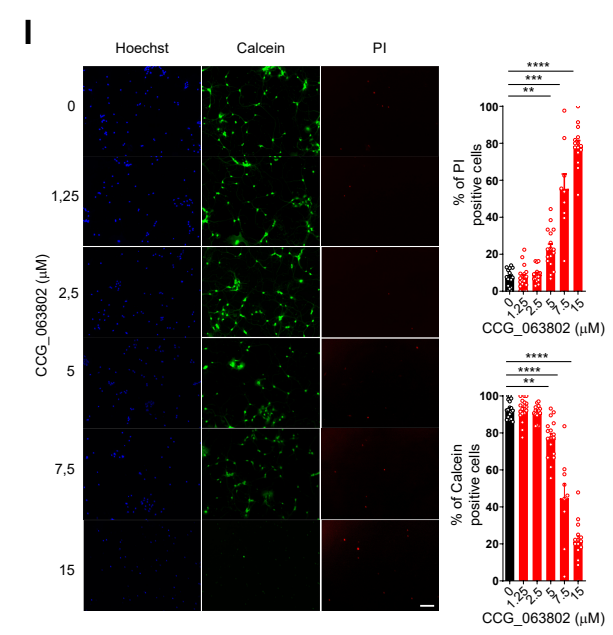

Supplement: mmc6.pdf [file mmc6.pdf]
